# Supplementary material for: Design and Synthesis of Pleuromutilin Derivatives as Antibacterial Agents Using Quantitative Structure–Activity Relationship Model
Source: MDPI journal article supplement (doi:10.3390/ijms25042256), 2024-02-13
Supplement: s1 [file s1]

## Supporting Information

# Design and Synthesis of Pleuromutilin Derivatives as Antibacterial Agents Using Quantitative Structure–Activity Relationship Model

Jiaming Zhang <sup>1,2</sup>, Qinqin Liu <sup>1</sup>, Haoxia Zhao <sup>1</sup>, Guiyu Li <sup>1</sup>, Yunpeng Yi <sup>2,\*</sup> and Ruofeng Shang <sup>1,\*</sup>

<sup>1</sup> Key Laboratory of New Animal Drug Project, Gansu Province/Key Laboratory of Veterinary Pharmaceutical Development, Ministry of Agriculture and Rural Affairs/Lanzhou Institute of Husbandry and Pharmaceutical Sciences of CAAS, Lanzhou 730050, China; jiamingzhang1998@foxmail.com (J.Z.); 118736127157@163.com (Q.L.); haoxiaz0112@163.com (H.Z.); jyly0613@163.com (G.L.)

<sup>2</sup> Shandong Provincial Animal and Poultry Green Health Products Creation Engineering Laboratory, Institute of Poultry Science, Shandong Academy of Agricultural Science, Jinan 250023, China

\* Correspondence: yiyunpeng@saas.ac.cn (Y.Y.); shangruofeng@caas.cn (R.S.); Tel.: +86-531-66655359 (Y.Y.); +86-931-2115253 (R.S.); Fax: +86-531-66655350 (Y.Y.); +86-931-2115951 (R.S.)

**Figure S1.** IR, <sup>1</sup>H NMR and <sup>13</sup>C NMR spectrum of compound **1**.

**Figure S2.** IR, <sup>1</sup>H NMR and <sup>13</sup>C NMR spectrum of compound **2**.

**Table S1.** Summary of crystal data and structural refinement results for compound **1**.

**Table S2.** Summary of 955 small molecules with MIC (pMIC) activity values against MRSA.

**Table S3.** Summary of 51 compounds for 3D-QSAR model construction.

**Table S4** Summary of experimental versus predictive activity(3D-QSAR).

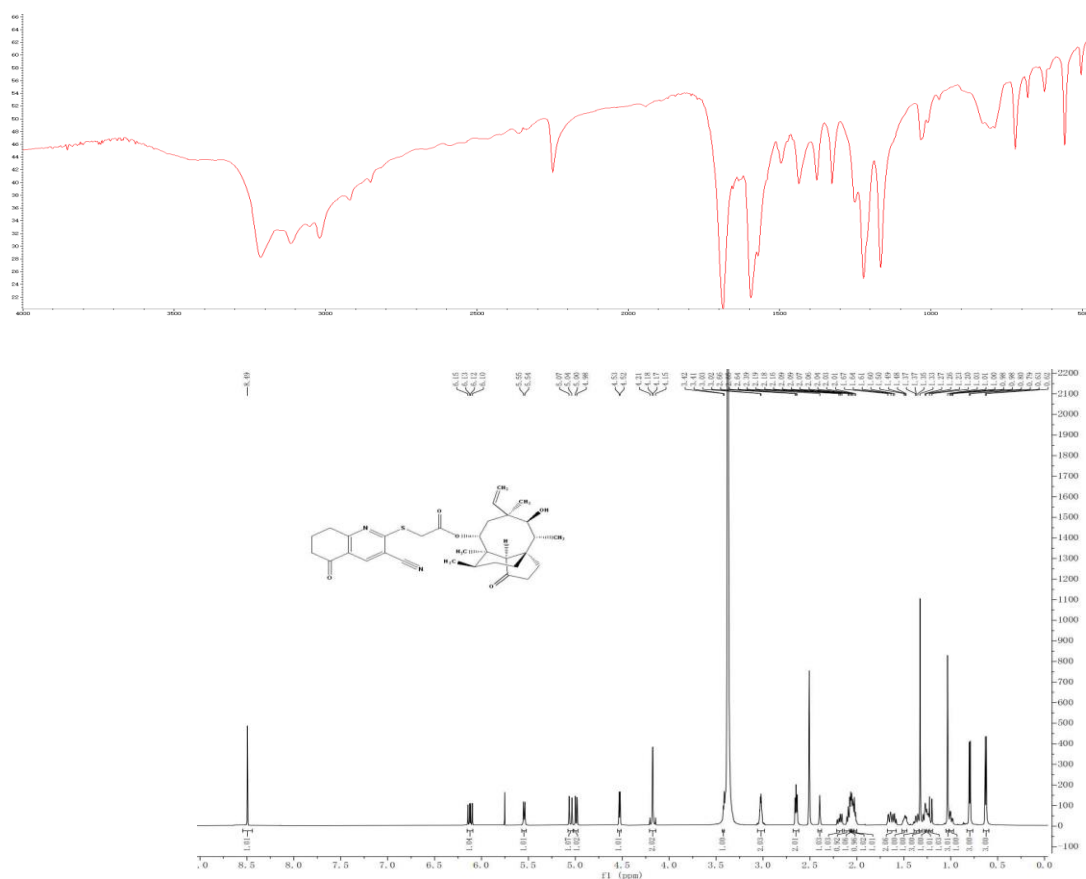

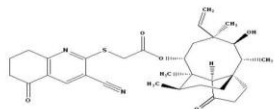

Chemical structure of compound 10 is shown above the spectrum. The structure is a complex polycyclic molecule with a phenyl group, a methine group, and several methyl groups. The spectrum shows peaks from 0.5 to 7.5 ppm. Aromatic protons appear as a multiplet between 7.1 and 7.5 ppm. A singlet at 6.3 ppm corresponds to the phenyl ring protons. A singlet at 5.6 ppm is assigned to the methine proton. A multiplet between 4.9 and 5.2 ppm corresponds to the methylene protons. A singlet at 3.5 ppm is assigned to the methyl group. A multiplet between 0.8 and 1.5 ppm corresponds to the aliphatic protons. The chemical structure of compound 10 is shown above the spectrum.



Table S2. Summary of 955 small molecules with MIC activity values against MRSA.

| SMILES                                                                                                                                                        | pMIC |
|---------------------------------------------------------------------------------------------------------------------------------------------------------------|------|
| <chem>O=C(CC1)[C@2]([H])[C@@31][C@@H](C)[C@H](O)[C@](C)(C=C)C[C@@H](OC(CSCC4=CSC(NC(C5=CC=NC(=C5)=O)=N4)=O)[C@2](C)[C@H](C)CC3</chem>                         | 8.20 |
| <chem>O=C(CC1)[C@2]([H])[C@@31][C@@H](C)[C@H](O)[C@](C)(C=C)C[C@@H](OC(CSCC4=CSC(NC(C5=CC=CC(N)=C5)=O)=N4)=O)[C@2](C)[C@H](C)CC3</chem>                       | 7.90 |
| <chem>O=C(CC1)[C@2]([H])[C@@31][C@@H](C)[C@H](O)[C@](C)(C=C)C[C@@H](OC(CSCC4=CSC(NC(C5=CC=C(N)C=C5)=O)=N4)=O)[C@2](C)[C@H](C)CC3</chem>                       | 7.90 |
| <chem>O=C(CC1)[C@2]([H])[C@@31][C@@H](C)[C@H](O)[C@](C)(C=C)C[C@@H](OC(CSC4=CC(C(NC5=CC=C(S(=O)(NC6=CC=CC=N6)=O)C=C5)=O)=CC=C4)=O)[C@2](C)[C@H](C)CC3</chem>  | 7.67 |
| <chem>O=C(CC1)[C@2]([H])[C@@31][C@@H](C)[C@H](O)[C@](C)(C=C)C[C@@H](OC(CN4CCN(C5=CC=C([N+])([O-])=O)C=C5)CC4)=O)[C@2](C)[C@H](C)CC3</chem>                    | 7.58 |
| <chem>O=C(CC1)[C@2]([H])[C@@31][C@@H](C)[C@H](O)[C@](C)(C=C)C[C@@H](OC(CN4CCN(C5=CC=CC=C5)CC4)=O)[C@2](C)[C@H](C)CC3</chem>                                   | 7.57 |
| <chem>O=C(CC1)[C@2]([H])[C@@31][C@@H](C)[C@H](O)[C@](C)(C=C)C[C@@H](OC(CN4CCN(C5=CC=C(C)C=C5)CC4)=O)[C@2](C)[C@H](C)CC3</chem>                                | 7.57 |
| <chem>O=C(CC1)[C@2]([H])[C@@31][C@@H](C)[C@H](O)[C@](C)(C=C)C[C@@H](OC(CSC4=C(N)C=CC=C4)=O)[C@2](C)[C@H](C)CC3</chem>                                         | 7.49 |
| <chem>O=C(CC1)[C@2]([H])[C@@31][C@@H](C)[C@H](O)[C@](C)(C=C)C[C@@H](OC(CN4N=NC(C5=CC=C(CN6C7=NC=NC(N)=C7N=C6)C=C5)=C4)=O)[C@2](C)[C@H](C)CC3</chem>           | 7.34 |
| <chem>O=C(CC1)[C@2]([H])[C@@31][C@@H](C)[C@H](O)[C@](C)(C=C)C[C@@H](OC(CSC4=CC(C(NC5=CC=C(S(=O)(N)=O)C=C5)=O)=CC=C4)=O)[C@2](C)[C@H](C)CC3</chem>             | 7.32 |
| <chem>O=C(CC1)[C@2]([H])[C@@31][C@@H](C)[C@H](O)[C@](C)(C=C)C[C@@H](OC(CN4CCN(C5=CC=CC(C)=C5)CC4)=O)[C@2](C)[C@H](C)CC3</chem>                                | 7.27 |
| <chem>O=C(CC1)[C@2]([H])[C@@31][C@@H](C)[C@H](O)[C@](C)(C=C)C[C@@H](OC(CNC4=CC=CC(F)=C4)=O)[C@2](C)[C@H](C)CC3</chem>                                         | 7.20 |
| <chem>O=C(CC1)[C@2]([H])[C@@31][C@@H](C)[C@H](O)[C@](C)(C=C)C[C@@H](OC(CSC4CCN(C(CCN5C=NC6=C5N=C(N)N=C6)=O)CC4)=O)[C@2](C)[C@H](C)CC3</chem>                  | 7.13 |
| <chem>O=C(CC1)[C@2]([H])[C@@31][C@@H](C)[C@H](O)[C@](C)(C=C)C[C@@H](OC(CSC4CCN(C(CCN5C=NC6=C5N=CN=C6)=O)CC4)=O)[C@2](C)[C@H](C)CC3</chem>                     | 7.12 |
| <chem>O=C(CC1)[C@2]([H])[C@@31][C@@H](C)[C@H](O)[C@](C)(C=C)C[C@@H](OC(CSC4CCN(C(CCN5C=NC6=C5N=CN=C6N7CCNCC7)=O)CC4)=O)[C@2](C)[C@H](C)CC3</chem>             | 7.07 |
| <chem>CC1C23C(C(CC3)=O)C(C(CC(C=C)(C)C1O)OC(CN4CCN(C(CN5CCN(C6=C([N+])([O-])=O)C=CC=C6)CC5)=O)CC4)=O)(C(CC2)C)C</chem>                                        | 7.04 |
| <chem>O=C(CC1)[C@2]([H])[C@@31][C@@H](C)[C@H](O)[C@](C)(C=C)C[C@@H](OC(CSC4=CC(CO)=CN=C4)=O)[C@2](C)[C@H](C)CC3</chem>                                        | 7.03 |
| <chem>O=C(CC1)[C@2]([H])[C@@31][C@@H](C)[C@H](O)[C@](C)(C=C)C[C@@H](OC(CSC4=CC(CO)=NC=C4)=O)[C@2](C)[C@H](C)CC3</chem>                                        | 7.03 |
| <chem>O=C(CC1)[C@2]([H])[C@@31][C@@H](C)[C@H](O)[C@](C)(C=C)C[C@@H](OC(CN4N=NC(C5=CC=CC(N6C7=NC=NC(N)=C7N=C6)C=C5)=C4)=O)[C@2](C)[C@H](C)CC3</chem>           | 7.03 |
| <chem>O=C(CC1)[C@2]([H])[C@@31][C@@H](C)[C@H](O)[C@](C)(C=C)C[C@@H](OC(CN4N=NC(C5=CC=CC(N6C=NC7=C6N=CN=C7N)=C5)=C4)=O)[C@2](C)[C@H](C)CC3</chem>              | 7.03 |
| <chem>O=C(CC1)[C@2]([H])[C@@31][C@@H](C)[C@H](O)[C@](C)(C=C)C[C@@H](OC(CSCC4=CSC(NC(C5=CC=C([N+])([O-])=O)C=C5)=O)=N4)=O)[C@2](C)[C@H](C)CC3</chem>           | 7.02 |
| <chem>O=C(CC1)[C@2]([H])[C@@31][C@@H](C)[C@H](O)[C@](C)(C=C)C[C@@H](OC(CSC4=CC(N)=CN=C4)=O)[C@2](C)[C@H](C)CC3</chem>                                         | 7.02 |
| <chem>O=C1CC[C@2](CC[C@H]3C)[C@1]([H])[C@3](C)[C@H](O)[C@](C)(C=C)C[C@@H](OC(CSC4=NC(NC(C5=C5C(NC(CN(CC)CC)=O)=N4)=O)C[C@@H](C)(C=C)C[C@@H](O)[C@@H]2C</chem> | 7.01 |
| <chem>O=C(CC1)[C@2]([H])[C@@31][C@@H](C)[C@H](O)[C@](C)(C=C)C[C@@H](OC(CSC4=C(NC(CN5CCOCC5)=O)C=CC=C4)=O)[C@2](C)[C@H](C)CC3</chem>                           | 7.01 |
| <chem>O=C1CC[C@2](CC[C@H]3C)[C@1]([H])[C@3](C)[C@H](O)[C@](C)(C=C)C[C@@H](OC(CSC4=NC(NC(C6CCCC6)=O)=N4)=O)C[C@@H](C)(C=C)C[C@@H](O)[C@@H]2C</chem>            | 7.01 |
| <chem>O=C(CC1)[C@2]([H])[C@@31][C@@H](C)[C@H](O)[C@](C)(C=C)C[C@@H](OC(CSC4=NC=CC=C4)=O)[C@2](C)[C@H](C)CC3</chem>                                            | 7.00 |
| <chem>O=C(CC1)[C@2]([H])[C@@31][C@@H](C)[C@H](O)[C@](C)(C=C)C[C@@H](OC(CSC4=CC(NC(CN5CCC(O)CC5)=O)=CN=C4)=O)[C@2](C)[C@H](C)CC3</chem>                        | 7.00 |
| <chem>O=C(CC1)[C@2]([H])[C@@31][C@@H](C)[C@H](O)[C@](C)(C=C)C[C@@H](OC(CN4CCN(C(C=C/C5=CC=C([N+])([O-])=O)C=C5)=O)CC4)=O)[C@2](C)[C@H](C)CC3</chem>           | 7.00 |
| <chem>O=C(CC1)[C@2]([H])[C@@31][C@@H](C)[C@H](O)[C@](C)(C=C)C[C@@H](OC(CS(SC4=NC5=C(C=CC(OC)=C5)N4)=O)=O)[C@2](C)[C@H](C)CC3</chem>                           | 6.99 |
| <chem>O=C(CC1)[C@2]([H])[C@@31][C@@H](C)[C@H](O)[C@](C)(C=C)C[C@@H](OC(CSCC4=CSC(NC(C5=CC=CC(C5)=O)=N4)=O)[C@2](C)[C@H](C)CC3</chem>                          | 6.99 |
| <chem>O=C(CC1)[C@2]([H])[C@@31][C@@H](C)[C@H](O)[C@](C)(C=C)C[C@@H](OC(CS(SC4=NC(OC)=CC(OC)=N4)=O)=O)[C@2](C)[C@H](C)CC3</chem>                               | 6.99 |
| <chem>O=C(CC1)[C@2]([H])[C@@31][C@@H](C)[C@H](O)[C@](C)(C=C)C[C@@H](OC(CS(SC4=NC5=C(C=CC=C5)S4)=O)=O)[C@2](C)[C@H](C)CC3</chem>                               | 6.98 |
| <chem>O=C(CC1)[C@2]([H])[C@@31][C@@H](C)[C@H](O)[C@](C)(C=C)C[C@@H](OC(CSCC4=CSC(NC(C5=CC=CO5)=O)=N4)=O)[C@2](C)[C@H](C)CC3</chem>                            | 6.98 |
| <chem>O=C(CC1)[C@2]([H])[C@@31][C@@H](C)[C@H](O)[C@](C)(C=C)C[C@@H](OC(CSC4=CC(NC([C@@H](N)CC(C)C)=O)=CN=C4)=O)[C@2](C)[C@H](C)CC3</chem>                     | 6.98 |
| <chem>O=C(CC1)[C@2]([H])[C@@31][C@@H](C)[C@H](O)[C@](C)(C=C)C[C@@H](OC(CN4CCN(C(C=C/C5=CC=C(N)C=C5)=O)CC4)=O)[C@2](C)[C@H](C)CC3</chem>                       | 6.98 |
| <chem>O=C(CC1)[C@2]([H])[C@@31][C@@H](C)[C@H](O)[C@](C)(C=C)C[C@@H](OC(CS(SC4=NC(N)=CC(N)=N4)=O)=O)[C@2](C)[C@H](C)CC3</chem>                                 | 6.96 |
| <chem>O=C(CC1)[C@2]([H])[C@@31][C@@H](C)[C@H](O)[C@](C)(C=C)C[C@@H](OC(CSC4=NN=C(C5=CC=CC(C)=C5)N4)=O)[C@2](C)[C@H](C)CC3</chem>                              | 6.96 |
| <chem>O=C(CC1)[C@2]([H])[C@@31][C@@H](C)[C@H](O)[C@](C)(C=C)C[C@@H](OC(CSCCNC(C4=CC=C(OC)C=C4)=O)=O)[C@2](C)[C@H](C)CC3</chem>                                | 6.96 |
| <chem>O=C(CC1)[C@2]([H])[C@@31][C@@H](C)[C@H](O)[C@](C)(C=C)C[C@@H](OC(CSC4=NN=C(C5=CC=CC=C5OC)N4)=O)[C@2](C)[C@H](C)CC3</chem>                               | 6.96 |
| <chem>O=C(CC1)[C@2]([H])[C@@31][C@@H](C)[C@H](O)[C@](C)(C=C)C[C@@H](OC(CN4CCN(C5=CC=CC=C5[N+])([O-])=O)CC4)=O)[C@2](C)[C@H](C)CC3</chem>                      | 6.96 |
| <chem>O=C(CC1)[C@2]([H])[C@@31][C@@H](C)[C@H](O)[C@](C)(C=C)C[C@@H](OC(CN4CCN(C5=CC=CC([N+])([O-])=O)C5)CC4)=O)[C@2](C)[C@H](C)CC3</chem>                     | 6.96 |
| <chem>O=C(CC1)[C@2]([H])[C@@31][C@@H](C)[C@H](O)[C@](C)(C=C)C[C@@H](OC(CS(SC4=NN=C(C)S4)=O)=O)[C@2](C)[C@H](C)CC3</chem>                                      | 6.95 |
| <chem>O=C(CC1)[C@2]([H])[C@@31][C@@H](C)[C@H](O)[C@](C)(C=C)C[C@@H](OC(CSC4=NN=C(C5=CC=CC=C5F)N4)=O)[C@2](C)[C@H](C)CC3</chem>                                | 6.95 |
| <chem>O=C(CC1)[C@2]([H])[C@@31][C@@H](C)[C@H](O)[C@](C)(C=C)C[C@@H](OC(CSC4=NN=C(C5=CC=CC=C5C)N4)=O)[C@2](C)[C@H](C)CC3</chem>                                | 6.95 |
| <chem>O=C(CC1)[C@2]([H])[C@@31][C@@H](C)[C@H](O)[C@](C)(C=C)C[C@@H](OC(CS(SC4=NC=CC=N4)=O)=O)[C@2](C)[C@H](C)CC3</chem>                                       | 6.94 |
| <chem>O=C(CC1)[C@2]([H])[C@@31][C@@H](C)[C@H](O)[C@](C)(C=C)C[C@@H](OC(CS(SC4=CC=NC=C4)=O)=O)[C@2](C)[C@H](C)CC3</chem>                                       | 6.94 |
| <chem>O=C(CC1)[C@2]([H])[C@@31][C@@H](C)[C@H](O)[C@](C)(C=C)C[C@@H](OC(CS(SC4=NC=CC=C4)=O)=O)[C@2](C)[C@H](C)CC3</chem>                                       | 6.94 |
| <chem>O=C(CC1)[C@2]([H])[C@@31][C@@H](C)[C@H](O)[C@](C)(C=C)C[C@@H](OC(CSC4=CC(NC(CN)=O)=CN=C4)=O)[C@2](C)[C@H](C)CC3</chem>                                  | 6.94 |
| <chem>O=C(CC1)[C@2]([H])[C@@31][C@@H](C)[C@H](O)[C@](C)(C=C)C[C@@H](OC(CN4CCN(C5=CC=CC=C5C)CC4)=O)[C@2](C)[C@H](C)CC3</chem>                                  | 6.93 |
| <chem>O=C(CC1)[C@2]([H])[C@@31][C@@H](C)[C@H](O)[C@](C)(C=C)C[C@@H](OC(CNC4=CC=C(F)C=C4)=O)[C@2](C)[C@H](C)CC3</chem>                                         | 6.90 |
| <chem>O=C(CC1)[C@2]([H])[C@@31][C@@H](C)[C@H](O)[C@](C)(C=C)C[C@@H](OC(CSC4=CN=CC=C4)=O)[C@2](C)[C@H](C)CC3</chem>                                            | 6.88 |
| <chem>O=C(CC1)[C@2]([H])[C@@31][C@@H](C)[C@H](O)[C@](C)(C=C)C[C@@H](OC(CSC4CCN(C(CCN5C=NC6=C5N=C(N)N=C6N(C)C)=O)CC4)=O)[C@2](C)[C@H](C)CC3</chem>             | 6.84 |
| <chem>O=C(CC1)[C@2]([H])[C@@31][C@@H](C)[C@H](O)[C@](C)(C=C)C[C@@H](OC(CSC4=CC(NC(CN5CC(CO)CCC5)=O)=CN=C4)=O)[C@2](C)[C@H](C)CC3</chem>                       | 6.83 |
| <chem>O=C(CC1)[C@2]([H])[C@@31][C@@H](C)[C@H](O)[C@](C)(C=C)C[C@@H](OC(CSC4CCN(C(CCN5C=NC6=C5N=C(N)N=C6N)=O)CC4)=O)[C@2](C)[C@H](C)CC3</chem>                 | 6.83 |
| <chem>O=C(CC1)[C@2]([H])[C@@31][C@@H](C)[C@H](O)[C@](C)(C=C)C[C@@H](OC(CSC4=CC(NC(CN5CC(O)CCC5)=O)=CN=C4)=O)[C@2](C)[C@H](C)CC3</chem>                        | 6.82 |
| <chem>O=C(CC1)[C@2]([H])[C@@31][C@@H](C)[C@H](O)[C@](C)(C=C)C[C@@H](OC(CSC4CCN(C(CCN5C=NC6=C5C=NC(N6)=O)CC4)=O)[C@2](C)[C@H](C)CC3</chem>                     | 6.81 |

|                                                                                                                                                             |      |
|-------------------------------------------------------------------------------------------------------------------------------------------------------------|------|
| O=C(C(C1)[C@2]([H])[C@@31[C@@H](C)[C@H](O)[C@](C)(C=C)[C@@H](OC(CSC4=C(NC(CN5N=NC(CN6CCN(C7=CC=CC([N+](O-)=O)C=C7)CC6)=C5)=O)C=CC=C4)=O)[C@2](C)[C@H](C)CC3 | 6.81 |
| O=C(C(C1)[C@2]([H])[C@@31[C@@H](C)[C@H](O)[C@](C)(C=C)[C@@H](OC(CSC4=C(NC(CN5N=NC(CN6CCN(C7=CC=CC([N+](O-)=O)C=C7)CC6)=C5)=O)C=CC=C4)=O)[C@2](C)[C@H](C)CC3 | 6.81 |
| O=C(C(C1)[C@2]([H])[C@@31[C@@H](C)[C@H](O)[C@](C)(C=C)[C@@H](OC(CSC4CCN(C(CCN5C=NC6=C5N=C(N)N=C6N7CCN(C)CC7)=O)CC4)=O)[C@2](C)[C@H](C)CC3                   | 6.79 |
| O=C(C(C1)[C@2]([H])[C@@31[C@@H](C)[C@H](O)[C@](C)(C=C)[C@@H](OC(CSC4CCN(C(CCN5C=NC6=C5N=CN=C6N7CC(N)CCC7)=O)CC4)=O)[C@2](C)[C@H](C)CC3                      | 6.78 |
| O=C(C(C1)[C@2]([H])[C@@31[C@@H](C)[C@H](O)[C@](C)(C=C)[C@@H](OC(CSC4CCN(C(CCN5C=NC6=C5N=CN=C6N7CC(C7)N)=O)CC4)=O)[C@2](C)[C@H](C)CC3                        | 6.77 |
| O=C(C(C1)[C@2]([H])[C@@31[C@@H](C)[C@H](O)[C@](C)(C=C)[C@@H](OC(CSC4CCN(C(CCN5C=NC6=C5N=CN=C6N7CC(N)CC7)=O)CC4)=O)[C@2](C)[C@H](C)CC3                       | 6.77 |
| O=C(C(C1)[C@2]([H])[C@@31[C@@H](C)[C@H](O)[C@](C)(C=C)[C@@H](OC(CSCC4=CC(C(O)=C(CO)O4)=O)=O)[C@2](C)[C@H](C)CC3                                             | 6.77 |
| O=C(C(C1)[C@2]([H])[C@@31[C@@H](C)[C@H](O)[C@](C)(C=C)[C@@H](OC(CSC4=C(NC(CN5CCN(C6=CC=CC(O)=C6)CC5)=O)C=CC=C4)=O)[C@2](C)[C@H](C)CC3                       | 6.75 |
| CC1C23C(C(CCC)=O)C(C(C(C(C=C)C)C1O)OC(CN4CCN(C(CN5CCN(C6=CC=C([N+](O-)=O)C=C6)CC5)=O)CC4)=O)(C(C2)C)C                                                       | 6.74 |
| CC1C23C(C(CCC)=O)C(C(C(C(C=C)C)C1O)OC(CN4CCN(C(CN5CCN(C6=CC=C(C1)C=C6)CC5)=O)CC4)=O)(C(C2)C)C                                                               | 6.74 |
| O=C(C(C1)[C@2]([H])[C@@31[C@@H](C)[C@H](O)[C@](C)(C=C)[C@@H](OC(N(C4)C(C5=C4C=CC(N)=C5)=O)=O)[C@2](C)[C@H](C)CC3                                            | 6.73 |
| O=C(C(C1)[C@2]([H])[C@@31[C@@H](C)[C@H](O)[C@](C)(C=C)[C@@H](OC(CSCC4=C5C(NC(CN5CCN(CCO)CC5)=O)N4)=O)[C@2](C)[C@H](C)CC3                                    | 6.73 |
| O=C(C(C1)[C@2]([H])[C@@31[C@@H](C)[C@H](O)[C@](C)(C=C)[C@@H](OC(CSCC4=C5C(NC(CN5CCN(CCO)CC5)=O)N4)=O)[C@2](C)[C@H](C)CC3                                    | 6.73 |
| O=C(C(C1)[C@2]([H])[C@@31[C@@H](C)[C@H](O)[C@](C)(C=C)[C@@H](OC(CN4CCN(C(C=C/C5=C(F)C=CC(F)=C5)=O)CC4)=O)[C@2](C)[C@H](C)CC3                                | 6.73 |
| O=C(C(C1)[C@2]([H])[C@@31[C@@H](C)[C@H](O)[C@](C)(C=C)[C@@H](OC(CSC4=CC(CO)=CC=C4)=O)[C@2](C)[C@H](C)CC3                                                    | 6.73 |
| O=C(C(C1)[C@2]([H])[C@@31[C@@H](C)[C@H](O)[C@](C)(C=C)[C@@H](OC(N4C(C(C=C5N)=C5N)=O)O)[C@2](C)[C@H](C)CC3                                                   | 6.72 |
| O=C(C(C1)[C@2]([H])[C@@31[C@@H](C)[C@H](O)[C@](C)(C=C)[C@@H](OC(N4C(C(C=C5N)=C5N)=O)O)[C@2](C)[C@H](C)CC3                                                   | 6.72 |
| O=C1CC[C@2](CC[C@H]3C)[C@1]([H])[C@3](C)[C@H](OC(CSC4=NC(N)=CC(NC(CN5CCC[C@H](CO)C5)=O)N4)=O)C[C@@](C)(C=C)[C@@H](O)[C@@H]2C                                | 6.72 |
| O=C(C(C1)[C@2]([H])[C@@31[C@@H](C)[C@H](O)[C@](C)(C=C)[C@@H](OC(CSC4=NC(NC(CN5CCC[C@H](CO)C5)=O)CC(N)=N4)=O)[C@2](C)[C@H](C)CC3                             | 6.72 |
| O=C1CC[C@2](CC[C@H]3C)[C@1]([H])[C@3](C)[C@H](OC(CSC4=NC(NC=CC5)=C5C(NC(CN6CCCC6)=O)N4)=O)C[C@@](C)(C=C)[C@@H](O)[C@@H]2C                                   | 6.72 |
| O=C1CC[C@2](CC[C@H]3C)[C@1]([H])[C@3](C)[C@H](OC(CSC4=NC(N5CC[C@H](O)C5)=CC(C)=N4)=O)C[C@@](C)(C=C)[C@@H](O)[C@@H]2C                                        | 6.72 |
| O=C1CC[C@2](CC[C@H]3C)[C@1]([H])[C@3](C)[C@H](OC(CSC4=NC(N5CCOCC5)=CC(C)=N4)=O)C[C@@](C)(C=C)[C@@H](O)[C@@H]2C                                              | 6.72 |
| O=C(C(C1)[C@2]([H])[C@@31[C@@H](C)[C@H](O)[C@](C)(C=C)[C@@H](OC(CSCC4=C5C(NC(CN5CCC(O)C5)=O)N4)=O)[C@2](C)[C@H](C)CC3                                       | 6.71 |
| O=C(C(C1)[C@2]([H])[C@@31[C@@H](C)[C@H](O)[C@](C)(C=C)[C@@H](OC(CSCC4=C5C(NC(CN5[C@H](CO)CC5)=O)N4)=O)[C@2](C)[C@H](C)CC3                                   | 6.71 |
| O=C(C(C1)[C@2]([H])[C@@31[C@@H](C)[C@H](O)[C@](C)(C=C)[C@@H](OC(CN4CCN(CNCC5=CC=C(C(F)F)C=C5)=O)CC4)=O)[C@2](C)[C@H](C)CC3                                  | 6.71 |
| O=C(C(C1)[C@2]([H])[C@@31[C@@H](C)[C@H](O)[C@](C)(C=C)[C@@H](OC(CSC4=C(N)C=NC=C4)=O)[C@2](C)[C@H](C)CC3                                                     | 6.71 |
| O=C(C(C1)[C@2]([H])[C@@31[C@@H](C)[C@H](O)[C@](C)(C=C)[C@@H](OC(CSC4=CC(N)=NC=C4)=O)[C@2](C)[C@H](C)CC3                                                     | 6.71 |
| O=C(C(C1)[C@2]([H])[C@@31[C@@H](C)[C@H](O)[C@](C)(C=C)[C@@H](OC(CSCC4=C5C(NC(C5=CC=C(OC)C=C5)=O)N4)=O)[C@2](C)[C@H](C)CC3                                   | 6.71 |
| O=C1CC[C@2](CC[C@H]3C)[C@1]([H])[C@3](C)[C@H](OC(CSC4=NC(N5CCCC5)=CC(C)=N4)=O)C[C@@](C)(C=C)[C@@H](O)[C@@H]2C                                               | 6.70 |
| O=C1CC[C@2](CC[C@H]3C)[C@1]([H])[C@3](C)[C@H](OC(CSC4=NC(N)=CC(NC(CN5CC[C@H](O)C5)=O)N4)=O)C[C@@](C)(C=C)[C@@H](O)[C@@H]2C                                  | 6.70 |
| O=C(C(C1)[C@2]([H])[C@@31[C@@H](C)[C@H](O)[C@](C)(C=C)[C@@H](OC(CSC4=NC(NC(CN5C[C@H](O)CC5)=O)CC(N)=N4)=O)[C@2](C)[C@H](C)CC3                               | 6.70 |
| O=C(C(C1)[C@2]([H])[C@@31[C@@H](C)[C@H](O)[C@](C)(C=C)[C@@H](OC(CSC4=NC=CC=N4)=O)[C@2](C)[C@H](C)CC3                                                        | 6.70 |
| O=C(C(C1)[C@2]([H])[C@@31[C@@H](C)[C@H](O)[C@](C)(C=C)[C@@H](OC(CSC4=CC(NC(CN5CCC[C@H]5CO)=O)CN=C4)=O)[C@2](C)[C@H](C)CC3                                   | 6.70 |
| O=C(C(C1)[C@2]([H])[C@@31[C@@H](C)[C@H](O)[C@](C)(C=C)[C@@H](OC(CSC4=CC=NC=C4)=O)[C@2](C)[C@H](C)CC3                                                        | 6.70 |
| O=C(C(C1)[C@2]([H])[C@@31[C@@H](C)[C@H](O)[C@](C)(C=C)[C@@H](OC(CSC4=C(NC(CN5CCC(O)C5)=O)C=CC=C4)=O)[C@2](C)[C@H](C)CC3                                     | 6.70 |
| O=C(C(C1)[C@2]([H])[C@@31[C@@H](C)[C@H](O)[C@](C)(C=C)[C@@H](OC(CN4N=NC(C5=CC=C(CN(C6)=O)C=C(C6)=O)C=C5)=C4)=O)[C@2](C)[C@H](C)CC3                          | 6.69 |
| O=C(C(C1)[C@2]([H])[C@@31[C@@H](C)[C@H](O)[C@](C)(C=C)[C@@H](OC(CSC4=C(NC(CN5CCC(O)C5)=O)C=CC=C4)=O)[C@2](C)[C@H](C)CC3                                     | 6.69 |
| O=C(C(C1)[C@2]([H])[C@@31[C@@H](C)[C@H](O)[C@](C)(C=C)[C@@H](OC(CSC4=C(NC(C5=CC=CC(F)=C5)=O)C=CC=C4)=O)[C@2](C)[C@H](C)CC3                                  | 6.68 |
| O=C(C(C1)[C@2]([H])[C@@31[C@@H](C)[C@H](O)[C@](C)(C=C)[C@@H](OC(CSC4=CC(NC(CN5CCCC5)=O)CN=C4)=O)[C@2](C)[C@H](C)CC3                                         | 6.68 |
| O=C(C(C1)[C@2]([H])[C@@31[C@@H](C)[C@H](O)[C@](C)(C=C)[C@@H](OC(CSC4=NN(C(C5=CC=C(C)C=C5)=O)C(N)=N4)=O)[C@2](C)[C@H](C)CC3                                  | 6.68 |
| O=C(C(C1)[C@2]([H])[C@@31[C@@H](C)[C@H](O)[C@](C)(C=C)[C@@H](OC(CN4CCN(C(C=C/C5=CC=C(C)C=C5)=O)CC4)=O)[C@2](C)[C@H](C)CC3                                   | 6.68 |
| O=C(C(C1)[C@2]([H])[C@@31[C@@H](C)[C@H](O)[C@](C)(C=C)[C@@H](OC(CSC4=CC(NC(C(C5=CC=CC(C)C=C5)N4)=O)O)[C@2](C)[C@H](C)CC3                                    | 6.67 |
| O=C(C(C1)[C@2]([H])[C@@31[C@@H](C)[C@H](O)[C@](C)(C=C)[C@@H](OC(CSC4=NN=C(C5=CC=CC([N+](O-)=O)C=C5)O4)=O)[C@2](C)[C@H](C)CC3                                | 6.67 |
| O=C(C(C1)[C@2]([H])[C@@31[C@@H](C)[C@H](O)[C@](C)(C=C)[C@@H](OC(CS(SC4=NC5=C(C=C=CC(C5)O4)=O)O)[C@2](C)[C@H](C)CC3                                          | 6.67 |
| O=C(C(C1)[C@2]([H])[C@@31[C@@H](C)[C@H](O)[C@](C)(C=C)[C@@H](OC(CSC4=NN=C(C5=CC=CC([N+](O-)=O)C=C5)N4)=O)[C@2](C)[C@H](C)CC3                                | 6.67 |
| O=C(C(C1)[C@2]([H])[C@@31[C@@H](C)[C@H](O)[C@](C)(C=C)[C@@H](OC(CSC4=NN=C(C5=CC=C(C(N)C=C5)O4)=O)O)[C@2](C)[C@H](C)CC3                                      | 6.67 |
| O=C(C(C1)[C@2]([H])[C@@31[C@@H](C)[C@H](O)[C@](C)(C=C)[C@@H](OC(CSC4=NN=C(C5=CC=CC(C)C=C5)N4)=O)[C@2](C)[C@H](C)CC3                                         | 6.66 |
| O=C(C(C1)[C@2]([H])[C@@31[C@@H](C)[C@H](O)[C@](C)(C=C)[C@@H](OC(CSC4=NN=C(C5=CC=CC(C)C=C5)N4)=O)[C@2](C)[C@H](C)CC3                                         |      |

|                                                                                                                                                    |      |
|----------------------------------------------------------------------------------------------------------------------------------------------------|------|
| O=C(CC1)[C@2]([H])[C@@31][C@@H](C)[C@H](O)[C@](C)(C=C)C[C@@H](OC(CSCCNC(C4=C(C)C=CC=C4)=O)=O)[C@2](C)[C@H](C)CC3                                   | 6.65 |
| O=C(CC1)[C@2]([H])[C@@31][C@@H](C)[C@H](O)[C@](C)(C=C)C[C@@H](OC(CSCCNC(C4=CC=C(C)C=C4)=O)=O)[C@2](C)[C@H](C)CC3                                   | 6.65 |
| O=C(CC1)[C@2]([H])[C@@31][C@@H](C)[C@H](O)[C@](C)(C=C)C[C@@H](OC(CSC4=NN=C(C5=CC=CC(F)=C5)N4)=O)[C@2](C)[C@H](C)CC3                                | 6.65 |
| O=C(CC1)[C@2]([H])[C@@31][C@@H](C)[C@H](O)[C@](C)(C=C)C[C@@H](OC(CSC4=NN=C(C5=CC=C(F)C=C5)N4)=O)[C@2](C)[C@H](C)CC3                                | 6.65 |
| O=C(CC1)[C@2]([H])[C@@31][C@@H](C)[C@H](O)[C@](C)(C=C)C[C@@H](OC(CNC4=CC=CC(Br)=C4)=O)[C@2](C)[C@H](C)CC3                                          | 6.65 |
| O=C(CC1)[C@2]([H])[C@@31][C@@H](C)[C@H](O)[C@](C)(C=C)C[C@@H](OC(CNC4=CC=C(Br)C=C4)=O)[C@2](C)[C@H](C)CC3                                          | 6.65 |
| O=C(CC1)[C@2]([H])[C@@31][C@@H](C)[C@H](O)[C@](C)(C=C)C[C@@H](OC(CSC4=NN=C(C5=CC=CC(C5O)O4)=O)[C@2](C)[C@H](C)CC3                                  | 6.65 |
| O=C(CC1)[C@2]([H])[C@@31][C@@H](C)[C@H](O)[C@](C)(C=C)C[C@@H](OC(CSC4=NN=C(C5=CC=C(O)C=C5)O4)=O)[C@2](C)[C@H](C)CC3                                | 6.65 |
| O=C(CC1)[C@2]([H])[C@@31][C@@H](C)[C@H](O)[C@](C)(C=C)C[C@@H](OC(CSC4=NN=C(C5=CC=C(N)C=C5)O4)=O)[C@2](C)[C@H](C)CC3                                | 6.65 |
| O=C(CC1)[C@2]([H])[C@@31][C@@H](C)[C@H](O)[C@](C)(C=C)C[C@@H](OC(CSC4=NN=C(C5=CC=CC(C)C=C5)O4)=O)[C@2](C)[C@H](C)CC3                               | 6.65 |
| O=C(CC1)[C@2]([H])[C@@31][C@@H](C)[C@H](O)[C@](C)(C=C)C[C@@H](OC(CSC4=NN=C(C5=CC=C(C)C=C5)N4)=O)[C@2](C)[C@H](C)CC3                                | 6.64 |
| O=C(CC1)[C@2]([H])[C@@31][C@@H](C)[C@H](O)[C@](C)(C=C)C[C@@H](OC(CS(SC4=NC(O)=CC(C)=N4)=O)=O)[C@2](C)[C@H](C)CC3                                   | 6.64 |
| O=C1CC[C@2](CC[C@H]3C)[C@1]([H])[C@3](C)[C@H](OC(CSC4=NC(O)=CC(NC(C)=O)=N4)=O)C[C@@](C)(C=C)[C@@H](O)[C@@H]2C                                      | 6.64 |
| O=C(CC1)[C@2]([H])[C@@31][C@@H](C)[C@H](O)[C@](C)(C=C)C[C@@H](OC(CSC4=NN=C(C5=CC=C55)O4)=O)[C@2](C)[C@H](C)CC3                                     | 6.64 |
| O=C(CC1)[C@2]([H])[C@@31][C@@H](C)[C@H](O)[C@](C)(C=C)C[C@@H](OC(CSC4=NN=C(C5=CC=NC=C5)O4)=O)[C@2](C)[C@H](C)CC3                                   | 6.64 |
| O=C(CC1)[C@2]([H])[C@@31][C@@H](C)[C@H](O)[C@](C)(C=C)C[C@@H](OC(CN4CCN(C5=CC=C(C)C=C5)CC4)=O)[C@2](C)[C@H](C)CC3                                  | 6.63 |
| O=C(CC1)[C@2]([H])[C@@31][C@@H](C)[C@H](O)[C@](C)(C=C)C[C@@H](OC(CSC4=NN=C(C5=CC=CO5)O4)=O)[C@2](C)[C@H](C)CC3                                     | 6.63 |
| O=C(CC1)[C@2]([H])[C@@31][C@@H](C)[C@H](O)[C@](C)(C=C)C[C@@H](OC(CN4CCN(C5=CC=CC=C5)CC4)=O)[C@2](C)[C@H](C)CC3                                     | 6.62 |
| O=C(CC1)[C@2]([H])[C@@31][C@@H](C)[C@H](O)[C@](C)(C=C)C[C@@H](OC(CSC4=CC(C=NO)=CC=N4)=O)[C@2](C)[C@H](C)CC3                                        | 6.61 |
| O=C(CC1)[C@2]([H])[C@@31][C@@H](C)[C@H](O)[C@](C)(C=C)C[C@@H](OC(CSC4=NC=NC5=C4C=NN5)=O)[C@2](C)[C@H](C)CC3                                        | 6.61 |
| O=C(CC1)[C@2]([H])[C@@31][C@@H](C)[C@H](O)[C@](C)(C=C)C[C@@H](OC(CSC4=NC=NC5=C4C=NN5)=O)[C@2](C)[C@H](C)CC3                                        | 6.61 |
| O=C(CC1)[C@2]([H])[C@@31][C@@H](C)[C@H](O)[C@](C)(C=C)C[C@@H](OC(CNC4=CC=CC(Cl)=C4)=O)[C@2](C)[C@H](C)CC3                                          | 6.61 |
| O=C(CC1)[C@2]([H])[C@@31][C@@H](C)[C@H](O)[C@](C)(C=C)C[C@@H](OC(CNC4=CC=C(Cl)C=C4)=O)[C@2](C)[C@H](C)CC3                                          | 6.61 |
| O=C(CC1)[C@2]([H])[C@@31][C@@H](C)[C@H](O)[C@](C)(C=C)C[C@@H](OC(CSCC4=C5C(N)=N4)=O)[C@2](C)[C@H](C)CC3                                            | 6.61 |
| O=C(CC1)[C@2]([H])[C@@31][C@@H](C)[C@H](O)[C@](C)(C=C)C[C@@H](OC(CSC4=NC(N)=CC(O)=N4)=O)[C@2](C)[C@H](C)CC3                                        | 6.61 |
| O=C1CC[C@2](CC[C@H]3C)[C@1]([H])[C@3](C)[C@H](OC(CSC4=NC(N)=CC(N)=N4)=O)C[C@@](C)(C=C)[C@@H](O)[C@@H]2C                                            | 6.60 |
| O=C(CC1)[C@2]([H])[C@@31][C@@H](C)[C@H](O)[C@](C)(C=C)C[C@@H](OC(CSC4=NC(N)=CC(N)=N4)=O)[C@2](C)[C@H](C)CC3                                        | 6.60 |
| O=C(CC1)[C@2]([H])[C@@31][C@@H](C)[C@H](O)[C@](C)(C=C)C[C@@H](OC(CSC4=C(CO)C=CC=N4)=O)[C@2](C)[C@H](C)CC3                                          | 6.60 |
| O=C(CC1)[C@2]([H])[C@@31][C@@H](C)[C@H](O)[C@](C)(C=C)C[C@@H](OC(N4C(C(C=C(F)C=C5)=C5C4)=O)=O)[C@2](C)[C@H](C)CC3                                  | 6.60 |
| O=C(CC1)[C@2]([H])[C@@31][C@@H](C)[C@H](O)[C@](C)(C=C)C[C@@H](OC(CN4CCN(C/C=C/C5=CC=CC=C5[N+](I(O-))=O)=O)CC4)=O)[C@2](C)[C@H](C)CC3               | 6.60 |
| O=C(CC1)[C@2]([H])[C@@31][C@@H](C)[C@H](O)[C@](C)(C=C)C[C@@H](OC(CSC4=NC=CC(N)=N4)=O)[C@2](C)[C@H](C)CC3                                           | 6.59 |
| O=C(CC1)[C@2]([H])[C@@31][C@@H](C)[C@H](O)[C@](C)(C=C)C[C@@H](OC(CSC4=NC=CC(N)=N4)=O)[C@2](C)[C@H](C)CC3                                           | 6.59 |
| O=C(CC1)[C@2]([H])[C@@31][C@@H](C)[C@H](O)[C@](C)(C=C)C[C@@H](OC(N4C(C(C=CC=C5)=C5C4)=O)=O)[C@2](C)[C@H](C)CC3                                     | 6.58 |
| O=C(CC1)[C@2]([H])[C@@31][C@@H](C)[C@H](O)[C@](C)(C=C)C[C@@H](OC(CSC4CCN(C(CCN5C=NC6=C5N=C(N)N=C6N7CCOCC7)=O)CC4)=O)[C@2](C)[C@H](C)CC3            | 6.58 |
| O=C(CC1)[C@2]([H])[C@@31][C@@H](C)[C@H](O)[C@](C)(C=C)C[C@@H](OC(CN4CCN(C)CC4)=O)[C@2](C)[C@H](C)CC3                                               | 6.57 |
| O=C(CC1)[C@2]([H])[C@@31][C@@H](C)[C@H](O)[C@](C)(C=C)C[C@@H](OC(CSC4CCN(C(CCN5C=NC6=C5N=C(N)N=C6NC)=O)CC4)=O)[C@2](C)[C@H](C)CC3                  | 6.54 |
| O=C(CC1)[C@2]([H])[C@@31][C@@H](C)[C@H](O)[C@](C)(C=C)C[C@@H](OC(CSC4CCN(C(CCCN5C=NC6=C5N=C(N)N=C6)=O)CC4)=O)[C@2](C)[C@H](C)CC3                   | 6.53 |
| O=C(CC1)[C@2]([H])[C@@31][C@@H](C)[C@H](O)[C@](C)(C=C)C[C@@H](OC(CSC4=NC(C=CC(N)=C5)=C5N4)=O)[C@2](C)[C@H](C)CC3                                   | 6.53 |
| O=C(CC1)[C@2]([H])[C@@31][C@@H](C)[C@H](O)[C@](C)(C=C)C[C@@H](OC(CSC4CCN(C/C=C/N5C=NC6=C5N=C(N)N=C6)=O)CC4)=O)[C@2](C)[C@H](C)CC3                  | 6.52 |
| O=C(CC1)[C@2]([H])[C@@31][C@@H](C)[C@H](O)[C@](C)(C=C)C[C@@H](OC(CSCC4=CC(C(O)=CO4)=O)=O)[C@2](C)[C@H](C)CC3                                       | 6.52 |
| O=C(CC1)[C@2]([H])[C@@31][C@@H](C)[C@H](O)[C@](C)(C=C)C[C@@H](OC(CSC4=C([N+](I(O-))=O)C=CC=N4)=O)[C@2](C)[C@H](C)CC3                               | 6.52 |
| O=C(CC1)[C@2]([H])[C@@31][C@@H](C)[C@H](O)[C@](C)(C=C)C[C@@H](OC(CSC4=CC(NC(CN5CC[C@@H](O)C5)=O)=CN=C4)=O)[C@2](C)[C@H](C)CC3                      | 6.52 |
| O=C(CC1)[C@2]([H])[C@@31][C@@H](C)[C@H](O)[C@](C)(C=C)C[C@@H](OC(CSC4=C(CO)C=NC=C4)=O)[C@2](C)[C@H](C)CC3                                          | 6.51 |
| O=C(CC1)[C@2]([H])[C@@31][C@@H](C)[C@H](O)[C@](C)(C=C)C[C@@H](OC(CSC4CCN(C(CN5C=NC6=C5N=CN=C6)=O)CC4)=O)[C@2](C)[C@H](C)CC3                        | 6.50 |
| O=C(CC1)[C@2]([H])[C@@31][C@@H](C)[C@H](O)[C@](C)(C=C)C[C@@H](OC(CSC4=CC(NC([C@H]5CCCCN5)=O)=CN=C4)=O)[C@2](C)[C@H](C)CC3                          | 6.50 |
| O=C(CC1)[C@2]([H])[C@@31][C@@H](C)[C@H](O)[C@](C)(C=C)C[C@@H](OC(CSC4CCN(C(CCN5C=NC6=C5N=C(N)N=C6N7CCC(N(C)CC7)=O)CC4)=O)[C@2](C)[C@H](C)CC3       | 6.50 |
| O=C(CC1)[C@2]([H])[C@@31][C@@H](C)[C@H](O)[C@](C)(C=C)C[C@@H](OC(CSC4=C(NC(CN5N=NC(CN6CCN(C7=CC=CC(O)=C7)CC6)=C5)=O)C=CC=C4)=O)[C@2](C)[C@H](C)CC3 | 6.50 |
| O=C(CC1)[C@2]([H])[C@@31][C@@H](C)[C@H](O)[C@](C)(C=C)C[C@@H](OC(CSC4=CC(O)=CN=C4)=O)[C@2](C)[C@H](C)CC3                                           | 6.49 |
| O=C(CC1)[C@2]([H])[C@@31][C@@H](C)[C@H](O)[C@](C)(C=C)C[C@@H](OC(CSC4=CC(NC([C@H]5CCCN5)=O)=CN=C4)=O)[C@2](C)[C@H](C)CC3                           | 6.49 |
| O=C1CC[C@2](CC[C@H]3C)[C@1]([H])[C@3](C)[C@H](OC(CSC4=NC(N5CCN(CCO)CC5)=CC(C)=N4)=O)C[C@@](C)(C=C)[C@@H](O)[C@@H]2C                                | 6.49 |
| O=C1CC[C@2](CC[C@H]3C)[C@1]([H])[C@3](C)[C@H](OC(CSC4=NC(N5CCC(CCO)CC5)=CC(C)=N4)=O)C[C@@](C)(C=C)[C@@H](O)[C@@H]2C                                | 6.49 |
| O=C(CC1)[C@2]([H])[C@@31][C@@H](C)[C@H](O)[C@](C)(C=C)C[C@@H](OC(CSC(C4)CCN4C(CCN5C=NC6=C5N=C(N)N=C6N7CCNCC7)=O)=O)[C@2](C)[C@H](C)CC3             | 6.49 |
| O=C(CC1)[C@2]([H])[C@@31][C@@H](C)[C@H](O)[C@](C)(C=C)C[C@@H](OC(CSC4CCN(C(CCN5C=NC6=C5N=C(N)N=C6N7CC(C)NCC7)=O)CC4)=O)[C@2](C)[C@H](C)CC3         | 6.49 |
| O=C(CC1)[C@2]([H])[C@@31][C@@H](C)[C@H](O)[C@](C)(C=C)C[C@@H](OC(CSC4CCN(C(CCN5C=NC6=C5N=CN=C6N7CC(N(C)CC7)=O)CC4)=O)[C@2](C)[C@H](C)CC3           | 6.49 |
| O=C(CC1)[C@2]([H])[C@@31][C@@H](C)[C@H](O)[C@](C)(C=C)C[C@@H](OC(CSC4CCN(C(CCN5C=NC6=C5N=CN=C6N7CCC(NC)CC7)=O)CC4)=O)[C@2](C)[C@H](C)CC3           | 6.49 |
| O=C(CC1)[C@2]([H])[C@@31][C@@H](C)[C@H](O)[C@](C)(C=C)C[C@@H](OC(CSC4=CC(C(NC5=CC=C(S(O)N)C6=NC=C56)=O)C=C5)=O)=CC=C4)=O)[C@2](C)[C@H](C)CC3       | 6.48 |

|                                                                                                                                                        |      |
|--------------------------------------------------------------------------------------------------------------------------------------------------------|------|
| O=C(CC1)[C@]2([H])[C@@]31[C@@H](C)[C@H](O)[C@](C)(C=C)C[C@@H](OC(CSC4CCN(C(CCN5C=NC6=C5N=CN=C6N7CCC(N)CC7)=O)CC4)=O)[C@]2(C)[C@@H](C)CC3               | 6.48 |
| O=C(CC1)[C@]2([H])[C@@]31[C@@H](C)[C@H](O)[C@](C)(C=C)C[C@@H](OC(CS[C@H]4CC[C@H](C(OCC)=O)C[C@H]4NS(=O)(C5=CC=C(C(C)=O)C=C5)=O)=O)[C@]2(C)[C@@H](C)CC3 | 6.47 |
| O=C(CC1)[C@]2([H])[C@@]31[C@@H](C)[C@H](O)[C@](C)(C=C)C[C@@H](OC(CSC4CCN(C(CCN5C=NC6=C5N=CN=C6N7C[C@H](N)CC7)=O)CC4)=O)[C@]2(C)[C@@H](C)CC3            | 6.47 |
| O=C(CC1)[C@]2([H])[C@@]31[C@@H](C)[C@H](O)[C@](C)(C=C)C[C@@H](OC(CN4N=NC(C5=CC=C(CN6C7=NC=NC(N8CCN(C)CC8)=C7N=C6)C=C5)=C4)=O)[C@]2(C)[C@@H](C)CC3      | 6.47 |
| O=C(CC1)[C@]2([H])[C@@]31[C@@H](C)[C@H](O)[C@](C)(C=C)C[C@@H](OC(CS[C@H]4CC[C@H](C(OCC)=O)C[C@H]4NS(=O)(C5=CC=C(OC)C=C5)=O)=O)[C@]2(C)[C@@H](C)CC3     | 6.47 |
| O=C(CC1)[C@]2([H])[C@@]31[C@@H](C)[C@H](O)[C@](C)(C=C)C[C@@H](OC(CSCCCN(C(CCN4C=NC5=C4N=CN=C5N6CCC(N)C6)=O)C=O)[C@]2(C)[C@@H](C)CC3                    | 6.46 |
| O=C1CC[C@]2(CC[C@H]3C)[C@]1([H])[C@]3(C)[C@H](OC(CSC4=NC(N5CCC[C@H](CO)C5)=CC(C)=N4)=O)C[C@@](C)(C=C)[C@@H](O)[C@@H]2C                                 | 6.46 |
| O=C(N(CCN1CC(O[C@@H]([C@]2(C)[C@H](C)CC3)C[C@@](C)(C=C)[C@@H](O)[C@H](C)[C@@]43[C@@]2([H])C(CC4)=O)=O)[C@H](CC5=CC=C(O)C=C5)NC(OC(C)C)C)=O             | 6.45 |
| O=C(CC1)[C@]2([H])[C@@]31[C@@H](C)[C@H](O)[C@](C)(C=C)C[C@@H](OC(CN4N=NC(C5=CC=C(CN6C7=NC=NC(N(C)CC)=C7N=C6)C=C5)=C4)=O)[C@]2(C)[C@@H](C)CC3           | 6.45 |
| O=C(CC1)[C@]2([H])[C@@]31[C@@H](C)[C@H](O)[C@](C)(C=C)C[C@@H](OC(CSC4=C(NC(CN5N=NC(CN6CCN(C)CC6)=C5)=O)C=CC=C4)=O)[C@]2(C)[C@@H](C)CC3                 | 6.45 |
| O=C1CC[C@]2(CC[C@H]3C)[C@]1([H])[C@]3(C)[C@H](OC(CSC4=NC(N5CCC[C@@H](O)C5)=CC(C)=N4)=O)C[C@@](C)(C=C)[C@@H](O)[C@@H]2C                                 | 6.45 |
| O=C1CC[C@]2(CC[C@H]3C)[C@]1([H])[C@]3(C)[C@H](OC(CSC4=NC(N5CCC(O)CC5)=CC(C)=N4)=O)C[C@@](C)(C=C)[C@@H](O)[C@@H]2C                                      | 6.45 |
| O=C(CC1)[C@]2([H])[C@@]31[C@@H](C)[C@H](O)[C@](C)(C=C)C[C@@H](OC(CN4CCN(C(CN5CCN(C6=CC=CC=C6[N+](O-)=O)CC5)=O)CC4)=O)[C@]2(C)[C@@H](C)CC3              | 6.44 |
| O=C(CC1)[C@]2([H])[C@@]31[C@@H](C)[C@H](O)[C@](C)(C=C)C[C@@H](OC(CN4CCN(C(CN5CCN(C6=CC=CC([N+](O-)=O)=C6)CC5)=O)CC4)=O)[C@]2(C)[C@@H](C)CC3            | 6.44 |
| CC1C23C(C(CC3)=O)C(C(CC(C=C)(C)C1O)OC(CN4CCN(C(CN5CCN(C6=CC([N+](O-)=O)=CC=C6)CC5)=O)CC4)=O)(C(CC2)C)C                                                 | 6.44 |
| O=C(CC1)[C@]2([H])[C@@]31[C@@H](C)[C@H](O)[C@](C)(C=C)C[C@@H](OC(CSC4=C(NC(CN5CCN(C6=CC=CC=C6)CC5)=O)C=CC=C4)=O)[C@]2(C)[C@@H](C)CC3                   | 6.44 |
| O=C(CC1)[C@]2([H])[C@@]31[C@@H](C)[C@H](O)[C@](C)(C=C)C[C@@H](OC(CN4CCN(C(CN5CCN(C6=CC=C(Cl)C=C6)CC5)=O)CC4)=O)[C@]2(C)[C@@H](C)CC3                    | 6.44 |
| CC1C23C(C(CC3)=O)C(C(CC(C=C)(C)C1O)OC(CN4CCN(C(CN5CCN(C6=CC(Cl)=CC=C6)CC5)=O)CC4)=O)(C(CC2)C)C                                                         | 6.44 |
| O=C1CC[C@]2(CC[C@H]3C)[C@]1([H])[C@]3(C)[C@H](OC(CSC4=NC(NC=C5)=C5C(NC(CN6CCC(CO)CC6)=O)=N4)=O)C[C@@](C)(C=C)[C@@H](O)[C@@H]2C                         | 6.44 |
| O=C(CC1)[C@]2([H])[C@@]31[C@@H](C)[C@H](O)[C@](C)(C=C)C[C@@H](OC(CSC4=C(NC(CN5N=NC(CN(C)CC)=C5)=O)C=CC=C4)=O)[C@]2(C)[C@@H](C)CC3                      | 6.43 |
| CC1C23C(C(CC3)=O)C(C(CC(C=C)(C)C1O)OC(CN4CCN(C(CN5CCN(C6=CC(OC)=CC=C6)CC5)=O)CC4)=O)(C(CC2)C)C                                                         | 6.43 |
| O=C(CC1)[C@]2([H])[C@@]31[C@@H](C)[C@H](O)[C@](C)(C=C)C[C@@H](OC(CSC4=C(NC(CN5N=NC(CN6CCCC6)=C5)=O)C=CC=C4)=O)[C@]2(C)[C@@H](C)CC3                     | 6.43 |
| O=C(CC1)[C@]2([H])[C@@]31[C@@H](C)[C@H](O)[C@](C)(C=C)C[C@@H](OC(CN4CCN(C(C=C(C5=C(F)C=C(Br)C=C5)=O)CC4)=O)[C@]2(C)[C@@H](C)CC3                        | 6.43 |
| O=C1CC[C@]2(CC[C@H]3C)[C@]1([H])[C@]3(C)[C@H](OC(CSC4=NC(NC=C5)=C5C(NC(CN6CCC(O)CC6)=O)=N4)=O)C[C@@](C)(C=C)[C@@H](O)[C@@H]2C                          | 6.43 |
| O=C(CC1)[C@]2([H])[C@@]31[C@@H](C)[C@H](O)[C@](C)(C=C)C[C@@H](OC(CN4CCN(C(CN5CCN(C6=CC=CC(O)=C6)CC5)=O)CC4)=O)[C@]2(C)[C@@H](C)CC3                     | 6.42 |
| O=C(CC1)[C@]2([H])[C@@]31[C@@H](C)[C@H](O)[C@](C)(C=C)C[C@@H](OC(CN4N=NC(C5=CC=C(CN6C(C(C=CC=C7)=C7C6=O)=O)C=C5)=C4)=O)[C@]2(C)[C@@H](C)CC3            | 6.42 |
| CC1C23C(C(CC3)=O)C(C(CC(C=C)(C)C1O)OC(CN4CCN(C(CN5CCN(C6=C(C)C=CC=C6)CC5)=O)CC4)=O)(C(CC2)C)C                                                          | 6.42 |
| CC1C23C(C(CC3)=O)C(C(CC(C=C)(C)C1O)OC(CN4CCN(C(CN5CCN(C6=CC=C(C)C=C6)CC5)=O)CC4)=O)(C(CC2)C)C                                                          | 6.42 |
| O=C(CC1)[C@]2([H])[C@@]31[C@@H](C)[C@H](O)[C@](C)(C=C)C[C@@H](OC(CSCC(NC4=CC=C(NCC5=CC=CC=C5)C=C4)=O)=O)[C@]2(C)[C@@H](C)CC3                           | 6.42 |
| O=C(CC1)[C@]2([H])[C@@]31[C@@H](C)[C@H](O)[C@](C)(C=C)C[C@@H](OC(CSC4=NN=C(C)N4/N=C/C5=CC=C(C6=CC=CC=N6)C=C5)=O)[C@]2(C)[C@@H](C)CC3                   | 6.42 |
| O=C(CC1)[C@]2([H])[C@@]31[C@@H](C)[C@H](O)[C@](C)(C=C)C[C@@H](OC(CSCC4=CSC(NC(C5=CC=CC=C5[N+](O-)=O)=O)=N4)=O)[C@]2(C)[C@@H](C)CC3                     | 6.42 |
| O=C1CC[C@]2(CC[C@H]3C)[C@]1([H])[C@]3(C)[C@H](OC(CSC4=NC(NC=C5)=C5C(NC(CN6CCOCC6)=O)=N4)=O)C[C@@](C)(C=C)[C@@H](O)[C@@H]2C                             | 6.42 |
| O=C(CC1)[C@]2([H])[C@@]31[C@@H](C)[C@H](O)[C@](C)(C=C)C[C@@H](OC(CN4N=NC(C5=CC=CC(CN6C7=NC=NC(N)=C7N=C6)C=C5)=C4)=O)[C@]2(C)[C@@H](C)CC3               | 6.42 |
| O=C(CC1)[C@]2([H])[C@@]31[C@@H](C)[C@H](O)[C@](C)(C=C)C[C@@H](OC(CSC4=C(NC(CN5N=NC(CN(C)C)=C5)=O)C=CC=C4)=O)[C@]2(C)[C@@H](C)CC3                       | 6.42 |
| CC1C23C(C(CC3)=O)C(C(CC(C=C)(C)C1O)OC(CN4CCN(C(CN5CCN(C6=CC=CC=C6)CC5)=O)CC4)=O)(C(CC2)C)C                                                             | 6.41 |
| O=C1CC[C@]2(CC[C@H]3C)[C@]1([H])[C@]3(C)[C@H](OC(CSC4=NC(N5CCNCC5)=CC(C)=N4)=O)C[C@@](C)(C=C)[C@@H](O)[C@@H]2C                                         | 6.41 |
| O=C1CC[C@]2(CC[C@H]3C)[C@]1([H])[C@]3(C)[C@H](OC(CSCC(NC4=CC=C(NCC5=CC=CC=C5)C=C4)=O)=O)C[C@@](C)(C=C)[C@@H](O)[C@@H]2C                                | 6.41 |
| O=C1CC[C@]2(CC[C@H]3C)[C@]1([H])[C@]3(C)[C@H](OC(CSC4=NC(N)=CC(NC(CN5CCC(O)CC5)=O)=N4)=O)C[C@@](C)(C=C)[C@@H](O)[C@@H]2C                               | 6.41 |
| O=C(CC1)[C@]2([H])[C@@]31[C@@H](C)[C@H](O)[C@](C)(C=C)C[C@@H](OC(CSC4=NC(NC(CN5CCC(O)CC5)=O)=CC(N)=N4)=O)[C@]2(C)[C@@H](C)CC3                          | 6.41 |
| O=C(CC1)[C@]2([H])[C@@]31[C@@H](C)[C@H](O)[C@](C)(C=C)C[C@@H](OC(N4CC5=C(C=CC=C5OCCN6C7=CC=CN=C7N=C6)C4=O)=O)[C@]2(C)[C@@H](C)CC3                      | 6.41 |
| O=C(CC1)[C@]2([H])[C@@]31[C@@H](C)[C@H](O)[C@](C)(C=C)C[C@@H](OC(CSC4=NC=CN=C4)=O)[C@]2(C)[C@@H](C)CC3                                                 | 6.40 |
| O=C1CC[C@]2(CC[C@H]3C)[C@]1([H])[C@]3(C)[C@H](OC(CSC4=NC(N)=CC(NC(CN5CCOCC5)=O)=N4)=O)C[C@@](C)(C=C)[C@@H](O)[C@@H]2C                                  | 6.40 |
| O=C(CC1)[C@]2([H])[C@@]31[C@@H](C)[C@H](O)[C@](C)(C=C)C[C@@H](OC(CSC4=NC(NC(CN5CCOCC5)=O)=CC(N)=N4)=O)[C@]2(C)[C@@H](C)CC3                             | 6.40 |
| O=C1CC[C@]2(CC[C@H]3C)[C@]1([H])[C@]3(C)[C@H](OC(CSC4=NC(N)=CC(NC(CN5CCCC5)=O)=N4)=O)C[C@@](C)(C=C)[C@@H](O)[C@@H]2C                                   | 6.40 |
| O=C(CC1)[C@]2([H])[C@@]31[C@@H](C)[C@H](O)[C@](C)(C=C)C[C@@H](OC(CSC4=NC(NC(CN5CCCC5)=O)=CC(N)=N4)=O)[C@]2(C)[C@@H](C)CC3                              | 6.40 |
| O=C(CC1)[C@]2([H])[C@@]31[C@@H](C)[C@H](O)[C@](C)(C=C)C[C@@H](OC(CSCC4=CSC(NC(C5=CC=CC=C5)=O)=N4)=O)[C@]2(C)[C@@H](C)CC3                               | 6.40 |
| O=C1CC[C@]2(CC[C@H]3C)[C@]1([H])[C@]3(C)[C@H](OC(CN4CCN(C(NCC5=CC=C([N+](O-)=O)C=C5)=O)CC4)=O)C[C@@](C)(C=C)[C@@H](O)[C@@H]2C                          | 6.40 |
| O=C(CC1)[C@]2([H])[C@@]31[C@@H](C)[C@H](O)[C@](C)(C=C)C[C@@H](OC(CSC4=C(NC(C5=CC=CC(Cl)=C5)=O)C=CC=C4)=O)[C@]2(C)[C@@H](C)CC3                          | 6.40 |
| O=C1CC[C@]2(CC[C@H]3C)[C@]1([H])[C@]3(C)[C@H](OC(CSC4=NC(NC=C5)=C5C(NC(CNC6CC6)=O)=N4)=O)C[C@@](C)(C=C)[C@@H](O)[C@@H]2C                               | 6.40 |
| O=C(CC1)[C@]2([H])[C@@]31[C@@H](C)[C@H](O)[C@](C)(C=C)C[C@@H](OC(CSCC4=CSC(NC(CN(C)CCO)=O)=N4)=O)[C@]2(C)[C@@H](C)CC3                                  | 6.40 |

|                                                                                                                                 |      |
|---------------------------------------------------------------------------------------------------------------------------------|------|
| O=C(C(C1)[C@2](H)[C@@31][C@@H](C)[C@H](O)[C@](C)(C=C)C[C@@H](OC(CSC4=CSC(NC(CN5CCCC5)=O)=N4)=O)[C@2](C)[C@H](C)CC3              | 6.39 |
| O=C(C(C1)[C@2](H)[C@@31][C@@H](C)[C@H](O)[C@](C)(C=C)C[C@@H](OC(CSC4=NN=C(C5=CC=CC(Br)=C5)O4)=O)[C@2](C)[C@H](C)CC3             | 6.39 |
| O=C(C(C1)[C@2](H)[C@@31][C@@H](C)[C@H](O)[C@](C)(C=C)C[C@@H](OC(CSC4=CC(C(O)=C(CN5CCCCC5)O4)=O)=O)[C@2](C)[C@H](C)CC3           | 6.39 |
| O=C(C(C1)[C@2](H)[C@@31][C@@H](C)[C@H](O)[C@](C)(C=C)C[C@@H](OC(CSC4=NN(C(C5=CC=CC(CI)=C5)=O)(C(N)=N4)=O)[C@2](C)[C@H](C)CC3    | 6.39 |
| O=C(C(C1)[C@2](H)[C@@31][C@@H](C)[C@H](O)[C@](C)(C=C)C[C@@H](OC(CSC4=NN=C(NC(C5=CC=CC(N)=C5)=O)S4)=O)[C@2](C)[C@H](C)CC3        | 6.39 |
| O=C(C(C1)[C@2](H)[C@@31][C@@H](C)[C@H](O)[C@](C)(C=C)C[C@@H](OC(CSC4=NN(C(C5=CC=C(OC)=C5)=O)(C(N)=N4)=O)[C@2](C)[C@H](C)CC3     | 6.39 |
| O=C(C(C1)[C@2](H)[C@@31][C@@H](C)[C@H](O)[C@](C)(C=C)C[C@@H](OC(CSC4=NN(C(C5=CC=CC(CO)=C5)=O)(C(N)=N4)=O)[C@2](C)[C@H](C)CC3    | 6.39 |
| O=C(C(C1)[C@2](H)[C@@31][C@@H](C)[C@H](O)[C@](C)(C=C)C[C@@H](OC(CSC4=NN(C(C5=CC=CC(CO)=C5)=O)(C(N)=N4)=O)[C@2](C)[C@H](C)CC3    | 6.39 |
| O=C(C(C1)[C@2](H)[C@@31][C@@H](C)[C@H](O)[C@](C)(C=C)C[C@@H](OC(CSC4=NN=C(C5=CC=CC(CO)=C5)=O)(C(N)=N4)=O)[C@2](C)[C@H](C)CC3    | 6.38 |
| O=C(C(C1)[C@2](H)[C@@31][C@@H](C)[C@H](O)[C@](C)(C=C)C[C@@H](OC(CSC4=C(NC(C5=C(C)C)=CC=C5)=O)C=CC=C4)=O)[C@2](C)[C@H](C)CC3     | 6.38 |
| O=C(C(C1)[C@2](H)[C@@31][C@@H](C)[C@H](O)[C@](C)(C=C)C[C@@H](OC(CSC4=CC(NC([C@@H](N)[C@@H](C)CC)=O)CN=C4)=O)[C@2](C)[C@H](C)CC3 | 6.38 |
| O=C(C(C1)[C@2](H)[C@@31][C@@H](C)[C@H](O)[C@](C)(C=C)C[C@@H](OC(CSC(C)(C)CNC(C4=CC=C(OC)C=C4)=O)=O)[C@2](C)[C@H](C)CC3          | 6.38 |
| O=C(C(C1)[C@2](H)[C@@31][C@@H](C)[C@H](O)[C@](C)(C=C)C[C@@H](OC(CSC(C)(C)CNC(C4=CC=C(OC)C=C4)=O)=O)[C@2](C)[C@H](C)CC3          | 6.38 |
| O=C1CC[C@2](CC[C@H]3C)[C@1](H)[C@3](C)[C@H](OC(CSCC(NC4=CC=C(NCCO)C=C4)=O)=O)C[C@@](C)(C=C)[C@@H](O)[C@@H]2C                    | 6.38 |
| O=C1CC[C@2](CC[C@H]3C)[C@1](H)[C@3](C)[C@H](OC(CSCC(NC4=CC=C(NC(C)C)C=C4)=O)=O)C[C@@](C)(C=C)[C@@H](O)[C@@H]2C                  | 6.38 |
| O=C(C(C1)[C@2](H)[C@@31][C@@H](C)[C@H](O)[C@](C)(C=C)C[C@@H](OC(CSC4=NN(C(C5=CC=CC(F)=C5)=O)(C(N)=N4)=O)[C@2](C)[C@H](C)CC3     | 6.38 |
| O=C(C(C1)[C@2](H)[C@@31][C@@H](C)[C@H](O)[C@](C)(C=C)C[C@@H](OC(CSC(C)(C)CNC([C@H](C)C4=CC=CC=C4)=O)=O)[C@2](C)[C@H](C)CC3      | 6.38 |
| O=C(C(C1)[C@2](H)[C@@31][C@@H](C)[C@H](O)[C@](C)(C=C)C[C@@H](OC(CSC4=NN(C(CN5CCCC5)=O)C=CC=C4)=O)[C@2](C)[C@H](C)CC3            | 6.38 |
| O=C(C(C1)[C@2](H)[C@@31][C@@H](C)[C@H](O)[C@](C)(C=C)C[C@@H](OC(CSC4=NN=C(C)N4=N/C(C5=CC=C(O)C=C5)=O)[C@2](C)[C@H](C)CC3        | 6.38 |
| O=C(C(C1)[C@2](H)[C@@31][C@@H](C)[C@H](O)[C@](C)(C=C)C[C@@H](OC(CSC4=NN(C(C5=CC=CC(C)=C5)=O)(C(N)=N4)=O)[C@2](C)[C@H](C)CC3     | 6.38 |
| O=C(C(C1)[C@2](H)[C@@31][C@@H](C)[C@H](O)[C@](C)(C=C)C[C@@H](OC(N4C(C(C=C(N5CCC[C@H]5C(O)=O)C=C6=C6C4)=O)=O)[C@2](C)[C@H](C)CC3 | 6.37 |
| O=C(C(C1)[C@2](H)[C@@31][C@@H](C)[C@H](O)[C@](C)(C=C)C[C@@H](OC(CS(S(C4=NC5=C(C=CC=C5)S4)=O)=O)=O)[C@2](C)[C@H](C)CC3           | 6.37 |
| O=C(C(C1)[C@2](H)[C@@31][C@@H](C)[C@H](O)[C@](C)(C=C)C[C@@H](OC(CSC4=CC(NC(CNCCO)=O)CN=C4)=O)[C@2](C)[C@H](C)CC3                | 6.37 |
| O=C1CC[C@2](CC[C@H]3C)[C@1](H)[C@3](C)[C@H](OC(CN4CCN(C(CN5CCCCC5)=O)CC4)=O)C[C@@](C)(C=C)[C@@H](O)[C@@H]2C                     | 6.37 |
| O=C1CC[C@2](CC[C@H]3C)[C@1](H)[C@3](C)[C@H](OC(CSCC(NC4=CC=C(NCCO)C=C4)=O)=O)C[C@@](C)(C=C)[C@@H](O)[C@@H]2C                    | 6.37 |
| O=C(C(C1)[C@2](H)[C@@31][C@@H](C)[C@H](O)[C@](C)(C=C)C[C@@H](OC(CSC(C)(C)CNC(C4=CC=C(N)C=C4)=O)=O)[C@2](C)[C@H](C)CC3           | 6.37 |
| O=C(C(C1)[C@2](H)[C@@31][C@@H](C)[C@H](O)[C@](C)(C=C)C[C@@H](OC(CSC(C)(C)CNC(C4=C(C)C=CC=C4)=O)=O)[C@2](C)[C@H](C)CC3           | 6.37 |
| O=C(C(C1)[C@2](H)[C@@31][C@@H](C)[C@H](O)[C@](C)(C=C)C[C@@H](OC(CSC4=NN=C(C5=CC=CC(C)=C5[N+](O)=O)=O)[C@2](C)[C@H](C)CC3        | 6.37 |
| O=C(C(C1)[C@2](H)[C@@31][C@@H](C)[C@H](O)[C@](C)(C=C)C[C@@H](OC(CSC4=NN(C(C5=CC=CC(C)=C5)=O)(C(N)=N4)=O)[C@2](C)[C@H](C)CC3     | 6.37 |
| O=C(C(C1)[C@2](H)[C@@31][C@@H](C)[C@H](O)[C@](C)(C=C)C[C@@H](OC(CSC(C)(C)CNC(CN(C)CC)=O)=O)[C@2](C)[C@H](C)CC3                  | 6.36 |
| O=C(C(C1)[C@2](H)[C@@31][C@@H](C)[C@H](O)[C@](C)(C=C)C[C@@H](OC(CSCCNC(C4=CC=CC(CI)=C4)=O)=O)[C@2](C)[C@H](C)CC3                | 6.36 |
| O=C(C(C1)[C@2](H)[C@@31][C@@H](C)[C@H](O)[C@](C)(C=C)C[C@@H](OC(CSCCNC(C4=CC=C(CI)C=C4)=O)=O)[C@2](C)[C@H](C)CC3                | 6.36 |
| O=C(C(C1)[C@2](H)[C@@31][C@@H](C)[C@H](O)[C@](C)(C=C)C[C@@H](OC(CSC4=NN=C(C5=CC=CC(CI)=C5)O4)=O)[C@2](C)[C@H](C)CC3             | 6.36 |
| O=C(C(C1)[C@2](H)[C@@31][C@@H](C)[C@H](O)[C@](C)(C=C)C[C@@H](OC(CSC4=CC(NC(CN(CO)=O)C=CC(CO)C=C4)=O)[C@2](C)[C@H](C)CC3         | 6.36 |
| O=C(C(C1)[C@2](H)[C@@31][C@@H](C)[C@H](O)[C@](C)(C=C)C[C@@H](OC(CSC4=NN=C(C5=CC=CC(OC)C=C5)O4)=O)[C@2](C)[C@H](C)CC3            | 6.36 |
| O=C(C(C1)[C@2](H)[C@@31][C@@H](C)[C@H](O)[C@](C)(C=C)C[C@@H](OC(N(C(C4)C(C5=C4C=C(OC)C([N+](O)=O)=O)=O)[C@2](C)[C@H](C)CC3      | 6.36 |
| O=C1CC[C@2](CC[C@H]3C)[C@1](H)[C@3](C)[C@H](OC(CN4CCN(C5=CC=CC([N+](O)=O)=O)C5)CC4)=O)C[C@@](C)(C=C)[C@@H](O)[C@@H]2C           | 6.36 |
| O=C(C(C1)[C@2](H)[C@@31][C@@H](C)[C@H](O)[C@](C)(C=C)C[C@@H](OC(CSCCNC(C4=CC=CC(F)=C4)=O)=O)[C@2](C)[C@H](C)CC3                 | 6.35 |
| O=C(C(C1)[C@2](H)[C@@31][C@@H](C)[C@H](O)[C@](C)(C=C)C[C@@H](OC(CSC4=NC5(C(C=CC=C5)N4)=O)=O)[C@2](C)[C@H](C)CC3                 | 6.35 |
| O=C1CC[C@2](CC[C@H]3C)[C@1](H)[C@3](C)[C@H](OC(CSCC(NC4=CC=C(N)C=C4)=O)=O)C[C@@](C)(C=C)[C@@H](O)[C@@H]2C                       | 6.35 |
| O=C(C(C1)[C@2](H)[C@@31][C@@H](C)[C@H](O)[C@](C)(C=C)C[C@@H](OC(CSCCNC(C4=CC=CC(CO)=C4)=O)=O)[C@2](C)[C@H](C)CC3                | 6.35 |
| O=C(C(C1)[C@2](H)[C@@31][C@@H](C)[C@H](O)[C@](C)(C=C)C[C@@H](OC(CSC4=NN=C(C5=CC=CC=C5N)O4)=O)[C@2](C)[C@H](C)CC3                | 6.35 |
| O=C1CC[C@2](CC[C@H]3C)[C@1](H)[C@3](C)[C@H](OC(CSC4=NC(CO)C=CC(CO)C=C                                                           | 6.34 |
| O=C(C(C1)[C@2](H)[C@@31][C@@H](C)[C@H](O)[C@](C)(C=C)C[C@@H](OC(CN4CCN(C5=CC=CC(OC)=C5)CC4)=O)[C@2](C)[C@H](C)CC3               | 6.34 |
| O=C(C(C1)[C@2](H)[C@@31][C@@H](C)[C@H](O)[C@](C)(C=C)C[C@@H](OC(CN4CCN(C5=CC=C(CO)C=C5)CC4)=O)[C@2](C)[C@H](C)CC3               | 6.34 |
| O=C1CC[C@2](CC[C@H]3C)[C@1](H)[C@3](C)[C@H](OC(CN4CCN(C5=CC=CC(OC)=C5)CC4)=O)C[C@@](C)(C=C)[C@@H](O)[C@@H]2C                    | 6.34 |
| O=C1CC[C@2](CC[C@H]3C)[C@1](H)[C@3](C)[C@H](OC(CSC4=NC(N(C)C)=CC(C)=N4)=O)C[C@@](C)(C=C)[C@@H](O)[C@@H]2C                       | 6.34 |
| O=C(C(C1)[C@2](H)[C@@31][C@@H](C)[C@H](O)[C@](C)(C=C)C[C@@H](OC(CSC4=NN=C(C5=CC=CC(C)=C5)N4)=O)[C@2](C)[C@H](C)CC3              | 6.34 |
| O=C(C(C1)[C@2](H)[C@@31][C@@H](C)[C@H](O)[C@](C)(C=C)C[C@@H](OC(CSC4=NN=C(C5=CN=CC=N5)O4)=O)[C@2](C)[C@H](C)CC3                 | 6.33 |
| O=C(C(C1)[C@2](H)[C@@31][C@@H](C)[C@H](O)[C@](C)(C=C)C[C@@H](OC(CSC4=NN=C(C5=CC=CC=N5)O4)=O)[C@2](C)[C@H](C)CC3                 | 6.33 |
| O=C(C(C1)[C@2](H)[C@@31][C@@H](C)[C@H](O)[C@](C)(C=C)C[C@@H](OC(CN4CCN(C5=CC=CC(OC)=C4)=O)[C@2](C)[C@H](C)CC3                   | 6.33 |
| O=C1CC[C@2](CC[C@H]3C)[C@1](H)[C@3](C)[C@H](OC(CN4CCN(C5=CC=CC(OC)=C5)CC4)=O)C[C@@](C)(C=C)[C@@H](O)[C@@H]2C                    | 6.33 |
| O=C(C(C1)[C@2](H)[C@@31][C@@H](C)[C@H](O)[C@](C)(C=C)C[C@@H](OC(CSC4=NN=C(C5=CC=CC=C5)O4)=O)[C@2](C)[C@H](C)CC3                 | 6.33 |
| O=C1CC[C@2](CC[C@H]3C)[C@1](H)[C@3](C)[C@H](OC(CSC4=NC(OC)=CC(C)=N4)=O)C[C@@](C)(C=C)[C@@H](O)[C@@H]2C                          | 6.33 |
| O=C(C(C1)[C@2](H)[C@@31][C@@H](C)[C@H](O)[C@](C)(C=C)C[C@@H](OC(CN4CCN(C5=CC=CC(CI)=C5)CC4)=O)[C@2](C)[C@H](C)CC3               | 6.33 |
| O=C(C(C1)[C@2](H)[C@@31][C@@H](C)[C@H](O)[C@](C)(C=C)C[C@@H](OC(CN4N=NC(C5=CC=C(CO)C=C5)=C4)=O)[C@2](C)[C@H](C)CC3              | 6.33 |
| O=C(C(C1)[C@2](H)[C@@31][C@@H](C)[C@H](O)[C@](C)(C=C)C[C@@H](OC(CSC4=NC(C=CC=C5)=C5N4)=O)[C@2](C)[C@H](C)CC3                    | 6.33 |
| O=C(C(C1)[C@2](H)[C@@31][C@@H](C)[C@H](O)[C@](C)(C=C)C[C@@H](OC(CNC45CC(C(CO)C)CC(C)C4)=O)[C@2](C)[C@H](C)CC3                   | 6.32 |
| O=C(C(C1)[C@2](H)[C@@31][C@@H](C)[C@H](O)[C@](C)(C=C)C[C@@H](OC(CSC4=NC(C=CC=C5)=C5S4)=O)[C@2](C)[C@H](C)CC3                    | 6.32 |
| O=C(C(C1)[C@2](H)[C@@31][C@@H](C)[C@H](O)[C@](C)(C=C)C[C@@H](OC(CSC4=NC(C=CC=C5)=C5S4)=O)[C@2](C)[C@H](C)CC3                    | 6.32 |
| O=C(C(C1)[C@2](H)[C@@31][C@@H](C)[C@H](O)[C@](C)(C=C)C[C@@H](OC(CS(SC4=NN=CS4)=O)=O)[C@2](C)[C@H](C)CC3                         | 6.32 |
| O=C(C(C1)[C@2](H)[C@@31][C@@H](C)[C@H](O)[C@](C)(C=C)C[C@@H](OC(CSC4=NC(C=CC=C5)=C5N4)=O)[C@2](C)[C@H](C)CC3                    | 6.31 |
| O=C(C(C1)[C@2](H)[C@@31][C@@H](C)[C@H](O)[C@](C)(C=C)C[C@@H](OC(CSC4=NC(C=CC=C5)=C5N4)=O)[C@2](C)[C@H](C)CC3                    | 6.31 |
| O=C(C(C1)[C@2](H)[C@@31][C@@H](C)[C@H](O)[C@](C)(C=C)C[C@@H](OC(CSCC4=CSC(N)=N4)=O)[C@2](C)[C@H](C)CC3                          | 6.31 |
| O=C(C(C1)[C@2](H)[C@@31][C@@H](C)[C@H](O)[C@](C)(C=C)C[C@@H](OC(CSCC4=CSC(N)=N4)=O)[C@2](C)[C@H](C)CC3                          | 6.31 |
| O=C1CC[C@2](CC[C@H]3C)[C@1](H)[C@3](C)[C@H](OC(CSC4=NC(O)=CC(N)=N4)=O)C[C@@](C)(C=C)[C@@H](O)[C@@H]2C                           | 6.30 |
| O=C1CC[C@2](CC[C@H]3C)[C@1](H)[C@3](C)[C@H](OC(CSC4=NC(C)=CC(C)=N4)=O)C[C@@](C)(C=C)[C@@H](O)[C@@H]2C                           | 6.30 |
| O=C(C(C1)[C@2](H)[C@@31][C@@H](C)[C@H](O)[C@](C)(C=C)C[C@@H](OC(CSC4=NC(C)C)[C@H](O4)CNC4=O)=O)[C@2](C)[C@H](C)CC3              | 6.30 |
| O=C(C(C1)[C@2](H)[C@@31][C@@H](C)[C@H](O)[C@](C)(C=C)C[C@@H](OC(CSC(C)[C@H](O4)CNC4=O)=O)[C@2](C)[C@H](C)CC3                    | 6.30 |



|                                                                                                                                                                    |      |
|--------------------------------------------------------------------------------------------------------------------------------------------------------------------|------|
| O=C(CC1)[C@]2([H])[C@@]31[C@@H](C)[C@H](O)[C@](C)(C=C)C[C@@H](OC(N(CC4)C(C5=C4C=CC=C5)=O)=O)[C@]2(C)[C@H](C)CC3                                                    | 6.30 |
| O=C(CC1)[C@]2([H])[C@@]31[C@@H](C)[C@H](O)[C@](C)(C=C)C[C@@H](OC(CNCCC4=CC=C54)=O)[C@]2(C)[C@H](C)CC3                                                              | 6.29 |
| O=C(CC1)[C@]2([H])[C@@]31[C@@H](C)[C@H](O)[C@](C)(C=C)C[C@@H](OC(CSCC4=C(O)C(C=C(CO)O4)=O)=O)[C@]2(C)[C@H](C)CC3                                                   | 6.29 |
| O=C(CC1)[C@]2([H])[C@@]31[C@@H](C)[C@H](O)[C@](C)(C=C)C[C@@H](OC(C[N+](4=CC=C(N(C)C)C=C4)=O)[C@]2(C)[C@H](C)CC3                                                    | 6.29 |
| O=C(CC1)[C@]2([H])[C@@]31[C@@H](C)[C@H](O)[C@](C)(C=C)C[C@@H](OC(CN4CCCC(CO)C4)=O)[C@]2(C)[C@H](C)CC3                                                              | 6.28 |
| O=C(CC1)[C@]2([H])[C@@]31[C@@H](C)[C@H](O)[C@](C)(C=C)C[C@@H](OC(CSC4=NN=CC=C4)=O)[C@]2(C)[C@H](C)CC3                                                              | 6.28 |
| O=C(CC1)[C@]2([H])[C@@]31[C@@H](C)[C@H](O)[C@](C)(C=C)C[C@@H](OC(CSC4CCN(C(CCN5C=NC6=C5N=C(N)N=C6N7CCCC7)=O)CC4)=O)[C@]2(C)[C@]2(C)[C@H](C)CC3                     | 6.28 |
| O=C(CC1)[C@]2([H])[C@@]31[C@@H](C)[C@H](O)[C@](C)(C=C)C[C@@H](OC(CSC4=C(NC(CN5N=NC(CN6CCN(C7=CC=CC=C7[N+](O-)=O)CC6)=C5)=O)C=CC=C4)=O)[C@]2(C)[C@H](C)CC3          | 6.21 |
| O=C(CC1)[C@]2([H])[C@@]31[C@@H](C)[C@H](O)[C@](C)(C=C)C[C@@H](OC(C[N+](4(CCC(O)C4)=O)[C@]2(C)[C@H](C)CC3                                                           | 6.27 |
| O=C(CC1)[C@]2([H])[C@@]31[C@@H](C)[C@H](O)[C@](C)(C=C)C[C@@H](OC(CSCC4=CC(C(O)=C(CN(C)C)O4)=O)=O)[C@]2(C)[C@H](C)CC3                                               | 6.27 |
| O=C(CC1)[C@]2([H])[C@@]31[C@@H](C)[C@H](O)[C@](C)(C=C)C[C@@H](OC(CSC4=C(NC(CN5N=NC(CN6CCN(C7=CC=C(CI)C=C7)CC6)=C5)=O)C=CC=C4)=O)[C@]2(C)[C@H](C)CC3                | 6.21 |
| O=C(CC1)[C@]2([H])[C@@]31[C@@H](C)[C@H](O)[C@](C)(C=C)C[C@@H](OC(CSC4=C(NC(CN5N=NC(CN6CCN(C7=CC=CC=C7OC)CC6)=C5)=O)C=CC=C4)=O)[C@]2(C)[C@H](C)CC3                  | 6.20 |
| O=C(CC1)[C@]2([H])[C@@]31[C@@H](C)[C@H](O)[C@](C)(C=C)C[C@@H](OC(CN4CCC(O)C4)=O)[C@]2(C)[C@H](C)CC3                                                                | 6.25 |
| O=C(CC1)[C@]2([H])[C@@]31[C@@H](C)[C@H](O)[C@](C)(C=C)C[C@@H](OC(C[N+](4(CCCC4)C=O)[C@]2(C)[C@H](C)CC3                                                             | 6.25 |
| O=C(CC1)[C@]2([H])[C@@]31[C@@H](C)[C@H](O)[C@](C)(C=C)C[C@@H](OC(CSC4=C(NC(CN5N=NC(CN6CCN(C7=CC=CC=C7O)CC6)=C5)=O)C=CC=C4)=O)[C@]2(C)[C@H](C)CC3                   | 6.20 |
| O=C(CC1)[C@]2([H])[C@@]31[C@@H](C)[C@H](O)[C@](C)(C=C)C[C@@H](OC(CSC4CCN(C(CCN5C=NC6=C5N=CN=C6N7CC(CNC)CC7)=O)CC4)=O)[C@]2(C)[C@H](C)CC3                           | 6.19 |
| O=C(CC1)[C@]2([H])[C@@]31[C@@H](C)[C@H](O)[C@](C)(C=C)C[C@@H](OC(CSC4=C(NC(CN5N=NC(CN6CCN(C7=CC=CC=C7)CC6)=C5)=O)C=CC=C4)=O)[C@]2(C)[C@H](C)CC3                    | 6.19 |
| O=C(CC1)[C@]2([H])[C@@]31[C@@H](C)[C@H](O)[C@](C)(C)C[C@@H](OC(COC(CC4)CCN4C(CCN5C=NC6=C5N=CN=C6N7CCC(C7)N)=O)=O)[C@]2(C)[C@H](C)CC3                               | 6.19 |
| O=C(CC1)[C@]2([H])[C@@]31[C@@H](C)[C@H](O)[C@](C)(C=C)C[C@@H](OC(CS[C@H]4CC[C@H](C(OCC)=O)C[C@H]4NS(=O)(C5=CC=C(NC(C)=O)C=C5)=O)=O)[C@]2(C)[C@H](C)CC3             | 6.18 |
| O=C(CC1)[C@]2([H])[C@@]31[C@@H](C)[C@H](O)[C@](C)(C=C)C[C@@H](OC(CSC4CCN(C(CCN5C=NC6=C5N=C(N)N=C6N7CCNCC7)=O)CC4)=O)[C@]2(C)[C@H](C)CC3                            | 6.18 |
| O=C(CC1)[C@]2([H])[C@@]31[C@@H](C)[C@H](O)[C@](C)(C=C)C[C@@H](OC(CSC4CCN(C(CCN5C=NC6=C5N=CN=C6N7CC(CN)CC7)=O)CC4)=O)[C@]2(C)[C@H](C)CC3                            | 6.18 |
| O=C(CC1)[C@]2([H])[C@@]31[C@@H](C)[C@H](O)[C@](C)(C=C)C[C@@H](OC(CSC4CCN(C(CCN5C=NC6=C5N=CN=C6N7CCC(C7)N)=O)C4)=O)[C@]2(C)[C@H](C)CC3                              | 6.17 |
| O=C(CC1)[C@]2([H])[C@@]31[C@@H](C)[C@H](O)[C@](C)(C=C)C[C@@H](OC(CS[C@H]4CC[C@H](C(OCC)=O)C[C@H]4NS(=O)(C5=CC=C(CI)C=C5)=O)=O)[C@]2(C)[C@H](C)CC3                  | 6.17 |
| O=C(CC1)[C@]2([H])[C@@]31[C@@H](C)[C@H](O)[C@](C)(C=C)C[C@@H](OC(CSCC(C4)CN4C(CCN5C=NC6=C5N=C(N)N=C6N7CCNCC7)=O)=O)[C@]2(C)[C@H](C)CC3                             | 6.17 |
| O=C(CC1)[C@]2([H])[C@@]31[C@@H](C)[C@H](O)[C@](C)(C=C)C[C@@H](OC(CSC4CCCN(C(CCN5C=NC6=C5N=CN=C6N7CCC(C7)N)=O)C4)=O)[C@]2(C)[C@H](C)CC3                             | 6.17 |
| O=C(CC1)[C@]2([H])[C@@]31[C@@H](C)[C@H](O)[C@](C)(C=C)C[C@@H](OC(CSC4CCN(C(CCN5C=NC6=C5N=CN=C6N7C[C@@H](N)CC7)=O)CC4)=O)[C@]2(C)[C@H](C)CC3                        | 6.17 |
| O=C(CC1)[C@]2([H])[C@@]31[C@@H](C)[C@H](O)[C@](C)(C=C)C[C@@H](OC(CSC4=C(NC(CN5N=NC(CN6CCC(CCO)CC6)=C5)=O)C=CC=C4)=O)[C@]2(C)[C@H](C)CC3                            | 6.17 |
| O=C(CC1)[C@]2([H])[C@@]31[C@@H](C)[C@H](O)[C@](C)(C=C)C[C@@H](OC(CN4N=NC(C5=CC=CC(CN6C7=NC=NC(N8CCN(C)CC8)=C7N=C6)=C5)=C4)=O)[C@]2(C)[C@H](C)CC3                   | 6.17 |
| O=C(CC1)[C@]2([H])[C@@]31[C@@H](C)[C@H](O)[C@](C)(C=C)C[C@@H](OC(CSC4=NC(NC(C5)=C5C(NC(CN6CCC(N7CCCCC7)CC6)=O)=N4)=O)C[C@@](C)(C=C)[C@@H](O)[C@]2(C)[C@H](C)CC3    | 6.17 |
| O=C(CC1)[C@]2([H])[C@@]31[C@@H](C)[C@H](O)[C@](C)(C=C)C[C@@H](OC(CSC4=NC(NC(C5)=C5C(NC(CN6CCN(C7=CC=CC=C7)CC6)=O)=N4)=O)C[C@@](C)(C=C)[C@@H](O)[C@]2(C)[C@H](C)CC3 | 6.16 |
| O=C(CC1)[C@]2([H])[C@@]31[C@@H](C)[C@H](O)[C@](C)(C=C)C[C@@H](OC(CN4N=NC(C5=CC=CC=C5CN6C7=NC(N)=NC(N(C)CC)=C7N=C6)=C4)=O)[C@]2(C)[C@H](C)CC3                       | 6.16 |
| O=C(CC1)[C@]2([H])[C@@]31[C@@H](C)[C@H](O)[C@](C)(C=C)C[C@@H](OC(CN4N=NC(C5=CC=CC(CN6C7=NC(N)=NC(N(C)CC)=C7N=C6)=C5)=C4)=O)[C@]2(C)[C@H](C)CC3                     | 6.16 |
| O=C(CC1)[C@]2([H])[C@@]31[C@@H](C)[C@H](O)[C@](C)(C=C)C[C@@H](OC(CSC4=C(NC(CN5N=NC(CN6CCCC(CO)C6)=C5)=O)C=CC=C4)=O)[C@]2(C)[C@H](C)CC3                             | 6.16 |
| O=C(CC1)[C@]2([H])[C@@]31[C@@H](C)[C@H](O)[C@](C)(C=C)C[C@@H](OC(CSCCN)=O)[C@]2(C)[C@H](C)CC3                                                                      | 6.24 |
| O=C(CC1)[C@]2([H])[C@@]31[C@@H](C)[C@H](O)[C@](C)(C=C)C[C@@H](OC(CSC4CCN(C(CCN5C=NC6=C5N=CN=C6N)=O)CC4)=O)[C@]2(C)[C@H](C)CC3                                      | 6.23 |
| O=C(CC1)[C@]2([H])[C@@]31[C@@H](C)[C@H](O)[C@](C)(C=C)C[C@@H](OC(CSCCN(C(CCN4C=NC5=C4N=CN=C5N6CCC(N)C6)=O)C=O)[C@]2(C)[C@H](C)CC3                                  | 6.15 |
| O=C(CC1)[C@]2([H])[C@@]31[C@@H](C)[C@H](O)[C@](C)(C=C)C[C@@H](OC(CS[C@H]4CC[C@H](C(OCC)=O)C[C@H]4NS(=O)(C5=CC=CC=C5)=O)[C@]2(C)[C@H](C)CC3                         | 6.15 |
| O=C(CC1)[C@]2([H])[C@@]31[C@@H](C)[C@H](O)[C@](C)(C=C)C[C@@H](OC(CN4CCN(C5=CC=C(C/C=C/C6=CC=C([N+](O-)=O)C=C6)=O)C=C5)CC4)=O)[C@]2(C)[C@H](C)CC3                   | 6.14 |
| O=C(CC1)[C@]2([H])[C@@]31[C@@H](C)[C@H](O)[C@](C)(C=C)C[C@@H](OC(CN4N=NC(C5=CC=C(CN6C7=NC=NC(NCCN)=C7N=C6)C=C5)=C4)=O)[C@]2(C)[C@H](C)CC3                          | 6.14 |
| O=C(CC1)[C@]2([H])[C@@]31[C@@H](C)[C@H](O)[C@](C)(C=C)C[C@@H](OC(CN4N=NC(C5=CC=C(CN6C7=NC=NC(NC(N)=N)=C7N=C6)C=C5)=C4)=O)[C@]2(C)[C@H](C)CC3                       | 6.14 |
| O=C(CC1)[C@]2([H])[C@@]31[C@@H](C)[C@H](O)[C@](C)(C=C)C[C@@H](OC(CSC4=C(NC(CN5N=NC(CN6CCOCC6)=C5)=O)C=CC=C4)=O)[C@]2(C)[C@H](C)CC3                                 | 6.14 |
| O=C(CC1)[C@]2([H])[C@@]31[C@@H](C)[C@H](O)[C@](C)(C=C)C[C@@H](OC(C[N+](C)(C)C=O)[C@]2(C)[C@H](C)CC3                                                                | 6.23 |

|                                                                                                                                                    |      |
|----------------------------------------------------------------------------------------------------------------------------------------------------|------|
| O=C(CC1)[C@2]([H])[C@@]31[C@@H](C)[C@H](O)[C@](C)(C=C)C[C@@H](OC(CSC4=C(NC(CN5N=NC(CN6CCCC6)=C5)=O)C=CC=C4)=O)[C@]2(C)[C@H](C)CC3                  | 6.14 |
| O=C(CC1)[C@2]([H])[C@@]31[C@@H](C)[C@H](O)[C@](C)(C=C)C[C@@H](OC(CSC4=CC(C=NO)=CN=C4)=O)[C@]2(C)[C@H](C)CC3                                        | 6.22 |
| O=C(CC1)[C@2]([H])[C@@]31[C@@H](C)[C@H](O)[C@](C)(C=C)C[C@@H](OC(CN(C)C)=O)[C@]2(C)[C@H](C)CC3                                                     | 6.21 |
| O=C(CC1)[C@2]([H])[C@@]31[C@@H](C)[C@H](O)[C@](C)(C=C)C[C@@H](OC(CN4CCN(C(CN5CCN(C6=CC=CC=C6)CC5)=O)CC4)=O)[C@]2(C)[C@H](C)CC3                     | 6.14 |
| CC1C23C(C(CC3)=O)C(C(CC(C=C)(C)C1O)OC(CN4CCN(C(CN5CCN(C6=C(Cl)C=CC=C6)CC5)=O)CC4)=O)(C(CC2)C)C                                                     | 6.14 |
| O=C(CC1)[C@2]([H])[C@@]31[C@@H](C)[C@H](O)[C@](C)(C=C)C[C@@H](OC(CN4CCN(C(C=C/C5=C(OC)C=CC=C5)=O)CC4)=O)[C@]2(C)[C@H](C)CC3                        | 6.21 |
| O=C(CC1)[C@2]([H])[C@@]31[C@@H](C)[C@H](O)[C@](C)(C=C)C[C@@H](OC(CSCC4=CSC(NC(C5=CC=C(Cl)C=C5Cl)=O=N4)=O)[C@]2(C)[C@H](C)CC3                       | 6.13 |
| O=C(CC1)[C@2]([H])[C@@]31[C@@H](C)[C@H](O)[C@](C)(C=C)C[C@@H](OC(CN4CCN(C(CN5CCN(C6=CC=C(OC)C=C6)CC5)=O)CC4)=O)[C@]2(C)[C@H](C)CC3                 | 6.13 |
| CC1C23C(C(CC3)=O)C(C(CC(C=C)(C)C1O)OC(CN4CCN(C(CN5CCN(C6=C(OC)C=CC=C6)CC5)=O)CC4)=O)(C(CC2)C)C                                                     | 6.13 |
| CC1C23C(C(CC3)=O)C(C(CC(C=C)(C)C1O)OC(CN4CCN(C(CN5CCN(C6=CC=C(OC)C=C6)CC5)=O)CC4)=O)(C(CC2)C)C                                                     | 6.13 |
| O=C(CC1)[C@2]([H])[C@@]31[C@@H](C)[C@H](O)[C@](C)(C=C)C[C@@H](OC(CN4CCN(C(CN5CCN(C6=CC=C(C(C/C=C/C6=CC=C(N)C=C6)=O)C=C5)CC4)=O)[C@]2(C)[C@H](C)CC3 | 6.13 |
| O=C(CC1)[C@2]([H])[C@@]31[C@@H](C)[C@H](O)[C@](C)(C=C)C[C@@H](OC(CN4CCN(C5=CC=C(C(C/C=C/C6=CC=C(N)C=C6)=O)C=C5)CC4)=O)[C@]2(C)[C@H](C)CC3          | 6.13 |
| O=C(CC1)[C@2]([H])[C@@]31[C@@H](C)[C@H](O)[C@](C)(C=C)C[C@@H](OC(N4CC5=C(C=CC=C5OCCN6C=NC(C7=CC=CN=C7)=C6)C4=O)=O)[C@]2(C)[C@H](C)CC3              | 6.13 |
| CC1C23C(C(CC3)=O)C(C(CC(C=C)(C)C1O)OC(CN4CCN(C(CN5CCN(C6=CC(O)=CC=C6)CC5)=O)CC4)=O)(C(CC2)C)C                                                      | 6.12 |
| O=C(CC1)[C@2]([H])[C@@]31[C@@H](C)[C@H](O)[C@](C)(C=C)C[C@@H](OC(N4C(C(C=C(NC(CN5CCN(CCO)CC5)=O)C=C6)=C6C4)=O)=O)[C@]2(C)[C@H](C)CC3               | 6.12 |
| O=C(CC1)[C@2]([H])[C@@]31[C@@H](C)[C@H](O)[C@](C)(C=C)C[C@@H](OC(CSC4=NN=C(C)N4/N=C/C5=CC=C(N6CCOCC6)C=C5)=O)[C@]2(C)[C@H](C)CC3                   | 6.12 |
| O=C(CC1)[C@2]([H])[C@@]31[C@@H](C)[C@H](O)[C@](C)(C=C)C[C@@H](OC(CN4CCN(C(CN5CCN(C6=CC=CC=C6)CC5)=O)CC4)=O)[C@]2(C)[C@H](C)CC3                     | 6.12 |
| O=C(CC1)[C@2]([H])[C@@]31[C@@H](C)[C@H](O)[C@](C)(C=C)C[C@@H](OC(CN4CCN(C(CN5CCN(C6=CC=CC(C)C=C6)CC5)=O)CC4)=O)[C@]2(C)[C@H](C)CC3                 | 6.12 |
| CC1C23C(C(CC3)=O)C(C(CC(C=C)(C)C1O)OC(CN4CCN(C(CN5CCN(C6=CC(C)=CC=C6)CC5)=O)CC4)=O)(C(CC2)C)C                                                      | 6.12 |
| O=C(CC1)[C@2]([H])[C@@]31[C@@H](C)[C@H](O)[C@](C)(C=C)C[C@@H](OC(CN4CCN(C(C=C/C5=CC=CC=C5F)=O)CC4)=O)[C@]2(C)[C@H](C)CC3                           | 6.20 |
| O=C(CC1)[C@2]([H])[C@@]31[C@@H](C)[C@H](O)[C@](C)(C=C)C[C@@H](OC(CSCC4=CSC(NC([C@@]([H])(N)CC5=CC=CC=C5)=O=N4)=O)[C@]2(C)[C@H](C)CC3               | 6.12 |
| O=C(CC1)[C@2]([H])[C@@]31[C@@H](C)[C@H](O)[C@](C)(C=C)C[C@@H](OC(CN4CCN(C(C=C/C5=CC=C(F)C=C5)=O)CC4)=O)[C@]2(C)[C@H](C)CC3                         | 6.20 |
| O=C(CC1)[C@2]([H])[C@@]31[C@@H](C)[C@H](O)[C@](C)(C=C)C[C@@H](OC(CN4N=NC(C5=CC=CC=C5CN6C7=NC=NC(N)=C7N=C6)=C4)=O)[C@]2(C)[C@H](C)CC3               | 6.12 |
| O=C(CC1)[C@2]([H])[C@@]31[C@@H](C)[C@H](O)[C@](C)(C=C)C[C@@H](OC(N(C(C4)C(C5=C4C=C(OCCCCN6CCOCC6)C=C5)=O)=O)[C@]2(C)[C@H](C)CC3                    | 6.11 |
| O=C(CC1)[C@2]([H])[C@@]31[C@@H](C)[C@H](O)[C@](C)(C=C)C[C@@H](OC(N(C(C4)C(C5=C4C=C(OCCCN6CCN(C)CC6)C=C5)=O)=O)[C@]2(C)[C@H](C)CC3                  | 6.11 |
| O=C(CC1)[C@2]([H])[C@@]31[C@@H](C)[C@H](O)[C@](C)(C=C)C[C@@H](OC(CN4CCN(C(CN5CCN(C6=CC=CC=C6)CC5)=O)CC4)=O)[C@]2(C)[C@H](C)CC3                     | 6.11 |
| O=C(CC1)[C@2]([H])[C@@]31[C@@H](C)[C@H](O)[C@](C)(C=C)C[C@@H](OC(N4C(C(C=C(NC(CCN5CCN(C)CC5)=O)C=C6)=C6C4)=O)=O)[C@]2(C)[C@H](C)CC3                | 6.11 |
| O=C(CC1)[C@2]([H])[C@@]31[C@@H](C)[C@H](O)[C@](C)(C=C)C[C@@H](OC(CN4N=NC(CN5CCN(C6=CC=C([N+][O-])=O)C=C6)CC5)=C4)=O)[C@]2(C)[C@H](C)CC3            | 6.11 |
| O=C(CC1)[C@2]([H])[C@@]31[C@@H](C)[C@H](O)[C@](C)(C=C)C[C@@H](OC(CSCC4=CSC(NC(CN(CCC)CCC)=O=N4)=O)[C@]2(C)[C@H](C)CC3                              | 6.11 |
| O=C(CC1)[C@2]([H])[C@@]31[C@@H](C)[C@H](O)[C@](C)(C=C)C[C@@H](OC(CN4CCN(C(NCC5=CC=C(C(F)F)C=C5)=O)CC4)=O)[C@]2(C)[C@H](C)CC3                       | 6.11 |
| O=C(CC1)[C@2]([H])[C@@]31[C@@H](C)[C@H](O)[C@](C)(C=C)C[C@@H](OC(CSCC4=CSC(NC(CN5CCN(C)CC5)=O=N4)=O)[C@]2(C)[C@H](C)CC3                            | 6.11 |
| O=C(CC1)[C@2]([H])[C@@]31[C@@H](C)[C@H](O)[C@](C)(C=C)C[C@@H](OC(CSCC4=CSC(NC(CN5CCN(C)CC5)=O=N4)=O)[C@]2(C)[C@H](C)CC3                            | 6.11 |
| O=C(CC1)[C@2]([H])[C@@]31[C@@H](C)[C@H](O)[C@](C)(C=C)C[C@@H](OC(CSC4=NC(N5CCC(CO)CC5)=CC(C)=N4)=O)[C@]2(C)[C@H](C)CC3                             | 6.15 |
| O=C(CC1)[C@2]([H])[C@@]31[C@@H](C)[C@H](O)[C@](C)(C=C)C[C@@H](OC(CN4N=NC(C5=CC=C(N6C=N7=C6N=CN=C7N)C=C5)=C4)=O)[C@]2(C)[C@H](C)CC3                 | 6.11 |
| O=C(CC1)[C@2]([H])[C@@]31[C@@H](C)[C@H](O)[C@](C)(C=C)C[C@@H](OC(CN4N=NC(C5=CC=C(N6C7=NC=NC(N)=C7N=C6)C=C5)=C4)=O)[C@]2(C)[C@H](C)CC3              | 6.11 |
| O=C(CC1)[C@2]([H])[C@@]31[C@@H](C)[C@H](O)[C@](C)(C=C)C[C@@H](OC(N(C(C4)C(C5=C4C=C(OCCCN6CCOCC6)C=C5)=O)=O)[C@]2(C)[C@H](C)CC3                     | 6.11 |
| O=C(CC1)[C@2]([H])[C@@]31[C@@H](C)[C@H](O)[C@](C)(C=C)C[C@@H](OC(N(C(C4)C(C5=C4C=C(OCCN6CCN(C)CC6)C=C5)=O)=O)[C@]2(C)[C@H](C)CC3                   | 6.10 |
| O=C(CC1)[C@2]([H])[C@@]31[C@@H](C)[C@H](O)[C@](C)(C=C)C[C@@H](OC(N4C(C(C=C(NC(CCN5CCN(C)CC5)=O)C=C6)=C6C4)=O)=O)[C@]2(C)[C@H](C)CC3                | 6.10 |
| O=C(CC1)[C@2]([H])[C@@]31[C@@H](C)[C@H](O)[C@](C)(C=C)C[C@@H](OC(N4C(C(C=C(NC(CN5CCN(C)CC5)=O)C=C6)=C6C4)=O)=O)[C@]2(C)[C@H](C)CC3                 | 6.10 |
| O=C(CC1)[C@2]([H])[C@@]31[C@@H](C)[C@H](O)[C@](C)(C=C)C[C@@H](OC(CSCC4=CSC(NC(CN5CCOCC5)=O=N4)=O)[C@]2(C)[C@H](C)CC3                               | 6.10 |
| O=C(CC1)[C@2]([H])[C@@]31[C@@H](C)[C@H](O)[C@](C)(C=C)C[C@@H](OC(CSCC4=CSC(NC(CN5CCCCC5)=O=N4)=O)[C@]2(C)[C@H](C)CC3                               | 6.10 |
| O=C(CC1)[C@2]([H])[C@@]31[C@@H](C)[C@H](O)[C@](C)(C=C)C[C@@H](OC(CSCC4=CSC(NC(C5=CC=CC=C5O)=O=N4)=O)[C@]2(C)[C@H](C)CC3                            | 6.10 |
| O=C(CC1)[C@2]([H])[C@@]31[C@@H](C)[C@H](O)[C@](C)(C=C)C[C@@H](OC(CSC4=C(NC(CN5CCN(C)CC5)=O)C=CC=C4)=O)[C@]2(C)[C@H](C)CC3                          | 6.10 |
| O=C(CC1)[C@2]([H])[C@@]31[C@@H](C)[C@H](O)[C@](C)(C=C)C[C@@H](OC(CSC4=NN=C(NC([C@H](C)C5=CC=CC=C5)=O)S4)=O)[C@]2(C)[C@H](C)CC3                     | 6.10 |
| O=C(CC1)[C@2]([H])[C@@]31[C@@H](C)[C@H](O)[C@](C)(C=C)C[C@@H](OC(CN4CCN(C(NCC5=CC=C([N+][O-])=O)C=C5)=O)CC4)=O)[C@]2(C)[C@H](C)CC3                 | 6.10 |
| O=C(CC1)[C@2]([H])[C@@]31[C@@H](C)[C@H](O)[C@](C)(C=C)C[C@@H](OC(CSC4=C(NC(C5=C(Cl)C=CC=C5)=O)C=CC=C4)=O)[C@]2(C)[C@H](C)CC3                       | 6.10 |
| O=C(CC1)[C@2]([H])[C@@]31[C@@H](C)[C@H](O)[C@](C)(C=C)C[C@@H](OC(CSC4=C(NC(C5=CC=C(Cl)C=C5)=O)C=CC=C4)=O)[C@]2(C)[C@H](C)CC3                       | 6.10 |
| O=C(CC1)[C@2]([H])[C@@]31[C@@H](C)[C@H](O)[C@](C)(C=C)C[C@@H](OC(N(C(C4)C(C5=C4C=C(OCCN6CCOCC6)C=C5)=O)=O)[C@]2(C)[C@H](C)CC3                      | 6.09 |
| O=C(CC1)[C@2]([H])[C@@]31[C@@H](C)[C@H](O)[C@](C)(C=C)C[C@@H](OC(CSC4=NN=C(C)N4/N=C/C5=CC=C(N(C)C)C=C5)=O)[C@]2(C)[C@H](C)CC3                      | 6.09 |
| O=C(CC1)[C@2]([H])[C@@]31[C@@H](C)[C@H](O)[C@](C)(C=C)C[C@@H](OC(N4C(C(C=C(NC(CN5CCOCC5)=O)C=C6)=C6C4)=O)=O)[C@]2(C)[C@H](C)CC3                    | 6.09 |
| O=C(CC1)[C@2]([H])[C@@]31[C@@H](C)[C@H](O)[C@](C)(C=C)C[C@@H](OC(N(C(C4)C(C5=C4C=C(OCCN6CCCC6)C=C5)=O)=O)[C@]2(C)[C@H](C)CC3                       | 6.09 |
| O=C(CC1)[C@2]([H])[C@@]31[C@@H](C)[C@H](O)[C@](C)(C=C)C[C@@H](OC(CSCC4=CSC(NC(CN(CO)CO)=O=N4)=O)[C@]2(C)[C@H](C)CC3                                | 6.09 |
| O=C(CC1)[C@2]([H])[C@@]31[C@@H](C)[C@H](O)[C@](C)(C=C)C[C@@H](OC(CSCC4=CC(C(OC)=CO4)=O)=O)[C@]2(C)[C@H](C)CC3                                      | 6.15 |

|                                                                                                                                             |      |
|---------------------------------------------------------------------------------------------------------------------------------------------|------|
| O=C1CC[C@]2(CC[C@H]3C)[C@]1([H])[C@]3(C)[C@H](OC(CSC4=NC(N)=CC(NC(CN(CC)CC)=O)=N4)=O)C[C@@](C)(C=C)[C@@H](O)[C@@H]2C                        | 6.09 |
| O=C(CC1)[C@]2([H])[C@@]31[C@@H](C)[C@H](O)[C@](C)(C=C)C[C@@H](OC(CSC4=NC(NC(CN(CC)CC)=O)=CC(N)=N4)=O)[C@]2(C)[C@H](C)CC3                    | 6.09 |
| O=C(CC1)[C@]2([H])[C@@]31[C@@H](C)[C@H](O)[C@](C)(C=C)C[C@@H](OC(CSC4=NN(C(C5=CC=CC=C5Cl)=O)C(N)=N4)=O)[C@]2(C)[C@H](C)CC3                  | 6.09 |
| O=C(CC1)[C@]2([H])[C@@]31[C@@H](C)[C@H](O)[C@](C)(C=C)C[C@@H](OC(CSC4=NN(C(C5=CC=C(Cl)C=C5)=O)C(N)=N4)=O)[C@]2(C)[C@H](C)CC3                | 6.09 |
| O=C1CC[C@]2(CC[C@H]3C)[C@]1([H])[C@]3(C)[C@H](OC(CSC4=NC(N)=CC(NC(CN5CCCC5)=O)=N4)=O)C[C@@](C)(C=C)[C@@H](O)[C@@H]2C                        | 6.09 |
| O=C(CC1)[C@]2([H])[C@@]31[C@@H](C)[C@H](O)[C@](C)(C=C)C[C@@H](OC(CSC4=NC(NC(CN5CCCC5)=O)=CC(N)=N4)=O)[C@]2(C)[C@H](C)CC3                    | 6.09 |
| O=C(CC1)[C@]2([H])[C@@]31[C@@H](C)[C@H](O)[C@](C)(C=C)C[C@@H](OC(CSC4=NN=C(C)N4/N=C/C5=CC=C(Cl)C=C5)=O)[C@]2(C)[C@H](C)CC3                  | 6.09 |
| O=C1CC[C@]2(CC[C@H]3C)[C@]1([H])[C@]3(C)[C@H](OC(CSCC(NC4=CC=C(NCCCC)C=C4C)=O)=O)C[C@@](C)(C=C)[C@@H](O)[C@@H]2C                            | 6.09 |
| O=C(CC1)[C@]2([H])[C@@]31[C@@H](C)[C@H](O)[C@](C)(C=C)C[C@@H](OC(CN4CCN(C(NC5=CC=C([N+])([O-])=O)C=C5)=O)CC4=O)[C@]2(C)[C@H](C)CC3          | 6.09 |
| O=C(CC1)[C@]2([H])[C@@]31[C@@H](C)[C@H](O)[C@](C)(C=C)C[C@@H](OC(CS(SC4=NC5=C(C=CC(Cl)=C5)S4)=O)=O)[C@]2(C)[C@H](C)CC3                      | 6.09 |
| O=C(CC1)[C@]2([H])[C@@]31[C@@H](C)[C@H](O)[C@](C)(C=C)C[C@@H](OC(CN4CCN(C(NCC5=CC=C(OC)C=C5)=O)CC4)=O)[C@]2(C)[C@H](C)CC3                   | 6.09 |
| O=C(CC1)[C@]2([H])[C@@]31[C@@H](C)[C@H](O)[C@](C)(C=C)C[C@@H](OC(CSC4=C(NC(C5=C(F)C=CC=C5)=O)C=CC=C4)=O)[C@]2(C)[C@H](C)CC3                 | 6.08 |
| O=C(CC1)[C@]2([H])[C@@]31[C@@H](C)[C@H](O)[C@](C)(C=C)C[C@@H](OC(CSC4=NN=C(C5=CC=C(C(F)F)F)C=C5)N4)=O)[C@]2(C)[C@H](C)CC3                   | 6.08 |
| O=C(CC1)[C@]2([H])[C@@]31[C@@H](C)[C@H](O)[C@](C)(C=C)C[C@@H](OC(CSC4=NN=C(NC(N5CCCCC5)=O)S4)=O)[C@]2(C)[C@H](C)CC3                         | 6.08 |
| O=C(CC1)[C@]2([H])[C@@]31[C@@H](C)[C@H](O)[C@](C)(C=C)C[C@@H](OC(CSC4=CC=C(C)CNC(C4=C(C)C=C=C4)=O)=O)[C@]2(C)[C@H](C)CC3                    | 6.08 |
| O=C(CC1)[C@]2([H])[C@@]31[C@@H](C)[C@H](O)[C@](C)(C=C)C[C@@H](OC(CSCC4=CSC(NC(C5CCCN5)=O)=N4)=O)[C@]2(C)[C@H](C)CC3                         | 6.08 |
| O=C(CC1)[C@]2([H])[C@@]31[C@@H](C)[C@H](O)[C@](C)(C=C)C[C@@H](OC(CSC4=C(NC(C5=CC=C(C)C=C5)=O)C=CC=C4)=O)[C@]2(C)[C@H](C)CC3                 | 6.08 |
| O=C(CC1)[C@]2([H])[C@@]31[C@@H](C)[C@H](O)[C@](C)(C=C)C[C@@H](OC(CSC4=NN(C(C5=CC=C(F)C=C5)=O)C(N)=N4)=O)[C@]2(C)[C@H](C)CC3                 | 6.08 |
| O=C1CC[C@]2(CC[C@H]3C)[C@]1([H])[C@]3(C)[C@H](OC(CSCC(NC4=CC=C(NCC=O)C=C4C)=O)=O)C[C@@](C)(C=C)[C@@H](O)[C@@H]2C                            | 6.08 |
| O=C(CC1)[C@]2([H])[C@@]31[C@@H](C)[C@H](O)[C@](C)(C=C)C[C@@H](OC(CSC4=NN=C(C)N4/N=C/C5=CC=CC=C5F)=O)[C@]2(C)[C@H](C)CC3                     | 6.08 |
| O=C1CC[C@]2(CC[C@H]3C)[C@]1([H])[C@]3(C)[C@H](OC(CN4CCN(C(CNC5=CC=CC(F)=O)CC4)=O)C[C@@](C)(C=C)[C@@H](O)[C@@H]2C                            | 6.08 |
| O=C(CC1)[C@]2([H])[C@@]31[C@@H](C)[C@H](O)[C@](C)(C=C)C[C@@H](OC(CSC4=NN=C(C)N4/N=C/C5=CC=CC=C5O)=O)[C@]2(C)[C@H](C)CC3                     | 6.08 |
| O=C(CC1)[C@]2([H])[C@@]31[C@@H](C)[C@H](O)[C@](C)(C=C)C[C@@H](OC(CSC4=NN=C(C)N4/N=C/C5=CC=CC(O)=C5)=O)[C@]2(C)[C@H](C)CC3                   | 6.08 |
| O=C(CC1)[C@]2([H])[C@@]31[C@@H](C)[C@H](O)[C@](C)(C=C)C[C@@H](OC(CSC4=NN=C(C)N4/N=C/C5=CC=CC=C5N+([O-])=O)=O)[C@]2(C)[C@H](C)CC3            | 6.08 |
| O=C(CC1)[C@]2([H])[C@@]31[C@@H](C)[C@H](O)[C@](C)(C=C)C[C@@H](OC(CSC4=NN(C(C5=CC=CC=C5C)=O)C(N)=N4)=O)[C@]2(C)[C@H](C)CC3                   | 6.08 |
| O=C(CC1)[C@]2([H])[C@@]31[C@@H](C)[C@H](O)[C@](C)(C=C)C[C@@H](OC(N4C(C(C=CC=C5NC(C(O)=O)C(C)C=C5C4)=O)=O)[C@]2(C)[C@H](C)CC3                | 6.08 |
| O=C(CC1)[C@]2([H])[C@@]31[C@@H](C)[C@H](O)[C@](C)(C=C)C[C@@H](OC(CSC4=NN=C(C)N4/N=C/C5=CC=CC=C5N+([O-])=O)=O)[C@]2(C)[C@H](C)CC3            | 6.07 |
| O=C(CC1)[C@]2([H])[C@@]31[C@@H](C)[C@H](O)[C@](C)(C=C)C[C@@H](OC(CSC4=NN(C(C5=CC=CC=C5C)=O)C(N)=N4)=O)[C@]2(C)[C@H](C)CC3                   | 6.08 |
| O=C(CC1)[C@]2([H])[C@@]31[C@@H](C)[C@H](O)[C@](C)(C=C)C[C@@H](OC(N4C(C(C=CC=C5NC(C(O)=O)C(C)C=C5C4)=O)=O)[C@]2(C)[C@H](C)CC3                | 6.07 |
| O=C(CC1)[C@]2([H])[C@@]31[C@@H](C)[C@H](O)[C@](C)(C=C)C[C@@H](OC(CSC4=CC(CO)=CC=N4)=O)[C@]2(C)[C@H](C)CC3                                   | 6.14 |
| O=C1CC[C@]2(CC[C@H]3C)[C@]1([H])[C@]3(C)[C@H](OC(CN4CCN(C(CN(CCC)CCC)=O)CC4)=O)C[C@@](C)(C=C)[C@@H](O)[C@@H]2C                              | 6.07 |
| CC1C23C(C(C3)=O)C(C(C(C=C(C)C1O)OC(CN4CCN(C(CN5CCN(C)CC5)=O)CC4)=O)(C(C2)C)C                                                                | 6.07 |
| O=C1CC[C@]2(CC[C@H]3C)[C@]1([H])[C@]3(C)[C@H](OC(CN4CCN(C(NCC5=C([CF3])C=CC=C5)=O)CC4)=O)C[C@@](C)(C=C)[C@@H](O)[C@@H]2C                    | 6.07 |
| O=C(CC1)[C@]2([H])[C@@]31[C@@H](C)[C@H](O)[C@](C)(C=C)C[C@@H](OC(CN4CCN(C(NCC5=CC=CC=C5)=O)CC4)=O)[C@]2(C)[C@H](C)CC3                       | 6.06 |
| O=C1CC[C@]2(CC[C@H]3C)[C@]1([H])[C@]3(C)[C@H](OC(CN4CCN(C(CNC5=CC=CC=C5)=O)CC4)=O)C[C@@](C)(C=C)[C@@H](O)[C@@H]2C                           | 6.06 |
| O=C(CC1)[C@]2([H])[C@@]31[C@@H](C)[C@H](O)[C@](C)(C=C)C[C@@H](OC(CSC4=NN=C(C)N4/N=C/C5=CC=CC=C5)=O)[C@]2(C)[C@H](C)CC3                      | 6.06 |
| O=C1CC[C@]2(CC[C@H]3C)[C@]1([H])[C@]3(C)[C@H](OC(CN4CCN(C5=CC=C([N+])([O-])=O)C=C5)CC4)=O)C[C@@](C)(C=C)[C@@H](O)[C@@H]2C                   | 6.06 |
| O=C(CC1)[C@]2([H])[C@@]31[C@@H](C)[C@H](O)[C@](C)(C=C)C[C@@H](OC(N4C(C(C=C(NC(C)C(O)=O)C=C5)=C5C4)=O)=O)[C@]2(C)[C@H](C)CC3                 | 6.05 |
| O=C(CC1)[C@]2([H])[C@@]31[C@@H](C)[C@H](O)[C@](C)(C=C)C[C@@H](OC(N4C(C(C=CC(N5CCOCC5)=C6)=C6C4)=O)=O)[C@]2(C)[C@H](C)CC3                    | 6.05 |
| O=C1CC[C@]2(CC[C@H]3C)[C@]1([H])[C@]3(C)[C@H](OC(CN4CCN(C(CN(C)CC)=O)CC4)=O)C[C@@](C)(C=C)[C@@H](O)[C@@H]2C                                 | 6.05 |
| O=C(CC1)[C@]2([H])[C@@]31[C@@H](C)[C@H](O)[C@](C)(C=C)C[C@@H](OC(CS(SC4=NN=C(S)S4)=O)=O)[C@]2(C)[C@H](C)CC3                                 | 6.05 |
| O=C1CC[C@]2(CC[C@H]3C)[C@]1([H])[C@]3(C)[C@H](OC(CN4CCN(C(CN5CCCC5)=O)CC4)=O)C[C@@](C)(C=C)[C@@H](O)[C@@H]2C                                | 6.05 |
| O=C(CC1)[C@]2([H])[C@@]31[C@@H](C)[C@H](O)[C@](C)(C=C)C[C@@H](OC(CSCC4=C(O)C(C=CO4)=O)=O)[C@]2(C)[C@H](C)CC3                                | 6.14 |
| O=C(CC1)[C@]2([H])[C@@]31[C@@H](C)[C@H](O)[C@](C)(C=C)C[C@@H](OC(CS(S(C4=NN=C(C)S4)=O)=O)=O)[C@]2(C)[C@H](C)CC3                             | 6.05 |
| O=C(CC1)[C@]2([H])[C@@]31[C@@H](C)[C@H](O)[C@](C)(C=C)C[C@@H](OC(CN4CCN(C5=CC=CC=C5OC)CC4)=O)[C@]2(C)[C@H](C)CC3                            | 6.04 |
| O=C(CC1)[C@]2([H])[C@@]31[C@@H](C)[C@H](O)[C@](C)(C=C)C[C@@H](OC(CSC4=NN=C(C5=CC=C(C)C=C5O4)=O)[C@]2(C)[C@H](C)CC3                          | 6.04 |
| O=C(CC1)[C@]2([H])[C@@]31[C@@H](C)[C@H](O)[C@](C)(C=C)C[C@@H](OC(CSC4=CC(C=NN)=CN=C4)=O)[C@]2(C)[C@H](C)CC3                                 | 6.14 |
| O=C1CC[C@]2(CC[C@H]3C)[C@]1([H])[C@]3(C)[C@H](OC(CSC4=NC(N5CCN(C)CC5)=CC(C)=N4)=O)C[C@@](C)(C=C)[C@@H](O)[C@@H]2C                           | 6.13 |
| O=C(CC1)[C@]2([H])[C@@]31[C@@H](C)[C@H](O)[C@](C)(C=C)C[C@@H](OC(CN4CCN(C5=CC=CC=C5O)CC4)=O)[C@]2(C)[C@H](C)CC3                             | 6.03 |
| O=C1CC[C@]2(CC[C@H]3C)[C@]1([H])[C@]3(C)[C@H](OC(CN4CCN(C5=CC=CC=C5O)CC4)=O)C[C@@](C)(C=C)[C@@H](O)[C@@H]2C                                 | 6.03 |
| O=C(CC1)[C@]2([H])[C@@]31[C@@H](C)[C@H](O)[C@](C)(C=C)C[C@@H](OC(CS(S(C4=NC=CC=C4)=O)=O)[C@]2(C)[C@H](C)CC3                                 | 6.03 |
| O=C(CC1)[C@]2([H])[C@@]31[C@@H](C)[C@H](O)[C@](C)(C=C)C[C@@H](OC(CN4N=NC(C5=CC=CC=C5C)C=C5O4)=O)[C@]2(C)[C@H](C)CC3                         | 6.03 |
| O=C1CC[C@]2(CC[C@H]3C)[C@]1([H])[C@]3(C)[C@H](OC(CN4CCN(C(CN(C)C)=O)CC4)=O)C[C@@](C)(C=C)[C@@H](O)[C@@H]2C                                  | 6.03 |
| O=C(CC1)[C@]2([H])[C@@]31[C@@H](C)[C@H](O)[C@](C)(C=C)C[C@@H](OC(CN4N=NC(C5=CC=CC=C5C#N)=C4)=O)[C@]2(C)[C@H](C)CC3                          | 6.03 |
| O=C(CC1)[C@]2([H])[C@@]31[C@@H](C)[C@H](O)[C@](C)(C=C)C[C@@H](OC(CS(SC4=NNC(N)=N4)=O)=O)[C@]2(C)[C@H](C)CC3                                 | 6.02 |
| O=C(CC1)[C@]2([H])[C@@]31[C@@H](C)[C@H](O)[C@](C)(C=C)C[C@@H](OC(N4C(C(C=CC=C5N+([O-])=O)C5C4)=O)=O)[C@]2(C)[C@H](C)CC3                     | 6.02 |
| O=C(CC1)[C@]2([H])[C@@]31[C@@H](C)[C@H](O)[C@](C)(C=C)C[C@@H](OC(N4C(C(C=C([N+])([O-])=O)C=C5)=C5C4)=O)=O)[C@]2(C)[C@H](C)CC3               | 6.02 |
| O=C1CC[C@]2(CC[C@H]3C)[C@]1([H])[C@]3(C)[C@H](OC(CN4CCN(C5=CC=CC=C5)CC4)=O)C[C@@](C)(C=C)[C@@H](O)[C@@H]2C                                  | 6.02 |
| [H][C@]12CC[C@](C)[C@](C1)(SCC(O[C@@]3C[C@@](C=C)([C@@](O)[C@](C)([C@]45CCC([C@]4([C@]3([C@](C)(CC5)[H])C)[H])=O)[H])([H])C)[H])=O)[H])(N2C | 6.02 |
| [H]                                                                                                                                         |      |
| O=C1CC[C@]2(CC[C@H]3C)[C@]1([H])[C@]3(C)[C@H](OC(CSC4=CC=CC(C(O)=O)=C4)=O)C[C@@](C)(C=C)[C@@H](O)[C@@H]2C                                   | 6.01 |
| O=C(CC1)[C@]2([H])[C@@]31[C@@H](C)[C@H](O)[C@](C)(C=C)C[C@@H](OC(CSC4=CC(C=NN)=CC=N4)=O)[C@]2(C)[C@H](C)CC3                                 | 6.01 |
| O=C(CC1)[C@]2([H])[C@@]31[C@@H](C)[C@H](O)[C@](C)(C=C)C[C@@H](OC(CS(SC4=NNC(N)=N4)=O)=O)[C@]2(C)[C@H](C)CC3                                 | 6.01 |
| O=C(CC1)[C@]2([H])[C@@]31[C@@H](C)[C@H](O)[C@](C)(C=C)C[C@@H](OC(CS(SC4=NNC(N)=N4)=O)=O)[C@]2(C)[C@H](C)CC3                                 | 6.01 |
| O=C(CC1)[C@]2([H])[C@@]31[C@@H](C)[C@H](O)[C@](C)(C=C)C[C@@H](OC(CSCC4=CC(C(O)=C(CN5CCCC(O)C5)O4)=O)=O)[C@]2(C)[C@H](C)CC3                  | 6.10 |
| O=C1CC[C@]2(CC[C@H]3C)[C@]1([H])[C@]3(C)[C@H](OC(CSCCN(CC)CC)=O)C[C@@](C)(C=C)[C@@H](O)[C@@H]2C                                             | 5.99 |
| O=C(CC1)[C@]2([H])[C@@]31[C@@H](C)[C@H](O)[C@](C)(C=C)C[C@@H](OC(CSC4=NN=C(N)S4)=O)[C@]2(C)[C@H](C)CC3                                      | 5.99 |
| O=C(CC1)[C@]2([H])[C@@]31[C@@H](C)[C@H](O)[C@](C)(C=C)C[C@@H](OC(CSC4=CC(C#N)=CC=N4)=O)[C@]2(C)[C@H](C)CC3                                  | 6.12 |
| O=C(CC1)[C@]2([H])[C@@]31[C@@H](C)[C@H](O)[C@](C)(C=C)C[C@@H](OC(CNCCC4=CC=C54)=O)[C@]2(C)[C@H](C)CC3                                       | 5.99 |
| O=C(CC1)[C@]2([H])[C@@]31[C@@H](C)[C@H](O)[C@](C)(C=C)C[C@@H](OC(CSC4=NC=CC(C)=N4)=O)[C@]2(C)[C@H](C)CC3                                    | 5.99 |
| O=C(CC1)[C@]2([H])[C@@]31[C@@H](C)[C@H](O)[C@](C)(C=C)C[C@@H](OC(CSC4=NC=CC(C)=N4)=O)[C@]2(C)[C@H](C)CC3                                    | 5.99 |
| O=C(CC1)[C@]2([H])[C@@]31[C@@H](C)[C@H](O)[C@](C)(C=C)C[C@@H](OC(CNCCS=O)(C)=O)=O)[C@]2(C)[C@H](C)CC3                                       | 5.99 |

|                                                                                                                                                         |      |
|---------------------------------------------------------------------------------------------------------------------------------------------------------|------|
| O=C(CC1)[C@2]([H])[C@@31[C@@H](C)[C@H](O)[C@](C)(C=C)C[C@@H](OC(CNCCC4=CC=CC=C4)=O)[C@2](C)[C@H](C)CC3                                                  | 5.98 |
| O=C(CC1)[C@2]([H])[C@@31[C@@H](C)[C@H](O)[C@](C)(C=C)C[C@@H](OC(CSC4=NC=C54)=O)[C@2](C)[C@H](C)CC3                                                      | 5.98 |
| O=C(CC1)[C@2]([H])[C@@31[C@@H](C)[C@H](O)[C@](C)(C=C)C[C@@H](OC(CSC4=CC=C54)=O)[C@2](C)[C@H](C)CC3                                                      | 5.98 |
| O=C(CC1)[C@2]([H])[C@@31[C@@H](C)[C@H](O)[C@](C)(C=C)C[C@@H](OC(CSC4=NC=CN4C)=O)[C@2](C)[C@H](C)CC3                                                     | 5.98 |
| O=C(CC1)[C@2]([H])[C@@31[C@@H](C)[C@H](O)[C@](C)(C=C)C[C@@H](OC(CSCC4=CC=CO4)=O)[C@2](C)[C@H](C)CC3                                                     | 5.98 |
| O=C(CC1)[C@2]([H])[C@@31[C@@H](C)[C@H](O)[C@](C)(C=C)C[C@@H](OC(CSC4=NC=CN4C)=O)[C@2](C)[C@H](C)CC3                                                     | 5.98 |
| O=C(CC1)[C@2]([H])[C@@31[C@@H](C)[C@H](O)[C@](C)(C=C)C[C@@H](OC(CSCC4=CC=CO4)=O)[C@2](C)[C@H](C)CC3                                                     | 5.98 |
| O=C(CC1)[C@2]([H])[C@@31[C@@H](C)[C@H](O)[C@](C)(C=C)C[C@@H](OC(CNCCSC)=O)[C@2](C)[C@H](C)CC3                                                           | 5.96 |
| O=C(CC1)[C@2]([H])[C@@31[C@@H](C)[C@H](O)[C@](C)(C=C)C[C@@H](OC(CSC4=CC(F)=CN=C4)=O)[C@2](C)[C@H](C)CC3                                                 | 6.12 |
| O=C(CC1)[C@2]([H])[C@@31[C@@H](C)[C@H](O)[C@](C)(C=C)C[C@@H](OC(CN4CCOCC4)=O)[C@2](C)[C@H](C)CC3                                                        | 5.95 |
| O=C(CC1)[C@2]([H])[C@@31[C@@H](C)[C@H](O)[C@](C)(C=C)C[C@@H](OC(CSC4=CC=C(N)C=N4)=O)[C@2](C)[C@H](C)CC3                                                 | 6.11 |
| O=C(CC1)[C@2]([H])[C@@31[C@@H](C)[C@H](O)[C@](C)(C=C)C[C@@H](OC(CN4CCN(C/C=C/C5=CC=CC=C5Cl)=O)CC4)=O)[C@2](C)[C@H](C)CC3                                | 5.91 |
| O=C(CC1)[C@2]([H])[C@@31[C@@H](C)[C@H](O)[C@](C)(C=C)C[C@@H](OC(CN4CCN(C/C=C/C5=CC(Cl)=CC=C5)=O)CC4)=O)[C@2](C)[C@H](C)CC3                              | 5.91 |
| O=C(CC1)[C@2]([H])[C@@31[C@@H](C)[C@H](O)[C@](C)(C=C)C[C@@H](OC(CSC4=C(NC(CN5N=NC(CN6CCN(C7=CC=CC=C7Cl)CC6)=C5)=O)C=CC=C4)=O)[C@2](C)[C@H](C)CC3        | 5.90 |
| O=C(CC1)[C@2]([H])[C@@31[C@@H](C)[C@H](O)[C@](C)(C=C)C[C@@H](OC(CSC4=C(NC(CN5N=NC(CN6CCN(C7=CC=CC(OC)C=C7)CC6)=C5)=O)C=CC=C4)=O)[C@2](C)[C@H](C)CC3     | 5.90 |
| O=C(CC1)[C@2]([H])[C@@31[C@@H](C)[C@H](O)[C@](C)(C=C)C[C@@H](OC(CN4CCN(C/C=C/C5=CC(F)=CC=C5)=O)CC4)=O)[C@2](C)[C@H](C)CC3                               | 5.90 |
| O=C(CC1)[C@2]([H])[C@@31[C@@H](C)[C@H](O)[C@](C)(C=C)C[C@@H](OC(CN4CCN(C/C=C/C5=CC(C)=CC=C5)=O)CC4)=O)[C@2](C)[C@H](C)CC3                               | 5.90 |
| O=C(CC1)[C@2]([H])[C@@31[C@@H](C)[C@H](O)[C@](C)(C=C)C[C@@H](OC(CSC4=C(NC(CN5N=NC(CN6CCN(C7=CC=CC=C7F)CC6)=C5)=O)C=CC=C4)=O)[C@2](C)[C@H](C)CC3         | 5.90 |
| O=C(CC1)[C@2]([H])[C@@31[C@@H](C)[C@H](O)[C@](C)(C=C)C[C@@H](OC(CSC4=C(NC(CN5N=NC(CN6CCN(C7=CC=CC(F)C=C7)CC6)=C5)=O)C=CC=C4)=O)[C@2](C)[C@H](C)CC3      | 5.90 |
| O=C(CC1)[C@2]([H])[C@@31[C@@H](C)[C@H](O)[C@](C)(C=C)C[C@@H](OC(CSC4=C(NC(CN5N=NC(CN6CCN(C7=CC=CC(C)C=C7)CC6)=C5)=O)C=CC=C4)=O)[C@2](C)[C@H](C)CC3      | 5.89 |
| O=C(CC1)[C@2]([H])[C@@31[C@@H](C)[C@H](O)[C@](C)(C=C)C[C@@H](OC(CSC4=C(NC(CN5N=NC(CN6CCN(C7=CC=CC(C)C=C7)CC6)=C5)=O)C=CC=C4)=O)[C@2](C)[C@H](C)CC3      | 5.89 |
| O=C(CC1)[C@2]([H])[C@@31[C@@H](C)[C@H](O)[C@](C)(C=C)C[C@@H](OC(CSC4=C(NC(CN5N=NC(CN6CCN(C7=CC=CC(C)C=C7)CC6)=C5)=O)C=CC=C4)=O)[C@2](C)[C@H](C)CC3      | 5.89 |
| O=C(CC1)[C@2]([H])[C@@31[C@@H](C)[C@H](O)[C@](C)(C=C)C[C@@H](OC(CS[C@H]4CC[C@H](C)(OCC)=O)C[C@H]4NS(=O)(C5=CC=C(Br)C=C5)=O)[C@2](C)[C@H](C)CC3          | 5.89 |
| O=C(CC1)[C@2]([H])[C@@31[C@@H](C)[C@H](O)[C@](C)(C=C)C[C@@H](OC(CSC4=C(N)C=CC=N4)=O)[C@2](C)[C@H](C)CC3                                                 | 5.89 |
| O=C(CC1)[C@2]([H])[C@@31[C@@H](C)[C@H](O)[C@](C)(C=C)C[C@@H](OC(CN4CCN(C(CN5N=NC(CN6CCN(C7=CC=C([N+](O-))=O)C=C7)CC6)=C5)=O)C4)=O)[C@2](C)[C@H](C)CC3   | 5.89 |
| O=C(CC1)[C@2]([H])[C@@31[C@@H](C)[C@H](O)[C@](C)(C=C)C[C@@H](OC(CSC4CCN(C(CCN5C=NC6=C5N=C(N)N=C6N7CCC(N)CC7)=O)CC4)=O)[C@2](C)[C@H](C)CC3               | 5.88 |
| O=C(CC1)[C@2]([H])[C@@31[C@@H](C)[C@H](O)[C@](C)(C=C)C[C@@H](OC(CSC4CCN(C(CCN5C=NC6=C5N=C(N)N=C6N7CC(N)CCC7)=O)CC4)=O)[C@2](C)[C@H](C)CC3               | 5.88 |
| O=C(CC1)[C@2]([H])[C@@31[C@@H](C)[C@H](O)[C@](C)(C=C)C[C@@H](OC(CSC4CCN(C(CCN5C=NC6=C5N=C(N)N=C6N7CC(NC)CC7)=O)CC4)=O)[C@2](C)[C@H](C)CC3               | 5.88 |
| O=C(CC1)[C@2]([H])[C@@31[C@@H](C)[C@H](O)[C@](C)(C=C)C[C@@H](OC(CN4CCN(C(CN5N=NC(CN6CCN(C7=CC=C(Cl)C=C7)CC6)=C5)=O)CC4)=O)[C@2](C)[C@H](C)CC3           | 5.88 |
| O=C(CC1)[C@2]([H])[C@@31[C@@H](C)[C@H](O)[C@](C)(C=C)C[C@@H](OC(CSC4CCCN(C(CCN5C=NC6=C5N=C(N)N=C6N7CCNCC7)=O)C4)=O)[C@2](C)[C@H](C)CC3                  | 5.88 |
| O=C(CC1)[C@2]([H])[C@@31[C@@H](C)[C@H](O)[C@](C)(C=C)C[C@@H](OC(CSC4CCN(C(CCN5C=NC6=C5N=C(N)N=C6N7CC(N)CC7)=O)CC4)=O)[C@2](C)[C@H](C)CC3                | 5.88 |
| O=C(CC1)[C@2]([H])[C@@31[C@@H](C)[C@H](O)[C@](C)(C=C)C[C@@H](OC(CSC4CCN(C(CCN5C=NC6=C5N=C(N)N=C6N7CC(NC)C7)=O)CC4)=O)[C@2](C)[C@H](C)CC3                | 5.88 |
| O=C(CC1)[C@2]([H])[C@@31[C@@H](C)[C@H](O)[C@](C)(C=C)C[C@@H](OC(CS[C@H]4CC[C@H](C)(OCC)=O)C[C@H]4NS(=O)(C5=CC=C([N+](O-))=O)C=C5)=O)[C@2](C)[C@H](C)CC3 | 5.87 |
| O=C(CC1)[C@2]([H])[C@@31[C@@H](C)[C@H](O)[C@](C)(C=C)C[C@@H](OC(CN4CCN(C5=CC=C(C6NC(N)=NC(C7=CC=CC=C7[N+](O-))=O)C=C5)CC4)=O)[C@2](C)[C@H](C)CC3        | 5.87 |
| O=C(CC1)[C@2]([H])[C@@31[C@@H](C)[C@H](O)[C@](C)(C=C)C[C@@H](OC(CSC(C4)CCN4C(CCN5C=NC6=C5N=C(N)N=C6N7CCNCC7)=O)=O)[C@2](C)[C@H](C)CC3                   | 5.87 |
| O=C(CC1)[C@2]([H])[C@@31[C@@H](C)[C@H](O)[C@](C)(C=C)C[C@@H](OC(CS[C@H]4CC[C@H](C)(OCC)=O)C[C@H]4NS(=O)(C5=CC=C(F)C=C5)=O)=O)[C@2](C)[C@H](C)CC3        | 5.87 |
| O=C(CC1)[C@2]([H])[C@@31[C@@H](C)[C@H](O)[C@](C)(C=C)C[C@@H](OC(CS[C@H]4CC[C@H](C)(OCC)=O)C[C@H]4NS(=O)(C5=CC=C(F)C=C5)=O)=O)[C@2](C)[C@H](C)CC3        | 5.86 |
| O=C(CC1)[C@2]([H])[C@@31[C@@H](C)[C@H](O)[C@](C)(C=C)C[C@@H](OC(CSC4=NC(NC(C5=C5C(NC(CN6CCN(C7=CC=CC=C7)CC6)=O)N4)=O)C[C@@](C)(C=C)[C@@H](O)[C@H]2C     | 5.86 |
| O=C(CC1)[C@2]([H])[C@@31[C@@H](C)[C@H](O)[C@](C)(C=C)C[C@@H](OC(CSC4=C(NC(CN5CCN(C6=CC=CC(Cl)=C6)CC5)=O)C=CC=C4)=O)[C@2](C)[C@H](C)CC3                  | 5.86 |
| O=C(CC1)[C@2]([H])[C@@31[C@@H](C)[C@H](O)[C@](C)(C=C)C[C@@H](OC(CS[C@H]4CC[C@H](C)(OCC)=O)C[C@H]4NS(=O)(C5=CC=C(F)C=C5)=O)=O)[C@2](C)[C@H](C)CC3        | 5.86 |
| O=C(CC1)[C@2]([H])[C@@31[C@@H](C)[C@H](O)[C@](C)(C=C)C[C@@H](OC(CN4CCN(C(NCC5=CC=C(NC(CN6CCOCC6)=O)C=C5)=O)CC4)=O)[C@2](C)[C@H](C)CC3                   | 5.86 |

|                                                                                                                                                     |      |
|-----------------------------------------------------------------------------------------------------------------------------------------------------|------|
| O=C(CC1)[C@]2([H])[C@@]31[C@@H](C)[C@H](O)[C@](C)(C=C)C[C@@H](OC(CS[C@H]4CC[C@H](C(OCC)=O)C[C@H]4NS(=O)(C5=CC=C(C)C=C5)=O)=O)[C@]2(C)[C@H](C)CC3    | 5.86 |
| O=C(CC1)[C@]2([H])[C@@]31[C@@H](C)[C@H](O)[C@](C)(C=C)C[C@@H](OC(CN4N=NC(C5=CC=CC=C5CN6C7=NC=NC(N(CC)CC)=C7N=C6)=C4)=O)[C@]2(C)[C@H](C)CC3          | 5.85 |
| O=C(CC1)[C@]2([H])[C@@]31[C@@H](C)[C@H](O)[C@](C)(C=C)C[C@@H](OC(CN4N=NC(C5=CC=CC(CN6C7=NC=NC(N(CC)CC)=C7N=C6)=C5)=C4)=O)[C@]2(C)[C@H](C)CC3        | 5.85 |
| O=C(CC1)[C@]2([H])[C@@]31[C@@H](C)[C@H](O)[C@](C)(C=C)C[C@@H](OC(CSC4=C(NC(CN5N=NC(CN6CCC(O)CC6)=C5)=O)C=CC=C4)=O)[C@]2(C)[C@H](C)CC3               | 5.85 |
| O=C(CC1)[C@]2([H])[C@@]31[C@@H](C)[C@H](O)[C@](C)(C=C)C[C@@H](OC(CN4CCN(CC4)C(CCN5C=NC6=C5N=CN=C6N7CCC(C7)N)=O)=O)[C@]2(C)[C@H](C)CC3               | 5.85 |
| O=C(CC1)[C@]2([H])[C@@]31[C@@H](C)[C@H](O)[C@](C)(C=C)C[C@@H](OC(CSC4=C(NC(CN5CCN(C6=C(O)C=CC=C6)CC5)=O)C=CC=C4)=O)[C@]2(C)[C@H](C)CC3              | 5.85 |
| O=C(CC1)[C@]2([H])[C@@]31[C@@H](C)[C@H](O)[C@](C)(C=C)C[C@@H](OC(CSC4=C(NC(CN5CCN(C6=CC=C(O)C=C6)CC5)=O)C=CC=C4)=O)[C@]2(C)[C@H](C)CC3              | 5.85 |
| O=C(CC1)[C@]2([H])[C@@]31[C@@H](C)[C@H](O)[C@](C)(C=C)C[C@@H](OC(CN4CCN(C5=CC=C(C/C=C/C6=CC=CC([N+])([O-])=O)=C6)=O)C=C5)CC4)=O)[C@]2(C)[C@H](C)CC3 | 5.84 |
| O=C(CC1)[C@]2([H])[C@@]31[C@@H](C)[C@H](O)[C@](C)(C=C)C[C@@H](OC(CN4CCN(C5=CC=C(C/C=C/C6=CC=CC=C6[N+])([O-])=O)=O)C=C5)CC4)=O)[C@]2(C)[C@H](C)CC3   | 5.84 |
| O=C(CC1)[C@]2([H])[C@@]31[C@@H](C)[C@H](O)[C@](C)(C=C)C[C@@H](OC(CN4CCN(C5=CC=C(C/C=C/C6=CC=C(C=C6)N(C)C)=O)C=C5)CC4)=O)[C@]2(C)[C@H](C)CC3         | 5.84 |
| O=C1CC[C@]2(CC[C@H]3C)[C@]1([H])[C@]3(C)[C@H](OC(CSC4=NC(NC=C5)=C5C(NC(CN6CCC(N(C)O)CC6)=O)=N4)=O)C[C@@](C)(C=C)[C@@H](O)[C@@H]2C                   | 5.84 |
| O=C(CC1)[C@]2([H])[C@@]31[C@@H](C)[C@H](O)[C@](C)(C=C)C[C@@H](OC(N4CC5=C(C=CC=C5OCCCCN6C=NC(C7=CC=CN=C7)=C6)C4=O)=O)[C@]2(C)[C@H](C)CC3             | 5.84 |
| O=C(CC1)[C@]2([H])[C@@]31[C@@H](C)[C@H](O)[C@](C)(C=C)C[C@@H](OC(CN4CCN(C(NC5=CC=CC(NC(OC(C)(C)C)=O)=C5)=O)CC4)=O)[C@]2(C)[C@H](C)CC3               | 5.83 |
| O=C(CC1)[C@]2([H])[C@@]31[C@@H](C)[C@H](O)[C@](C)(C=C)C[C@@H](OC(CN4CCN(C(CN5CCN(C6=CC=CC=C6O)CC5)=O)CC4)=O)[C@]2(C)[C@H](C)CC3                     | 5.83 |
| O=C1CC[C@]2(CC[C@H]3C)[C@]1([H])[C@]3(C)[C@H](OC(CSC4=NC(N)=CC(NC(CN5CCCC(CCO)C5)=O)=N4)=O)C[C@@](C)(C=C)[C@@H](O)[C@@H]2C                          | 5.83 |
| O=C(CC1)[C@]2([H])[C@@]31[C@@H](C)[C@H](O)[C@](C)(C=C)C[C@@H](OC(CSC4=NC(NC(CN5CCCC(CCO)CC5)=O)=CC(N)=N4)=O)[C@]2(C)[C@H](C)CC3                     | 5.83 |
| O=C(CC1)[C@]2([H])[C@@]31[C@@H](C)[C@H](O)[C@](C)(C=C)C[C@@H](OC(CSC4=NN(C(C5=C(F)C(F)=C(F)C(F)=C5F)=O)C(N)=N4)=O)[C@]2(C)[C@H](C)CC3               | 5.83 |
| O=C1CC[C@]2(CC[C@H]3C)[C@]1([H])[C@]3(C)[C@H](OC(CSC4=NC(NC=C5)=C5C(NC(CN6CCN(C)CC6)=O)=N4)=O)C[C@@](C)(C=C)[C@@H](O)[C@@H]2C                       | 5.82 |
| O=C1CC[C@]2(CC[C@H]3C)[C@]1([H])[C@]3(C)[C@H](OC(CSC4=NC(NC=C5)=C5C(NC(CN6CCCCC6)=O)=N4)=O)C[C@@](C)(C=C)[C@@H](O)[C@@H]2C                          | 5.82 |
| CC1C23C(C(C23)=O)C(C(C(C(C=C)C)C)O)OC(CN4CCN(C(CN5CCN(C6=C(O)C=CC=C6)CC5)=O)CC4)=O)(C(C22)C)C                                                       | 5.82 |
| O=C(CC1)[C@]2([H])[C@@]31[C@@H](C)[C@H](O)[C@](C)(C=C)C[C@@H](OC(CSC4=NN(C(C5=CC=C(OC(F)F)C=C5)=O)C(N)=N4)=O)[C@]2(C)[C@H](C)CC3                    | 5.82 |
| O=C(CC1)[C@]2([H])[C@@]31[C@@H](C)[C@H](O)[C@](C)(C=C)C[C@@H](OC(CN4CCN(C/C=C/C5=CC(Br)=CC=C5)=O)CC4)=O)[C@]2(C)[C@H](C)CC3                         | 5.82 |
| O=C(CC1)[C@]2([H])[C@@]31[C@@H](C)[C@H](O)[C@](C)(C=C)C[C@@H](OC(CSCC4=C5C(NC(CN(CCO)CCO)=O)=N4)=O)[C@]2(C)[C@H](C)CC3                              | 5.81 |
| O=C(CC1)[C@]2([H])[C@@]31[C@@H](C)[C@H](O)[C@](C)(C=C)C[C@@H](OC(CSC4=NN(C(C5=CC(Cl)=CC(Cl)=C5)=O)C(N)=N4)=O)[C@]2(C)[C@H](C)CC3                    | 5.81 |
| O=C(CC1)[C@]2([H])[C@@]31[C@@H](C)[C@H](O)[C@](C)(C=C)C[C@@H](OC(CN4N=NC(CN5CCN(C6=CC=CC=C6[N+])([O-])=O)CC5)=C4)=O)[C@]2(C)[C@H](C)CC3             | 5.81 |
| O=C(CC1)[C@]2([H])[C@@]31[C@@H](C)[C@H](O)[C@](C)(C=C)C[C@@H](OC(CSC4=NN(C(C5=CC=C(C(F)F)C=C5)=O)C(N)=N4)=O)[C@]2(C)[C@H](C)CC3                     | 5.81 |
| O=C(CC1)[C@]2([H])[C@@]31[C@@H](C)[C@H](O)[C@](C)(C=C)C[C@@H](OC(CSC4=NN(C(C)N4/N=C/C5=CC=C(N6CCCC6)=C5)=O)[C@]2(C)[C@H](C)CC3                      | 5.81 |
| O=C(CC1)[C@]2([H])[C@@]31[C@@H](C)[C@H](O)[C@](C)(C=C)C[C@@H](OC(CN4CCN(C(NCC5=C(C(F)F)C=CC=C5)=O)CC4)=O)[C@]2(C)[C@H](C)CC3                        | 5.81 |
| O=C(CC1)[C@]2([H])[C@@]31[C@@H](C)[C@H](O)[C@](C)(C=C)C[C@@H](OC(CN4CCN(C(NC5=CC=C(Br)C=N5)=O)CC4)=O)[C@]2(C)[C@H](C)CC3                            | 5.81 |
| O=C(CC1)[C@]2([H])[C@@]31[C@@H](C)[C@H](O)[C@](C)(C=C)C[C@@H](OC(CN4N=NC(C5=CC=CC=C5CN(C(N6)=O)C=C(C)C6=O)=C4)=O)[C@]2(C)[C@H](C)CC3                | 5.81 |
| O=C(CC1)[C@]2([H])[C@@]31[C@@H](C)[C@H](O)[C@](C)(C=C)C[C@@H](OC(CN4N=NC(C5=CC=CC(CN(C6)=O)C=C(C)C6=O)=C5)=C4)=O)[C@]2(C)[C@H](C)CC3                | 5.81 |
| O=C(CC1)[C@]2([H])[C@@]31[C@@H](C)[C@H](O)[C@](C)(C=C)C[C@@H](OC(CSCC4=C5C(NC(CNCC(OC)=O)=O)=N4)=O)[C@]2(C)[C@H](C)CC3                              | 5.80 |
| O=C(CC1)[C@]2([H])[C@@]31[C@@H](C)[C@H](O)[C@](C)(C=C)C[C@@H](OC(CN4CCN(C(NC5=CC=CC(C(F)F)C=C5)=O)CC4)=O)[C@]2(C)[C@H](C)CC3                        | 5.80 |
| O=C(CC1)[C@]2([H])[C@@]31[C@@H](C)[C@H](O)[C@](C)(C=C)C[C@@H](OC(CSC4=NN(C(C5=CC=C(F)C=C5Cl)=O)C(N)=N4)=O)[C@]2(C)[C@H](C)CC3                       | 5.80 |
| O=C(CC1)[C@]2([H])[C@@]31[C@@H](C)[C@H](O)[C@](C)(C=C)C[C@@H](OC(CSC4=NN(C(C5=C(F)C=CC=C5Cl)=O)C(N)=N4)=O)[C@]2(C)[C@H](C)CC3                       | 5.80 |
| O=C(CC1)[C@]2([H])[C@@]31[C@@H](C)[C@H](O)[C@](C)(C=C)C[C@@H](OC(CSC4=NN(C(NC(C5=C(OC)C=CC=C5)=O)S4)=O)[C@]2(C)[C@H](C)CC3                          | 5.80 |
| O=C(CC1)[C@]2([H])[C@@]31[C@@H](C)[C@H](O)[C@](C)(C=C)C[C@@H](OC(CSC4=CC(NC(CN5CCC[C@H]5CN)=O)=CN=C4)=O)[C@]2(C)[C@H](C)CC3                         | 5.80 |
| O=C(CC1)[C@]2([H])[C@@]31[C@@H](C)[C@H](O)[C@](C)(C=C)C[C@@H](OC(CS(S(C4=NC5=C(C=CC(Cl)=C5)S4)=O)=O)[C@]2(C)[C@H](C)CC3                             | 5.80 |
| O=C(CC1)[C@]2([H])[C@@]31[C@@H](C)[C@H](O)[C@](C)(C=C)C[C@@H](OC(CN4N=NC(C5=CC=CC(C6=CC=CC(CO)=C6)=C5)=C4)=O)[C@]2(C)[C@H](C)CC3                    | 5.80 |
| O=C(CC1)[C@]2([H])[C@@]31[C@@H](C)[C@H](O)[C@](C)(C=C)C[C@@H](OC(CSC4=NN(C(C)N4/N=C/C5=CC=CC([N+])([O-])=O)=C5)=O)[C@]2(C)[C@H](C)CC3               | 5.80 |
| O=C(CC1)[C@]2([H])[C@@]31[C@@H](C)[C@H](O)[C@](C)(C=C)C[C@@H](OC(CSC4=NN(C(C)N4/N=C/C5=CC=CC([N+])([O-])=O)=C5)=O)[C@]2(C)[C@H](C)CC3               | 5.80 |
| O=C(CC1)[C@]2([H])[C@@]31[C@@H](C)[C@H](O)[C@](C)(C=C)C[C@@H](OC(CSCC4=C5C(NC(CNCC(OC)=O)=O)=N4)=O)[C@]2(C)[C@H](C)CC3                              | 5.79 |
| O=C(CC1)[C@]2([H])[C@@]31[C@@H](C)[C@H](O)[C@](C)(C=C)C[C@@H](OC(CSC4=C(NC(C5=C(OC)C=CC=C5)=O)C=CC=C4)=O)[C@]2(C)[C@H](C)CC3                        | 5.79 |
| O=C(CC1)[C@]2([H])[C@@]31[C@@H](C)[C@H](O)[C@](C)(C=C)C[C@@H](OC(CSC4=C(NC(C5=CC=CC(OC)=C5)=O)C=CC=C4)=O)[C@]2(C)[C@H](C)CC3                        | 5.79 |
| O=C(CC1)[C@]2([H])[C@@]31[C@@H](C)[C@H](O)[C@](C)(C=C)C[C@@H](OC(CSC4=C(NC(C5=CC=C(OC)C=C5)=O)C=CC=C4)=O)[C@]2(C)[C@H](C)CC3                        | 5.79 |
| O=C(CC1)[C@]2([H])[C@@]31[C@@H](C)[C@H](O)[C@](C)(C=C)C[C@@H](OC(CN4N=NC(CN5CCN(C6=CC=CC=C6)CC5)=C4)=O)[C@]2(C)[C@H](C)CC3                          | 5.79 |
| O=C(CC1)[C@]2([H])[C@@]31[C@@H](C)[C@H](O)[C@](C)(C=C)C[C@@H](OC(CN4N=NC(CN5CCN(C6=CC=CC(C)C=C6)CC5)=C4)=O)[C@]2(C)[C@H](C)CC3                      | 5.79 |
| O=C1CC[C@]2(CC[C@H]3C)[C@]1([H])[C@]3(C)[C@H](OC(CN4CCN(C([C@H](C)NC(OC(C)(C)C)=O)=O)CC4)=O)C[C@@](C)(C=C)[C@@H](O)[C@@H]2C                         | 5.79 |
| O=C(CC1)[C@]2([H])[C@@]31[C@@H](C)[C@H](O)[C@](C)(C=C)C[C@@H](OC(CN4CCN(C(NC5=CC=CC6=C5C=CC=N6)=O)CC4)=O)[C@]2(C)[C@H](C)CC3                        | 5.79 |
| O=C(CC1)[C@]2([H])[C@@]31[C@@H](C)[C@H](O)[C@](C)(C=C)C[C@@H](OC(CSC4=NN(C(C)N4/N=C/C5=CC=CC=C5Cl)=O)[C@]2(C)[C@H](C)CC3                            | 5.79 |

|                                                                                                                                   |      |
|-----------------------------------------------------------------------------------------------------------------------------------|------|
| O=C(CC1)[C@]2([H])[C@@]31[C@@H](C)[C@H](O)[C@](C)(C=C)C[C@@H](OC(CSC4=NN=C(C)N4/N=C/C5=CC=CC(C)=C5=O)[C@]2(C)[C@H](C)CC3          | 5.79 |
| O=C(CC1)[C@]2([H])[C@@]31[C@@H](C)[C@H](O)[C@](C)(C=C)C[C@@H](OC(CSC4=NN=C(C5=CC=CC=C5O)=O)C(N)=N4=O)[C@]2(C)[C@H](C)CC3          | 5.79 |
| N[C@@H](CC1=CC=C(O)C=C1)C(N(CC2)CCN2CC(OC[C@@H]([C@]3(C)[C@H](C)CC4)C[C@@](C)(C=C)[C@@H](O)[C@H](C)[C@@]54[C@@]3([H])C(CC5)=O)=O) | 5.79 |
| O=C(CC1)[C@]2([H])[C@@]31[C@@H](C)[C@H](O)[C@](C)(C=C)C[C@@H](OC(CSCC4=CSC(NC(CNCCO)=O)=N4=O)[C@]2(C)[C@H](C)CC3                  | 5.78 |
| O=C(CC1)[C@]2([H])[C@@]31[C@@H](C)[C@H](O)[C@](C)(C=C)C[C@@H](OC(CSC4=C(NC(C5=CC=C(F)C=C5)=O)C=CC=C4)=O)[C@]2(C)[C@H](C)CC3       | 5.78 |
| O=C(CC1)[C@]2([H])[C@@]31[C@@H](C)[C@H](O)[C@](C)(C=C)C[C@@H](OC(CSC4=NN=C(NC(N5COCC5)=O)S4=O)[C@]2(C)[C@H](C)CC3                 | 5.78 |
| O=C(CC1)[C@]2([H])[C@@]31[C@@H](C)[C@H](O)[C@](C)(C=C)C[C@@H](OC(CSCC4=CSC(NC([C@@]([H])(N)C(C)C)=O)=N4=O)[C@]2(C)[C@H](C)CC3     | 5.78 |
| O=C(CC1)[C@]2([H])[C@@]31[C@@H](C)[C@H](O)[C@](C)(C=C)C[C@@H](OC(CSC4=NN=C(C5=CC=CC(C(F)(F)F)=C5)N4=O)[C@]2(C)[C@H](C)CC3         | 5.78 |
| O=C(CC1)[C@]2([H])[C@@]31[C@@H](C)[C@H](O)[C@](C)(C=C)C[C@@H](OC(CSC(C)C)CNC(C4=CC=C(Cl)C=C4)=O)[C@]2(C)[C@H](C)CC3               | 5.78 |
| O=C(CC1)[C@]2([H])[C@@]31[C@@H](C)[C@H](O)[C@](C)(C=C)C[C@@H](OC(CSC4=C(NC(C5=CC=CC(C)=O)C=CC=C4)=O)[C@]2(C)[C@H](C)CC3           | 5.78 |
| O=C(CC1)[C@]2([H])[C@@]31[C@@H](C)[C@H](O)[C@](C)(C=C)C[C@@H](OC(CSC4=NN=C(C)N4/N=C/C5=CC=CC(C[N+]#C-)]C5=O)[C@]2(C)[C@H](C)CC3   | 5.78 |
| O=C(CC1)[C@]2([H])[C@@]31[C@@H](C)[C@H](O)[C@](C)(C=C)C[C@@H](OC(CSC4=NN=C(C)N4/N=C/C5=CC=C([N+]#C-)C=C5=O)[C@]2(C)[C@H](C)CC3    | 5.78 |
| O=C(CC1)[C@]2([H])[C@@]31[C@@H](C)[C@H](O)[C@](C)(C=C)C[C@@H](OC(CN4N=NC(/C=C/CN5C(N=CN=C6N)=C6N=C5)=C4=O)[C@]2(C)[C@H](C)CC3     | 5.78 |
| O=C(CC1)[C@]2([H])[C@@]31[C@@H](C)[C@H](O)[C@](C)(C=C)C[C@@H](OC(CSC4=NC(N)=CC(NC([C@H](N)C(C)C)=O)=N4=O)[C@]2(C)[C@H](C)CC3      | 5.78 |
| O=C1CC[C@]2(CC[C@H]3C)[C@]1([H])[C@]3(C)[C@H](OC(CSC4=NC(O)=CC(NC([C@@H](C)C(O)C)=O)=N4=O)C[C@@](C)(C=C)[C@@H](O)[C@@H]2C         | 5.78 |
| O=C(CC1)[C@]2([H])[C@@]31[C@@H](C)[C@H](O)[C@](C)(C=C)C[C@@H](OC(CSC4=NN=C(C5=CC=CC=C5F)=O)C(N)=N4=O)[C@]2(C)[C@H](C)CC3          | 5.78 |
| O=C(CC1)[C@]2([H])[C@@]31[C@@H](C)[C@H](O)[C@](C)(C=C)C[C@@H](OC(CSC4=NN=C(C)N4/N=C/C5=CC=CC(C(F)C=C4)=O)[C@]2(C)[C@H](C)CC3      | 5.78 |
| O=C(CC1)[C@]2([H])[C@@]31[C@@H](C)[C@H](O)[C@](C)(C=C)C[C@@H](OC(CS(S(C4=NC(OC)=CC(OC)=N4)=O)=O)[C@]2(C)[C@H](C)CC3               | 5.78 |
| O=C(CC1)[C@]2([H])[C@@]31[C@@H](C)[C@H](O)[C@](C)(C=C)C[C@@H](OC(CSC4=NC(C=C([Na])C=C5)=C5N4=O)[C@]2(C)[C@H](C)CC3.O=S=O          | 5.78 |
| O=C(CC1)[C@]2([H])[C@@]31[C@@H](C)[C@H](O)[C@](C)(C=C)C[C@@H](OC(CSC4=NC(C=C([Na])C=C5)=C5N4=O)[C@]2(C)[C@H](C)CC3.O=S=O          | 5.78 |
| O=C(CC1)[C@]2([H])[C@@]31[C@@H](C)[C@H](O)[C@](C)(C=C)C[C@@H](OC(CN4CCN(C(NC5=CC=C(OC)C=C5)=O)CC4=O)[C@]2(C)[C@H](C)CC3           | 5.78 |
| O=C(CC1)[C@]2([H])[C@@]31[C@@H](C)[C@H](O)[C@](C)(C=C)C[C@@H](OC(CN4CCN(C(CCC5=CC=C(C)C=C5)=O)CC4=O)[C@]2(C)[C@H](C)CC3           | 5.77 |
| O=C(CC1)[C@]2([H])[C@@]31[C@@H](C)[C@H](O)[C@](C)(C=C)C[C@@H](OC(CN4CCN(C(C=CC(C(C)C)=O)C(C)C=C5)=CC4=O)[C@]2(C)[C@H](C)CC3       | 5.77 |
| O=C(CC1)[C@]2([H])[C@@]31[C@@H](C)[C@H](O)[C@](C)(C=C)C[C@@H](OC(CN4CCN(C(NCCC5=CC=CC=C5)=O)CC4=O)[C@]2(C)[C@H](C)CC3             | 5.77 |
| O=C1CC[C@]2(CC[C@H]3C)[C@]1([H])[C@]3(C)[C@H](OC(CSC4=NC(OCCN)=CC(C)=N4=O)C[C@@](C)(C=C)[C@@H](O)[C@@H]2C                         | 5.77 |
| O=C(CC1)[C@]2([H])[C@@]31[C@@H](C)[C@H](O)[C@](C)(C=C)C[C@@H](OC(CSC4=NN=C(C)N4/N=C/C5=CC=CC(C5)=O)[C@]2(C)[C@H](C)CC3            | 5.77 |
| O=C(CC1)[C@]2([H])[C@@]31[C@@H](C)[C@H](O)[C@](C)(C=C)C[C@@H](OC(CSC4=NN=C(C)N4/N=C/C5=CC=CC(C)=O)[C@]2(C)[C@H](C)CC3             | 5.77 |
| O=C(CC1)[C@]2([H])[C@@]31[C@@H](C)[C@H](O)[C@](C)(C=C)C[C@@H](OC(CN4CCN(C(C)C=C5=CC=CC(C5)=O)CC4=O)[C@]2(C)[C@H](C)CC3            | 5.77 |
| O=C1CC[C@]2(CC[C@H]3C)[C@]1([H])[C@]3(C)[C@H](OC(CSC4=NC(N)=CC(NC(CN(C)C)=O)=N4=O)C[C@@](C)(C=C)[C@@H](O)[C@@H]2C                 | 5.77 |
| O=C(CC1)[C@]2([H])[C@@]31[C@@H](C)[C@H](O)[C@](C)(C=C)C[C@@H](OC(CSC4=NC(NC(CN(C)C)=O)=CC(N)=N4=O)[C@]2(C)[C@H](C)CC3             | 5.77 |
| O=C1CC[C@]2(CC[C@H]3C)[C@]1([H])[C@]3(C)[C@H](OC(CN4CCN(C(CN5CCN(C)CC5)=O)CC4=O)C[C@@](C)(C=C)[C@@H](O)[C@@H]2C                   | 5.77 |
| O=C(CC1)[C@]2([H])[C@@]31[C@@H](C)[C@H](O)[C@](C)(C=C)C[C@@H](OC(CSC(C)C)CNC(C4=C(N)C=CC=C4)=O)[C@]2(C)[C@H](C)CC3                | 5.77 |
| O=C(CC1)[C@]2([H])[C@@]31[C@@H](C)[C@H](O)[C@](C)(C=C)C[C@@H](OC(CSC(C)C)CNC(C4=CC(C)=O)=O)[C@]2(C)[C@H](C)CC3                    | 5.77 |
| O=C(CC1)[C@]2([H])[C@@]31[C@@H](C)[C@H](O)[C@](C)(C=C)C[C@@H](OC(CN4CCN(C(NC5=CC=CC(F)=C5)=O)CC4=O)[C@]2(C)[C@H](C)CC3            | 5.77 |
| O=C1CC[C@]2(CC[C@H]3C)[C@]1([H])[C@]3(C)[C@H](OC(CN4CCN(C(NC5=CC=CC(F)=C5)=O)CC4=O)C[C@@](C)(C=C)[C@@H](O)[C@@H]2C                | 5.77 |
| O=C(CC1)[C@]2([H])[C@@]31[C@@H](C)[C@H](O)[C@](C)(C=C)C[C@@H](OC(CN4CCN(C(NC5=CC=CC(N)=N5)=O)CC4=O)[C@]2(C)[C@H](C)CC3            | 5.76 |
| O=C(CC1)[C@]2([H])[C@@]31[C@@H](C)[C@H](O)[C@](C)(C=C)C[C@@H](OC(CN4CCN(C(NC5=CC=CC(N)=C5)=O)CC4=O)[C@]2(C)[C@H](C)CC3            | 5.76 |
| O=C(CC1)[C@]2([H])[C@@]31[C@@H](C)[C@H](O)[C@](C)(C=C)C[C@@H](OC(CN4CCN(C(NC5=CC=CC(C)=O)CC4=O)[C@]2(C)[C@H](C)CC3                | 5.76 |
| O=C(CC1)[C@]2([H])[C@@]31[C@@H](C)[C@H](O)[C@](C)(C=C)C[C@@H](OC(CS(C4=NC5=C(C)C=CC=C5)=O)=O)[C@]2(C)[C@H](C)CC3                  | 5.76 |
| O=C1CC[C@]2(CC[C@H]3C)[C@]1([H])[C@]3(C)[C@H](OC(CN4CCN(C(CN5CCCC5)=O)CC4=O)C[C@@](C)(C=C)[C@@H](O)[C@@H]2C                       | 5.76 |
| O=C(CC1)[C@]2([H])[C@@]31[C@@H](C)[C@H](O)[C@](C)(C=C)C[C@@H](OC(CS(S(C4=NC(N)=CC(N)=N4)=O)=O)[C@]2(C)[C@H](C)CC3                 | 5.75 |
| O=C(CC1)[C@]2([H])[C@@]31[C@@H](C)[C@H](O)[C@](C)(C=C)C[C@@H](OC(CN4CCN(C(NC5=CC=CC=C5)=O)CC4=O)[C@]2                             |      |

|                                                                                                                                                          |      |
|----------------------------------------------------------------------------------------------------------------------------------------------------------|------|
| O=C(CC1)[C@2]([H])[C@@]31[C@@H](C)[C@H](O)[C@](C)(C=C)C[C@@H](OC(CN4CCN(C(/C=C/C5=CC([N+](O-))=O)=CC=C5)=O)CC4)=O)[C@2](C)[C@H](C)CC3                    | 5.70 |
| O=C(CC1)[C@2]([H])[C@@]31[C@@H](C)[C@H](O)[C@](C)(C=C)C[C@@H](OC(CNCCC4=CC=C(C)C=C4)=O)[C@2](C)[C@H](C)CC3                                               | 5.70 |
| O=C(CC1)[C@2]([H])[C@@]31[C@@H](C)[C@H](O)[C@](C)(C=C)C[C@@H](OC(CNCCC4=C(C)C=CC=C4)=O)[C@2](C)[C@H](C)CC3                                               | 5.70 |
| O=C(CC1)[C@2]([H])[C@@]31[C@@H](C)[C@H](O)[C@](C)(C=C)C[C@@H](OC(CNCCCC4=CC=CC=C4)=O)[C@2](C)[C@H](C)CC3                                                 | 5.70 |
| O=C(CC1)[C@2]([H])[C@@]31[C@@H](C)[C@H](O)[C@](C)(C=C)C[C@@H](OC(CSC4=NC(C=CC(NC(C5=CC=CN5)=O)=C6)=C6N4)=O)[C@2](C)[C@H](C)CC3                           | 5.69 |
| O=C(CC1)[C@2]([H])[C@@]31[C@@H](C)[C@H](O)[C@](C)(C=C)C[C@@H](OC(CSC4=CC=C(CO)N=C4)=O)[C@2](C)[C@H](C)CC3                                                | 5.69 |
| O=C(CC1)[C@2]([H])[C@@]31[C@@H](C)[C@H](O)[C@](C)(C=C)C[C@@H](OC(C[N+](4(CCCC(CO)C4)=O)[C@2](C)[C@H](C)CC3                                               | 5.69 |
| O=C(CC1)[C@2]([H])[C@@]31[C@@H](C)[C@H](O)[C@](C)(C=C)C[C@@H](OC(C[N+](4=CC=C(N)C=C4Cl)=O)[C@2](C)[C@H](C)CC3                                            | 5.69 |
| O=C(CC1)[C@2]([H])[C@@]31[C@@H](C)[C@H](O)[C@](C)(C=C)C[C@@H](OC(CSC4=CC(NC(CN5CCCC5)=O)=CN=C4)=O)[C@2](C)[C@H](C)CC3                                    | 5.69 |
| O=C(CC1)[C@2]([H])[C@@]31[C@@H](C)[C@H](O)[C@](C)(C=C)C[C@@H](OC(CN4CCN(C(/C=C/C5=CC=C(C)C=C5)=O)CC4)=O)[C@2](C)[C@H](C)CC3                              | 5.69 |
| O=C(CC1)[C@2]([H])[C@@]31[C@@H](C)[C@H](O)[C@](C)(C=C)C[C@@H](OC(CNCC4=CC=CC=C4F)=O)[C@2](C)[C@H](C)CC3                                                  | 5.69 |
| O=C(CC1)[C@2]([H])[C@@]31[C@@H](C)[C@H](O)[C@](C)(C=C)C[C@@H](OC(CNCC4=CC=CC(F)=C4)=O)[C@2](C)[C@H](C)CC3                                                | 5.69 |
| O=C(CC1)[C@2]([H])[C@@]31[C@@H](C)[C@H](O)[C@](C)(C=C)C[C@@H](OC(CNCCS(=O)(C)=O)=O)[C@2](C)[C@H](C)CC3                                                   | 5.68 |
| O=C(CC1)[C@2]([H])[C@@]31[C@@H](C)[C@H](O)[C@](C)(C=C)C[C@@H](OC(CNCCC4=CC=NC=C4)=O)[C@2](C)[C@H](C)CC3                                                  | 5.68 |
| O=C(CC1)[C@2]([H])[C@@]31[C@@H](C)[C@H](O)[C@](C)(C=C)C[C@@H](OC(CNCCC4=CC=CC=C4)=O)[C@2](C)[C@H](C)CC3                                                  | 5.68 |
| O=C(CC1)[C@2]([H])[C@@]31[C@@H](C)[C@H](O)[C@](C)(C=C)C[C@@H](OC(CSC4=CC(C(O)=C(CN5CCCC5)O4)=O)=O)[C@2](C)[C@H](C)CC3                                    | 5.68 |
| O=C(CC1)[C@2]([H])[C@@]31[C@@H](C)[C@H](O)[C@](C)(C=C)C[C@@H](OC(C[N+](4=C(CCC5)C5=CC=C4)=O)[C@2](C)[C@H](C)CC3                                          | 5.68 |
| O=C(CC1)[C@2]([H])[C@@]31[C@@H](C)[C@H](O)[C@](C)(C=C)C[C@@H](OC(CSC4=NC(N)=NN4)=O)[C@2](C)[C@H](C)CC3                                                   | 5.68 |
| O=C(CC1)[C@2]([H])[C@@]31[C@@H](C)[C@H](O)[C@](C)(C=C)C[C@@H](OC(CSC4=CC=C(N)N=C4)=O)[C@2](C)[C@H](C)CC3                                                 | 5.67 |
| O=C1CC[C@2](CC[C@H]3C)[C@1]([H])[C@]3(C)[C@H](OC(CSC4=NC(N(C)CC)=CC(C)=N4)=O)C[C@@](C)(C=C)[C@@H](O)[C@@H]2C                                             | 6.09 |
| O=C(CC1)[C@2]([H])[C@@]31[C@@H](C)[C@H](O)[C@](C)(C=C)C[C@@H](OC(CN4CCSCC4)=O)[C@2](C)[C@H](C)CC3                                                        | 5.67 |
| O=C(CC1)[C@2]([H])[C@@]31[C@@H](C)[C@H](O)[C@](C)(C=C)C[C@@H](OC(CNCCSC)=O)[C@2](C)[C@H](C)CC3                                                           | 5.65 |
| O=C(CC1)[C@2]([H])[C@@]31[C@@H](C)[C@H](O)[C@](C)(C=C)C[C@@H](OC(CN4CCOCC4)=O)[C@2](C)[C@H](C)CC3                                                        | 5.65 |
| O=C(CC1)[C@2]([H])[C@@]31[C@@H](C)[C@H](O)[C@](C)(C=C)C[C@@H](OC(CN4CCNCC4)=O)[C@2](C)[C@H](C)CC3                                                        | 5.65 |
| O=C(CC1)[C@2]([H])[C@@]31[C@@H](C)[C@H](O)[C@](C)(C=C)C[C@@H](OC(C[N+](4=CC=CC=C4)=O)[C@2](C)[C@H](C)CC3                                                 | 5.64 |
| O=C(CC1)[C@2]([H])[C@@]31[C@@H](C)[C@H](O)[C@](C)(C=C)C[C@@H](OC(CN4CCN(C(/C=C/C5=CC=CC=C5Br)=O)CC4)=O)[C@2](C)[C@H](C)CC3                               | 5.64 |
| O=C(CC1)[C@2]([H])[C@@]31[C@@H](C)[C@H](O)[C@](C)(C=C)C[C@@H](OC(CN4CCN(C(/C=C/C5=CC=C(Br)C=C5)=O)CC4)=O)[C@2](C)[C@H](C)CC3                             | 5.64 |
| O=C(CC1)[C@2]([H])[C@@]31[C@@H](C)[C@H](O)[C@](C)(C=C)C[C@@H](OC(CN4CCN(C(/C=C/C5=CC=C(C(F)(F)F)C=C5)=O)CC4)=O)[C@2](C)[C@H](C)CC3                       | 5.63 |
| O=C(CC1)[C@2]([H])[C@@]31[C@@H](C)[C@H](O)[C@](C)(C=C)C[C@@H](OC(CNCCO)=O)[C@2](C)[C@H](C)CC3                                                            | 5.62 |
| O=C(CC1)[C@2]([H])[C@@]31[C@@H](C)[C@H](O)[C@](C)(C=C)C[C@@H](OC(CSC4=CC=C([N+](O-))C=N4)=O)[C@2](C)[C@H](C)CC3                                          | 5.62 |
| O=C(CC1)[C@2]([H])[C@@]31[C@@H](C)[C@H](O)[C@](C)(C=C)C[C@@H](OC(CSC4=C(NC(CN5N=NC(CN6CCN(C7=CC=CC(C1)=C7)CC6)=C5)=O)C=CC=C4)=O)[C@2](C)[C@H](C)CC3      | 5.60 |
| O=C(CC1)[C@2]([H])[C@@]31[C@@H](C)[C@H](O)[C@](C)(C=C)C[C@@H](OC(CSC4=C(C#N)C=CC=N4)=O)[C@2](C)[C@H](C)CC3                                               | 5.60 |
| O=C(CC1)[C@2]([H])[C@@]31[C@@H](C)[C@H](O)[C@](C)(C=C)C[C@@H](OC(CSC4=C(NC(CN5N=NC(CN6CCN(C7=CC=C(O)C=C7)CC6)=C5)=O)C=CC=C4)=O)[C@2](C)[C@H](C)CC3       | 5.59 |
| O=C(CC1)[C@2]([H])[C@@]31[C@@H](C)[C@H](O)[C@](C)(C=C)C[C@@H](OC(CSC4CCN(C(CCN5C=NC6=C5N=C(N)N=C6N7CCC(N)CC7)=O)CC4)=O)[C@2](C)[C@H](C)CC3               | 5.59 |
| O=C(CC1)[C@2]([H])[C@@]31[C@@H](C)[C@H](O)[C@](C)(C=C)C[C@@H](OC(CN4CCN(C(CN5N=NC(CN6CCN(C7=CC=CC=C7[N+](O-))=O)CC6)=C5)=O)CC4)=O)[C@2](C)[C@H](C)CC3    | 5.59 |
| O=C(CC1)[C@2]([H])[C@@]31[C@@H](C)[C@H](O)[C@](C)(C=C)C[C@@H](OC(CN4CCN(C(CN5N=NC(CN6CCN(C7=CC=CC([N+](O-))=O)=C7)CC6)=C5)=O)C=C4)=O)[C@2](C)[C@H](C)CC3 | 5.59 |
| O=C(CC1)[C@2]([H])[C@@]31[C@@H](C)[C@H](O)[C@](C)(C)C[C@@H](OC(CS(C(CC4)CCN4C(CCN5C=NC6=C5N=CN=C6N7CCC(C7)N)=O)(=O)=O)[C@2](C)[C@H](C)CC3                | 5.59 |
| O=C(CC1)[C@2]([H])[C@@]31[C@@H](C)[C@H](O)[C@](C)(C=C)C[C@@H](OC(CSCC(C4)OCCN4C(CCN5C=NC6=C5N=C(N)N=C6N7CCNCC7)=O)=O)[C@2](C)[C@H](C)CC3                 | 5.58 |
| O=C(CC1)[C@2]([H])[C@@]31[C@@H](C)[C@H](O)[C@](C)(C=C)C[C@@H](OC(CSC4CCN(C(CCN5C=NC6=C5N=C(N)N=C6N7CC(CN)CC7)=O)CC4)=O)[C@2](C)[C@H](C)CC3               | 5.58 |
| O=C(CC1)[C@2]([H])[C@@]31[C@@H](C)[C@H](O)[C@](C)(C=C)C[C@@H](OC(CN4CCN(C(CN5N=NC(CN6CCN(C7=C(C)C=CC=C7)CC6)=C5)=O)CC4)=O)[C@2](C)[C@H](C)CC3            | 5.57 |
| O=C(CC1)[C@2]([H])[C@@]31[C@@H](C)[C@H](O)[C@](C)(C=C)C[C@@H](OC(CS[C@@H](C4)CCN4C(CCN5C=NC6=C5N=C(N)N=C6N7CCNCC7)=O)=O)[C@2](C)[C@H](C)CC3              | 5.57 |
| O=C1CC[C@2](CC[C@H]3C)[C@1]([H])[C@]3(C)[C@H](OC(CN4CCN(C(C(C5=NCN6=C5C=CC=C6)NC(OC(C)(C)C)=O)CC4)=O)C[C@@](C)(C=C)[C@@H](O)[C@@H]2C                     | 5.56 |
| O=C(CC1)[C@2]([H])[C@@]31[C@@H](C)[C@H](O)[C@](C)(C=C)C[C@@H](OC(CSC4=C(NC(CN5CCN(C6=CC=C([N+](O-))=O)C=C6)CC5)=O)C=CC=C4)=O)[C@2](C)[C@H](C)CC3         | 5.56 |
| O=C1CC[C@2](CC[C@H]3C)[C@1]([H])[C@]3(C)[C@H](OC(CSC4=NC(NC=C5)=C5C(NC(CN6CCC(C7=CC=CC=C7)CC6)=O)=N4)=O)C[C@@](C)(C=C)[C@@H](O)[C@@H]2C                  | 5.56 |
| O=C(CC1)[C@2]([H])[C@@]31[C@@H](C)[C@H](O)[C@](C)(C=C)C[C@@H](OC(CSC(C4)CN4C(CCN5C=NC6=C5N=C(N)N=C6N7CCNCC7)=O)=O)[C@2](C)[C@H](C)CC3                    | 5.56 |
| O=C(CC1)[C@2]([H])[C@@]31[C@@H](C)[C@H](O)[C@](C)(C=C)C[C@@H](OC(CNC(CC4)CCN4C(CCN5C=NC6=C5N=CN=C6N7CCC(C7)N)=O)=O)[C@2](C)[C@H](C)CC3                   | 5.56 |
| O=C(CC1)[C@2]([H])[C@@]31[C@@H](C)[C@H](O)[C@](C)(C=C)C[C@@H](OC(CSC4=C(NC(CN5CCN(C6=CC=C(OC)C=C6)CC5)=O)C=CC=C4)=O)[C@2](C)[C@H](C)CC3                  | 5.56 |
| O=C(CC1)[C@2]([H])[C@@]31[C@@H](C)[C@H](O)[C@](C)(C=C)C[C@@H](OC(CN4CCN(C5=CC=C(C6CC(C7=CC=CC=C7[N+](O-))=O)=NN6)C=C5)CC4)=O)[C@2](C)[C@H](C)CC3         | 5.55 |
| O=C(CC1)[C@2]([H])[C@@]31[C@@H](C)[C@H](O)[C@](C)(C=C)C[C@@H](OC(CSC4=C(NC(CN5CCN(C6=CC=CC=C6F)CC5)=O)C=CC=C4)=O)[C@2](C)[C@H](C)CC3                     | 5.55 |
| O=C(CC1)[C@2]([H])[C@@]31[C@@H](C)[C@H](O)[C@](C)(C=C)C[C@@H](OC(CSC4=C(NC(CN5CCN(C6=C(C)C=CC=C6)CC5)=O)C=CC=C4)=O)[C@2](C)[C@H](C)CC3                   | 5.55 |

|                                                                                                                                            |      |
|--------------------------------------------------------------------------------------------------------------------------------------------|------|
| O=C(N(CC1)CCN1CC(O[C@@H]([C@]2(C)[C@H](C)CC3)C[C@@](C)(C=C)[C@@H](O)[C@H](C)[C@@]43[C@@]2([H])C(CC4)=O)=O)[C@H](CC5=CC=CC=C5)NC(OC(C)C)C=O | 5.54 |
| O=C(CC1)[C@]2([H])[C@@]31[C@@H](C)[C@H](O)[C@](C)(C=C)C[C@@H](OC(CN4N=NC(C5=CC=CC(C6=CC=CC(CN(CC)CC)=C6)=C5)=C4)=O)[C@]2(C)[C@H](C)CC3     | 5.53 |
| O=C1CC[C@]2(CC[C@H]3C)[C@]1([H])[C@]3(C)[C@H](OC(CN4CCN(C(NC5=CC=CC(NC(OC(C)(C)C)=O)C5)=O)CC4)=O)C[C@@](C)(C=C)[C@@H](O)[C@@H]2C           | 5.53 |
| O=C(CC1)[C@]2([H])[C@@]31[C@@H](C)[C@H](O)[C@](C)(C=C)C[C@@H](OC(N4CC5=C(C=CC=C5OCCCN6C=NC(C7=CC=CN=C7)=C6)C4=O)=O)[C@]2(C)[C@H](C)CC3     | 5.53 |
| O=C(CC1)[C@]2([H])[C@@]31[C@@H](C)[C@H](O)[C@](C)(C=C)C[C@@H](OC(N4C(C(C=C(NC(CCN5CCN(CCO)CC5)=O)C=C6)=C6C4)=O)=O)[C@]2(C)[C@H](C)CC3      | 5.53 |
| O=C(CC1)[C@]2([H])[C@@]31[C@@H](C)[C@H](O)[C@](C)(C=C)C[C@@H](OC(CN4CCN(C(CN5CCN(C6=CC=C(O)C=C6)CC5)=O)CC4)=O)[C@]2(C)[C@H](C)CC3          | 5.52 |
| CC1C23C(C(CC3)=O)C(C(CC(C=C)(C)C1O)OC(CN4CCN(C(CN5CCN(C6=CC=C(O)C=C6)CC5)=O)CC4)=O)(C(CC2)C)C                                              | 5.52 |
| O=C(CC1)[C@]2([H])[C@@]31[C@@H](C)[C@H](O)[C@](C)(C=C)C[C@@H](OC(CN4N=NC(CN5CCN(C6=CC=CC([N+])([O-])=O)=C6)CC5)=C4)=O)[C@]2(C)[C@H](C)CC3  | 5.51 |
| O=C(CC1)[C@]2([H])[C@@]31[C@@H](C)[C@H](O)[C@](C)(C=C)C[C@@H](OC(CSC4=NN(C(C5=CC=CC=C5C(F)(F)F)=O)C(N)=N4)=O)[C@]2(C)[C@H](C)CC3           | 5.51 |
| O=C1CC[C@]2(CC[C@H]3C)[C@]1([H])[C@]3(C)[C@H](OC(CN4CCN(C([C@H]([C@@H](C)O)NC(OC(C)(C)C)=O)CC4)=O)C[C@@](C)(C=C)[C@@H](O)[C@@H]2C          | 5.51 |
| O=C(CC1)[C@]2([H])[C@@]31[C@@H](C)[C@H](O)[C@](C)(C=C)C[C@@H](OC(CSC4=NN=C(C)N4/N=C/C5=CC=CC(C(F)(F)F)=C5)=O)[C@]2(C)[C@H](C)CC3           | 5.51 |
| O=C(CC1)[C@]2([H])[C@@]31[C@@H](C)[C@H](O)[C@](C)(C=C)C[C@@H](OC(CSC4=NN=C(C)N4/N=C/C5=CC=CC(C(F)(F)F)C=C5)=O)[C@]2(C)[C@H](C)CC3          | 5.51 |
| O=C(N(CC1)CCN1CC(O[C@@H]([C@]2(C)[C@H](C)CC3)C[C@@](C)(C=C)[C@@H](O)[C@H](C)[C@@]43[C@@]2([H])C(CC4)=O)=O)[C@H](C(C)C)NC(OC(C)(C)C)=O      | 5.51 |
| O=C1CC[C@]2(CC[C@H]3C)[C@]1([H])[C@]3(C)[C@H](OC(CN4CCN(C(NC5=CC=CC(C(F)(F)F)=C5)=O)CC4)=O)C[C@@](C)(C=C)[C@@H](O)[C@@H]2C                 | 5.50 |
| O=C(CC1)[C@]2([H])[C@@]31[C@@H](C)[C@H](O)[C@](C)(C=C)C[C@@H](OC(CSC4=NN=C(NC(C5=CC=CC(C5C1)=O)S4)=O)[C@]2(C)[C@H](C)CC3                   | 5.50 |
| O=C(CC1)[C@]2([H])[C@@]31[C@@H](C)[C@H](O)[C@](C)(C=C)C[C@@H](OC(CSC4=NN=C(NC(C5=CC=CC(COC)C=C5)=O)S4)=O)[C@]2(C)[C@H](C)CC3               | 5.50 |
| O=C(CC1)[C@]2([H])[C@@]31[C@@H](C)[C@H](O)[C@](C)(C=C)C[C@@H](OC(CN4N=NC(C5=CC=CC=C5CC6=CC=C(OC)C=C6)=C4)=O)[C@]2(C)[C@H](C)CC3            | 5.50 |
| O=C1CC[C@]2(CC[C@H]3C)[C@]1([H])[C@]3(C)[C@H](OC(CSC4=NC(OC(CCC)=CC(C)=N4)=O)C[C@@](C)(C=C)[C@@H](O)[C@@H]2C                               | 5.49 |
| O=C(CC1)[C@]2([H])[C@@]31[C@@H](C)[C@H](O)[C@](C)(C=C)C[C@@H](OC(CN4CCN(C(NCCC5=CC=CC(OC)=C5)=O)CC4)=O)[C@]2(C)[C@H](C)CC3                 | 5.49 |
| O=C(CC1)[C@]2([H])[C@@]31[C@@H](C)[C@H](O)[C@](C)(C=C)C[C@@H](OC(CN4CCN(C(CNCC5=CC=CC(C)C)=O)CC4)=O)[C@]2(C)[C@H](C)CC3                    | 5.49 |
| O=C(CC1)[C@]2([H])[C@@]31[C@@H](C)[C@H](O)[C@](C)(C=C)C[C@@H](OC(CN4N=NC(CN5CCN(C6=CC=CC=C6F)CC5)=O)CC4)=O)[C@]2(C)[C@H](C)CC3             | 5.49 |
| O=C(CC1)[C@]2([H])[C@@]31[C@@H](C)[C@H](O)[C@](C)(C=C)C[C@@H](OC(CN4N=NC(C5=CC=CC(CN6CCN(C)CC6)=C5)=C4)=O)[C@]2(C)[C@H](C)CC3              | 5.49 |
| O=C1CC[C@]2(CC[C@H]3C)[C@]1([H])[C@]3(C)[C@H](OC(CN4CCN(C(NC5=C(C=CC=N6)C6=CC=C5)=O)CC4)=O)C[C@@](C)(C=C)[C@@H](O)[C@@H]2C                 | 5.49 |
| O=C(CC1)[C@]2([H])[C@@]31[C@@H](C)[C@H](O)[C@](C)(C=C)C[C@@H](OC(CSC4=NN=C(NC(C5=CC=CC(CN)C=C5)=O)S4)=O)[C@]2(C)[C@H](C)CC3                | 5.49 |
| O=C1CC[C@]2(CC[C@H]3C)[C@]1([H])[C@]3(C)[C@H](OC(CN4CCN(C(NC5=CC=C([N+])([O-])O)C=C5)=O)CC4)=O)C[C@@](C)(C=C)[C@@H](O)[C@@H]2C             | 5.48 |
| O=C1CC[C@]2(CC[C@H]3C)[C@]1([H])[C@]3(C)[C@H](OC(CN4CCN(C(NCC5=CC=C(OC)C=C5)=O)CC4)=O)C[C@@](C)(C=C)[C@@H](O)[C@@H]2C                      | 5.48 |
| O=C(CC1)[C@]2([H])[C@@]31[C@@H](C)[C@H](O)[C@](C)(C=C)C[C@@H](OC(CSC(C)(O)CNC(C4=CC(C=CC=C5)=C5N4)=O)=O)[C@]2(C)[C@H](C)CC3                | 5.48 |
| O=C(CC1)[C@]2([H])[C@@]31[C@@H](C)[C@H](O)[C@](C)(C=C)C[C@@H](OC(CSC(C)(O)CNC(CN(CCC)CCO)=O)=O)[C@]2(C)[C@H](C)CC3                         | 5.48 |
| O=C(CC1)[C@]2([H])[C@@]31[C@@H](C)[C@H](O)[C@](C)(C=C)C[C@@H](OC(C5(S(C4=NC5=C(C=CC(OC)=C5)N4)=O)=O)=O)[C@]2(C)[C@H](C)CC3                 | 5.48 |
| O=C(CC1)[C@]2([H])[C@@]31[C@@H](C)[C@H](O)[C@](C)(C=C)C[C@@H](OC(CN4N=NC(CCCN5C(N=CN=C6N)=C6N=C5)=C4)=O)[C@]2(C)[C@H](C)CC3                | 5.48 |
| O=C(CC1)[C@]2([H])[C@@]31[C@@H](C)[C@H](O)[C@](C)(C=C)C[C@@H](OC(CN4CCN(C(NCCN5CCOCC5)=O)CC4)=O)[C@]2(C)[C@H](C)CC3                        | 5.48 |
| O=C(CC1)[C@]2([H])[C@@]31[C@@H](C)[C@H](O)[C@](C)(C=C)C[C@@H](OC(CN4CCN(C(NCC5=CC=C(C)C)=O)CC4)=O)[C@]2(C)[C@H](C)CC3                      | 5.48 |
| O=C1CC[C@]2(CC[C@H]3C)[C@]1([H])[C@]3(C)[C@H](OC(CSC4=NC(O)=CC(NC([C@H](C)C(C)C)=O)N4)=O)C[C@@](C)(C=C)[C@@H](O)[C@@H]2C                   | 5.48 |
| O=C(CC1)[C@]2([H])[C@@]31[C@@H](C)[C@H](O)[C@](C)(C=C)C[C@@H](OC(CSC(C)(O)CNC(C4=CC(OC)=CC=C4)=O)=O)[C@]2(C)[C@H](C)CC3                    | 5.48 |
| O=C(CC1)[C@]2([H])[C@@]31[C@@H](C)[C@H](O)[C@](C)(C=C)C[C@@H](OC(CSC(C)(O)CNC([C@@H](C)C4=CC=CC=C4)=O)=O)[C@]2(C)[C@H](C)CC3               | 5.48 |
| O=C1CC[C@]2(CC[C@H]3C)[C@]1([H])[C@]3(C)[C@H](OC(CN4CCN(C(NC5=CC=C(OC)C=C5)=O)CC4)=O)C[C@@](C)(C=C)[C@@H](O)[C@@H]2C                       | 5.47 |
| O=C(CC1)[C@]2([H])[C@@]31[C@@H](C)[C@H](O)[C@](C)(C=C)C[C@@H](OC(CN4CCN(C(NCC5=CC=C(C)C=C5)=O)CC4)=O)[C@]2(C)[C@H](C)CC3                   | 5.47 |
| O=C1CC[C@]2(CC[C@H]3C)[C@]1([H])[C@]3(C)[C@H](OC(CN4CCN(C(OC(CN5=CC=C(C)C=C5)=O)CC4)=O)C[C@@](C)(C=C)[C@@H](O)[C@@H]2C                     | 5.47 |
| O=C(CC1)[C@]2([H])[C@@]31[C@@H](C)[C@H](O)[C@](C)(C=C)C[C@@H](OC(CSC(C)(O)CNC(CN4CCCCC4)=O)=O)[C@]2(C)[C@H](C)CC3                          | 5.47 |
| O=C(CC1)[C@]2([H])[C@@]31[C@@H](C)[C@H](O)[C@](C)(C=C)C[C@@H](OC(CN4N=NC(C5=CC=CC(CN(CC)CC)=C5)=C4)=O)[C@]2(C)[C@H](C)CC3                  | 5.47 |
| O=C(CC1)[C@]2([H])[C@@]31[C@@H](C)[C@H](O)[C@](C)(C=C)C[C@@H](OC(CN4CCN(C(C=C(C)C)C=CC=C5)=O)CC4)=O)[C@]2(C)[C@H](C)CC3                    | 5.47 |
| O=C(CC1)[C@]2([H])[C@@]31[C@@H](C)[C@H](O)[C@](C)(C=C)C[C@@H](OC(N4C(C(C=CC(NC(C(F)(F)F)=O)C5)=C5C4)=O)=O)[C@]2(C)[C@H](C)CC3              | 5.47 |
| O=C(CC1)[C@]2([H])[C@@]31[C@@H](C)[C@H](O)[C@](C)(C=C)C[C@@H](OC(CSC(C)(O)CNC(C4=CC(N)=CC=C4)=O)=O)[C@]2(C)[C@H](C)CC3                     | 5.47 |
| O=C(CC1)[C@]2([H])[C@@]31[C@@H](C)[C@H](O)[C@](C)(C=C)C[C@@H](OC(N4C(C(C=CC(NCC5=CC=CC=C5)=C6)=C6C4)=O)=O)[C@]2(C)[C@H](C)CC3              | 5.47 |
| O=C(CC1)[C@]2([H])[C@@]31[C@@H](C)[C@H](O)[C@](C)(C=C)C[C@@H](OC(C5(SC4=NN=NN4CCN(C)C)=O)=O)[C@]2(C)[C@H](C)CC3                            | 5.46 |
| O=C(CC1)[C@]2([H])[C@@]31[C@@H](C)[C@H](O)[C@](C)(C=C)C[C@@H](OC(CN4CCN(C(N(C)C5=CC=CC=C5)=O)CC4)=O)[C@]2(C)[C@H](C)CC3                    | 5.46 |
| O=C1CC[C@]2(CC[C@H]3C)[C@]1([H])[C@]3(C)[C@H](OC(CN4CCN(C([C@H](CCSC)N)=O)CC4)=O)C[C@@](C)(C=C)[C@@H](O)[C@@H]2C                           | 5.46 |
| O=C(CC1)[C@]2([H])[C@@]31[C@@H](C)[C@H](O)[C@](C)(C=C)C[C@@H](OC(C5(S(C4=NC5=C(C=CC=C5)O4)=O)=O)=O)[C@]2(C)[C@H](C)CC3                     | 5.46 |
| O=C1CC[C@]2(CC[C@H]3C)[C@]1([H])[C@]3(C)[C@H](OC(CN4CCN(C(CN5CCOCC5)=O)CC4)=O)C[C@@](C)(C=C)[C@@H](O)[C@@H]2C                              | 5.46 |
| O=C(CC1)[C@]2([H])[C@@]31[C@@H](C)[C@H](O)[C@](C)(C=C)C[C@@H](OC(CSC(C)(O)CNC(OC(C)C)=O)=O)[C@]2(C)[C@H](C)CC3                             | 5.45 |
| O=C1CC[C@]2(CC[C@H]3C)[C@]1([H])[C@]3(C)[C@H](OC(CN4CCN(C(NC5=CC=CC=C5)=O)CC4)=O)C[C@@](C)(C=C)[C@@H](O)[C@@H]2C                           | 5.45 |
| O=C1CC[C@]2(CC[C@H]3C)[C@]1([H])[C@]3(C)[C@H](OC(CSC4=NC(OC(C)C)=CC(C)=N4)=O)C[C@@](C)(C=C)[C@@H](O)[C@@H]2C                               | 6.07 |
| O=C(CC1)[C@]2([H])[C@@]31[C@@H](C)[C@H](O)[C@](C)(C=C)C[C@@H](OC(CSC(C)(O)CNC(CNC(C)C)=O)=O)[C@]2(C)[C@H](C)CC3                            | 5.45 |
| O=C(CC1)[C@]2([H])[C@@]31[C@@H](C)[C@H](O)[C@](C)(C=C)C[C@@H](OC(N4C(C(C=CC(N5CCCCC5)=C6)=C6C4)=O)=O)[C@]2(C)[C@H](C)CC3                   | 5.45 |
| O=C1CC[C@]2(CC[C@H]3C)[C@]1([H])[C@]3(C)[C@H](OC(CN4CCN(C5=CC=CC=C5C1)CC4)=O)C[C@@](C)(C=C)[C@@H](O)[C@@H]2C                               | 5.44 |
| O=C1CC[C@]2(CC[C@H]3C)[C@]1([H])[C@]3(C)[C@H](OC(CN4CCN(C5=CC=C(C)C=C5)CC4)=O)C[C@@](C)(C=C)[C@@H](O)[C@@H]2C                              | 5.44 |
| O=C(CC1)[C@]2([H])[C@@]31[C@@H](C)[C@H](O)[C@](C)(C=C)C[C@@H](OC(C5(S(C4=NN=CS4)=O)=O)=O)[C@]2(C)[C@H](C)CC3                               | 5.43 |
| O=C(CC1)[C@]2([H])[C@@]31[C@@H](C)[C@H](O)[C@](C)(C=C)C[C@@H](OC(CSC4=NN=C(C5=CC=CC=C5)O4)=O)[C@]2(C)[C@H](C)CC3                           | 5.43 |
| O=C(CC1)[C@]2([H])[C@@]31[C@@H](C)[C@H](O)[C@](C)(C=C)C[C@@H](OC(CN4N=NC(C5=CC=CC(CN)=C5)=C4)=O)[C@]2(C)[C@H](C)CC3                        | 5.43 |
| O=C(CC1)[C@]2([H])[C@@]31[C@@H](C)[C@H](O)[C@](C)(C=C)C[C@@H](OC(CN4N=NC(C5=CC=C(CN)C=C5)=C4)=O)[C@]2(C)[C@H](C)CC3                        | 5.43 |
| O=C(CC1)[C@]2([H])[C@@]31[C@@H](C)[C@H](O)[C@](C)(C=C)C[C@@H](OC(C5(SC4=NN=NN4C)=O)=O)[C@]2(C)[C@H](C)CC3                                  | 5.42 |



|                                                                                                                                                      |      |
|------------------------------------------------------------------------------------------------------------------------------------------------------|------|
| O=C(CC1)[C@2]([H])[C@@31[C@@H](C)[C@H](O)[C@](C)(C=C)C[C@@H](OC(N(CC4)C(C5=C4C=C(OC)C=C5)=O)=O)[C@2(C)[C@H](C)CC3                                    | 5.42 |
| O=C1CC[C@2](CC[C@H]3C)[C@1]([H])[C@3(C)[C@H](OC(CN4CCN(C([C@H](C)N)=O)CC4)=O)C[C@@](C)(C=C)[C@@H](O)[C@@H]2C                                         | 5.41 |
| O=C1CC[C@2](CC[C@H]3C)[C@1]([H])[C@3(C)[C@H](OC(CSC4=NC(N)=CC(N4C)=O)=O)C[C@@](C)(C=C)[C@@H](O)[C@@H]2C                                              | 5.41 |
| O=C(CC1)[C@2]([H])[C@@31[C@@H](C)[C@H](O)[C@](C)(C=C)C[C@@H](OC(CSC(N4C)=NC(N)=CC4=O)=O)[C@2(C)[C@H](C)CC3                                           | 5.41 |
| O=C(CC1)[C@2]([H])[C@@31[C@@H](C)[C@H](O)[C@](C)(C=C)C[C@@H](OC(N4C(C(C=CC=C5OC)=C5C4)=O)=O)[C@2(C)[C@H](C)CC3                                       | 5.41 |
| O=C(CC1)[C@2]([H])[C@@31[C@@H](C)[C@H](O)[C@](C)(C=C)C[C@@H](OC(CN4N=NC(C5=CC=CC=C5)=C4)=O)[C@2(C)[C@H](C)CC3                                        | 5.40 |
| O=C1CC[C@2](CC[C@H]3C)[C@1]([H])[C@3(C)[C@H](OC(CN4CCN(C(CN)=O)CC4)=O)C[C@@](C)(C=C)[C@@H](O)[C@@H]2C                                                | 5.40 |
| O=C(CC1)[C@2]([H])[C@@31[C@@H](C)[C@H](O)[C@](C)(C=C)C[C@@H](OC(CNCCC4=CC=C(O)C=C4)=O)[C@2(C)[C@H](C)CC3                                             | 5.40 |
| O=C(CC1)[C@2]([H])[C@@31[C@@H](C)[C@H](O)[C@](C)(C=C)C[C@@H](OC(CN4CCN(C)CC4)=O)[C@2(C)[C@H](C)CC3                                                   | 5.36 |
| O=C1CC[C@2](CC[C@H]3C)[C@1]([H])[C@3(C)[C@H](OC(CN4CCN(C)CC4)=O)C[C@@](C)(C=C)[C@@H](O)[C@@H]2C                                                      | 5.36 |
| CC1C23C(C(CC3)=O)C(C(CC(C=C)(C)C1O)OC(CN4CCNCCC4)=O)(C(CC2)C)C                                                                                       | 5.35 |
| O=C(CC1)[C@2]([H])[C@@31[C@@H](C)[C@H](O)[C@](C)(C=C)C[C@@H](OC(C1N+)=CN(C)C=C4)=O)[C@2(C)[C@H](C)CC3                                                | 5.35 |
| O=C(CC1)[C@2]([H])[C@@31[C@@H](C)[C@H](O)[C@](C)(C=C)C[C@@H](OC(CNCC(C)C)=O)[C@2(C)[C@H](C)CC3                                                       | 5.34 |
| O=C(CC1)[C@2]([H])[C@@31[C@@H](C)[C@H](O)[C@](C)(C=C)C[C@@H](OC(CNCCCC)=O)[C@2(C)[C@H](C)CC3                                                         | 5.34 |
| O=C(CC1)[C@2]([H])[C@@31[C@@H](C)[C@H](O)[C@](C)(C=C)C[C@@H](OC(CN4CCCC4)=O)[C@2(C)[C@H](C)CC3                                                       | 5.33 |
| O=C(CC1)[C@2]([H])[C@@31[C@@H](C)[C@H](O)[C@](C)(C=C)C[C@@H](OC(CN4CCN(C)/C=C/C5=CC=C(OC)C=C5)=O)CC4)=O)[C@2(C)[C@H](C)CC3                           | 5.31 |
| O=C(CC1)[C@2]([H])[C@@31[C@@H](C)[C@H](O)[C@](C)(C=C)C[C@@H](OC(CSC4CCN(C(CCN5C=NC6=C5N=C(N)N=C6N7CC(CNC)CC7)=O)CC4)=O)[C@2(C)[C@H](C)CC3            | 5.29 |
| O=C(CC1)[C@2]([H])[C@@31[C@@H](C)[C@H](O)[C@](C)(C=C)C[C@@H](OC(CN4CCN(C)/C=C/C5=CC=CC=C5)=O)CC4)=O)[C@2(C)[C@H](C)CC3                               | 5.28 |
| O=C(CC1)[C@2]([H])[C@@31[C@@H](C)[C@H](O)[C@](C)(C=C)C[C@@H](OC(CN4CCN(C(CN5N=NC(CN6CCN(C7=CC=CC=C7O)CC6)=C5)=O)CC4)=O)[C@2(C)[C@H](C)CC3            | 5.28 |
| O=C(CC1)[C@2]([H])[C@@31[C@@H](C)[C@H](O)[C@](C)(C=C)C[C@@H](OC(CN4CCN(C(CN5N=NC(CN6CCN(C7=CC=CC(OC)=C7)CC6)=C5)=O)CC4)=O)[C@2(C)[C@H](C)CC3         | 5.28 |
| O=C(CC1)[C@2]([H])[C@@31[C@@H](C)[C@H](O)[C@](C)(C=C)C[C@@H](OC(CN4CCN(C(CN5N=NC(CN6CCN(C7=CC=CC(F)=C7)CC6)=C5)=O)CC4)=O)[C@2(C)[C@H](C)CC3          | 5.27 |
| O=C(CC1)[C@2]([H])[C@@31[C@@H](C)[C@H](O)[C@](C)(C=C)C[C@@H](OC(CN4CCN(C(CN5N=NC(CN6CCN(C7=CC=C(F)=C7)CC6)=C5)=O)CC4)=O)[C@2(C)[C@H](C)CC3           | 5.27 |
| O=C(CC1)[C@2]([H])[C@@31[C@@H](C)[C@H](O)[C@](C)(C=C)C[C@@H](OC(CN4CCN(C(CN5N=NC(CN6CCN(C7=CC=CC(O)=C7)CC6)=C5)=O)CC4)=O)[C@2(C)[C@H](C)CC3          | 5.27 |
| O=C(CC1)[C@2]([H])[C@@31[C@@H](C)[C@H](O)[C@](C)(C=C)C[C@@H](OC(CN4CCN(C(CN5N=NC(CN6CCN(C7=CC(C)=CC=C7)CC6)=C5)=O)CC4)=O)[C@2(C)[C@H](C)CC3          | 5.27 |
| O=C(CC1)[C@2]([H])[C@@31[C@@H](C)[C@H](O)[C@](C)(C=C)C[C@@H](OC(CSC4=C(NC(CN5CCN(C6=C([N+])([O-])=O)C=CC=C6)CC5)=O)C=CC=C4)=O)[C@2(C)[C@H](C)CC3     | 5.26 |
| O=C(CC1)[C@2]([H])[C@@31[C@@H](C)[C@H](O)[C@](C)(C=C)C[C@@H](OC(CSC4=C(NC(CN5CCN(C6=CC=CC([N+])([O-])=O)C=CC=C6)CC5)=O)C=CC=C4)=O)[C@2(C)[C@H](C)CC3 | 5.26 |
| O=C(CC1)[C@2]([H])[C@@31[C@@H](C)[C@H](O)[C@](C)(C=C)C[C@@H](OC(CSC4=C(NC(CN5CCN(C6=CC=CC([N+])([O-])=O)C=CC=C6)CC5)=O)C=CC=C4)=O)[C@2(C)[C@H](C)CC3 | 5.26 |
| O=C(CC1)[C@2]([H])[C@@31[C@@H](C)[C@H](O)[C@](C)(C=C)C[C@@H](OC(CN4CCN(C(CN5N=NC(CN6CCN(C7=CC=CC=C7)CC6)=C5)=O)CC4)=O)[C@2(C)[C@H](C)CC3             | 5.26 |
| O=C(CC1)[C@2]([H])[C@@31[C@@H](C)[C@H](O)[C@](C)(C=C)C[C@@H](OC(CN4CCN(C(CN5N=NC(CN6CCN(N(CC)CC)CC6)=C5)=O)CC4)=O)[C@2(C)[C@H](C)CC3                 | 5.26 |
| O=C(CC1)[C@2]([H])[C@@31[C@@H](C)[C@H](O)[C@](C)(C=C)C[C@@H](OC(CN4CCN(C(CN5N=NC(CN6CCN(N7CCCC7)CC6)=C5)=O)CC4)=O)[C@2(C)[C@H](C)CC3                 | 5.26 |
| O=C1CC[C@2](CC[C@H]3C)[C@1]([H])[C@3(C)[C@H](OC(CN4CCN(C(NCC5=CC=C(NC(CN6CCOCC6)=O)C=C5)=O)CC4)=O)C[C@@](C)(C=C)[C@@H](O)[C@@H]2C                    | 5.26 |
| O=C(CC1)[C@2]([H])[C@@31[C@@H](C)[C@H](O)[C@](C)(C=C)C[C@@H](OC(CSC4=C(NC(CN5CCN(C6=CC(OC)=CC=C6)CC5)=O)C=CC=C4)=O)[C@2(C)[C@H](C)CC3                | 5.25 |
| O=C(CC1)[C@2]([H])[C@@31[C@@H](C)[C@H](O)[C@](C)(C=C)C[C@@H](OC(CSCC4=CC(C(O)=CN4C)=O)=O)[C@2(C)[C@H](C)CC3                                          | 5.25 |
| O=C(CC1)[C@2]([H])[C@@31[C@@H](C)[C@H](O)[C@](C)(C=C)C[C@@H](OC(CN(C)CCN(C)C(CCN4C=NC5=C4N=CN=C5N6CCC(N)C6)=O)=O)[C@2(C)[C@H](C)CC3                  | 5.25 |
| O=C(CC1)[C@2]([H])[C@@31[C@@H](C)[C@H](O)[C@](C)(C=C)C[C@@H](OC(CN4CCN(C(CN5N=NC(CN6CCN(N(C)C)CC6)=C5)=O)CC4)=O)[C@2(C)[C@H](C)CC3                   | 5.24 |
| O=C1CC[C@2](CC[C@H]3C)[C@1]([H])[C@3(C)[C@H](OC(CN4CCN(C(C(C)C)CC)NC(OC(C)(C)C)=O)=O)CC4)=O)C[C@@](C)(C=C)[C@@H](O)[C@@H]2C                          | 5.22 |
| O=C1CC[C@2](CC[C@H]3C)[C@1]([H])[C@3(C)[C@H](OC(CSC4=NC(NC=C5)=C5C(NC(CN6CCNCC6)=O)=N4)=O)C[C@@](C)(C=C)[C@@H](O)[C@@H]2C                            | 5.21 |
| O=C(CC1)[C@2]([H])[C@@31[C@@H](C)[C@H](O)[C@](C)(C=C)C[C@@H](OC(CSC4=NN=C(C)N4=N/C=C5=CC=C(N(CC)CC)C=C5)=O)[C@2(C)[C@H](C)CC3                        | 5.21 |
| O=C1CC[C@2](CC[C@H]3C)[C@1]([H])[C@3(C)[C@H](OC(CN4CCN(C(NC5=CN=C(Br)C=C5)=O)CC4)=O)C[C@@](C)(C=C)[C@@H](O)[C@@H]2C                                  | 5.21 |
| O=C(CC1)[C@2]([H])[C@@31[C@@H](C)[C@H](O)[C@](C)(C=C)C[C@@H](OC(CN4N=NC(CN5CCN(C6=CC=CC=C6Cl)CC5)=C4)=O)[C@2(C)[C@H](C)CC3                           | 5.20 |
| O=C(CC1)[C@2]([H])[C@@31[C@@H](C)[C@H](O)[C@](C)(C=C)C[C@@H](OC(CN4N=NC(CN5CCN(C6=CC=CC(Cl)=C6)CC5)=C4)=O)[C@2(C)[C@H](C)CC3                         | 5.20 |
| O=C(CC1)[C@2]([H])[C@@31[C@@H](C)[C@H](O)[C@](C)(C=C)C[C@@H](OC(CN4N=NC(CN5CCN(C6=CC=C(Cl)C=C6)CC5)=C4)=O)[C@2(C)[C@H](C)CC3                         | 5.20 |
| O=C1CC[C@2](CC[C@H]3C)[C@1]([H])[C@3(C)[C@H](OC(CSC4=NC(O)=CC(NC(C5=CC=C(OC)C=C5)=O)=N4)=O)C[C@@](C)(C=C)[C@@H](O)[C@@H]2C                           | 5.20 |
| O=C(CC1)[C@2]([H])[C@@31[C@@H](C)[C@H](O)[C@](C)(C=C)C[C@@H](OC(CSC4=NC(N)=CC(NC(C5=CC=C(OC)C=C5)=O)=N4)=O)[C@2(C)[C@H](C)CC3                        | 5.20 |
| O=C(CC1)[C@2]([H])[C@@31[C@@H](C)[C@H](O)[C@](C)(C=C)C[C@@H](OC(CN4N=NC(CN5CCN(C6=CC=CC=C6OC)CC5)=C4)=O)[C@2(C)[C@H](C)CC3                           | 5.20 |
| O=C(CC1)[C@2]([H])[C@@31[C@@H](C)[C@H](O)[C@](C)(C=C)C[C@@H](OC(CN4N=NC(CN5CCN(C6=CC=CC(OC)=C6)CC5)=C4)=O)[C@2(C)[C@H](C)CC3                         | 5.20 |
| O=C(CC1)[C@2]([H])[C@@31[C@@H](C)[C@H](O)[C@](C)(C=C)C[C@@H](OC(CN4N=NC(CN5CCN(C6=CC=C(OC)C=C6)CC5)=C4)=O)[C@2(C)[C@H](C)CC3                         | 5.20 |
| O=C(CC1)[C@2]([H])[C@@31[C@@H](C)[C@H](O)[C@](C)(C=C)C[C@@H](OC(CSCC4=CSC(NC(CN5CCNCC5)=O)=N4)=O)[C@2(C)[C@H](C)CC3                                  | 5.20 |
| O=C(CC1)[C@2]([H])[C@@31[C@@H](C)[C@H](O)[C@](C)(C=C)C[C@@H](OC(CSC4=NN=C(NC(C5=CC=C(Cl)C=C5)=O)S4)=O)[C@2(C)[C@H](C)CC3                             | 5.20 |
| O=C1CC[C@2](CC[C@H]3C)[C@1]([H])[C@3(C)[C@H](OC(CN4CCN(C(NCCC5=CC(OC)=CC=C5)=O)CC4)=O)C[C@@](C)(C=C)[C@@H](O)[C@@H]2C                                | 5.19 |

|                                                                                                                                                       |      |
|-------------------------------------------------------------------------------------------------------------------------------------------------------|------|
| O=C(CC1)[C@2]([H])[C@@31][C@@H](C)[C@H](O)[C@](C)(C=C)C[C@@H](OC(CN4N=NC(CN(C5CCCCC5)C6CCCCC6)=C4)=O)[C@2](C)[C@H](C)CC3                              | 5.19 |
| O=C1CC[C@2](CC[C@H]3C)[C@1]([H])[C@3](C)[C@H](OC(CN4CCN(C(NC5=CC=CC(NC(C)=O)=C5)=O)CC4)=O)C[C@@]([C](C=C)[C@@H](O)[C@@H]2C                            | 5.19 |
| O=C(CC1)[C@2]([H])[C@@31][C@@H](C)[C@H](O)[C@](C)(C=O)C[C@@H](OC(CN4N=NC(CN5CCN(C6=CC=CC(F)=C6)CC5)=C4)=O)[C@2](C)[C@H](C)CC3                         | 5.19 |
| O=C(CC1)[C@2]([H])[C@@31][C@@H](C)[C@H](O)[C@](C)(C=O)C[C@@H](OC(CN4N=NC(CN5CCN(C6=CC=CC(F)=C6)CC5)=C4)=O)[C@2](C)[C@H](C)CC3                         | 5.19 |
| O=C1CC[C@2](CC[C@H]3C)[C@1]([H])[C@3](C)[C@H](OC(CSC4=NC(O)=CC(NC(C5=CC=C(C)C=C5)=O)=N4)=O)C[C@@]([C](C=C)[C@@H](O)[C@@H]2C                           | 5.19 |
| O=C(CC1)[C@2]([H])[C@@31][C@@H](C)[C@H](O)[C@](C)(C=O)C[C@@H](OC(CSC4=NC(N)=CC(NC(C5=CC=C(C)C=C5)=O)=N4)=O)[C@2](C)[C@H](C)CC3                        | 5.19 |
| O=C(CC1)[C@2]([H])[C@@31][C@@H](C)[C@H](O)[C@](C)(C=O)C[C@@H](OC(CN4N=NC(CN5CCN(C6=CC=CC=C6O)CC5)=C4)=O)[C@2](C)[C@H](C)CC3                           | 5.19 |
| O=C(CC1)[C@2]([H])[C@@31][C@@H](C)[C@H](O)[C@](C)(C=O)C[C@@H](OC(CN4N=NC(CN5CCN(C6=CC=CC(O)=C6)CC5)=C4)=O)[C@2](C)[C@H](C)CC3                         | 5.19 |
| O=C(CC1)[C@2]([H])[C@@31][C@@H](C)[C@H](O)[C@](C)(C=O)C[C@@H](OC(CN4N=NC(C5=CC=C(C)C=C6)CC5)=C4)=O)[C@2](C)[C@H](C)CC3                                | 5.19 |
| O=C(CC1)[C@2]([H])[C@@31][C@@H](C)[C@H](O)[C@](C)(C=O)C[C@@H](OC(CN4N=NC(CN5CCN(C6=CC=CC(C)C=C6)CC5)=C4)=O)[C@2](C)[C@H](C)CC3                        | 5.19 |
| O=C1CC[C@2](CC[C@H]3C)[C@1]([H])[C@3](C)[C@H](OC(CSC4=NC(O)=CC(NC([C@@H]5NCCCC5)=O)=N4)=O)C[C@@]([C](C=C)[C@@H](O)[C@@H]2C                            | 5.19 |
| O=C(CC1)[C@2]([H])[C@@31][C@@H](C)[C@H](O)[C@](C)(C=O)C[C@@H](OC(CSC4=NC(N)=CC(NC([C@H]5CCCCN5)=O)=N4)=O)[C@2](C)[C@H](C)CC3                          | 5.19 |
| O=C(CC1)[C@2]([H])[C@@31][C@@H](C)[C@H](O)[C@](C)(C=O)C[C@@H](OC(CSC4=NN=C(NC(C5=CC=CC=C5N)=O)S4)=O)[C@2](C)[C@H](C)CC3                               | 5.19 |
| O=C(CC1)[C@2]([H])[C@@31][C@@H](C)[C@H](O)[C@](C)(C=O)C[C@@H](OC(CN4N=NC(CN5CCN(C6=CC=CC=C6)CC5)=C4)=O)[C@2](C)[C@H](C)CC3                            | 5.18 |
| O=C1CC[C@2](CC[C@H]3C)[C@1]([H])[C@3](C)[C@H](OC(CN4CCN(C(NCC5=CC=CC(C)C=C5)=O)CC4)=O)C[C@@]([C](C=C)[C@@H](O)[C@@H]2C                                | 5.18 |
| O=C1CC[C@2](CC[C@H]3C)[C@1]([H])[C@3](C)[C@H](OC(CN4CCN(C(NCCN5COCOC5)=O)CC4)=O)C[C@@]([C](C=C)[C@@H](O)[C@@H]2C                                      | 5.18 |
| O=C(CC1)[C@2]([H])[C@@31][C@@H](C)[C@H](O)[C@](C)(C=O)C[C@@H](OC(CN4CCN(C(NCCN5CCCC5)=O)CC4)=O)[C@2](C)[C@H](C)CC3                                    | 5.18 |
| O=C1CC[C@2](CC[C@H]3C)[C@1]([H])[C@3](C)[C@H](OC(CN4CCN(C(NCCN5CCCC5)=O)CC4)=O)C[C@@]([C](C=C)[C@@H](O)[C@@H]2C                                       | 5.18 |
| O=C(CC1)[C@2]([H])[C@@31][C@@H](C)[C@H](O)[C@](C)(C=O)C[C@@H](OC(CSC(C)(O)CNC(OC4=CC=CC=C4)=O)=O)[C@2](C)[C@H](C)CC3                                  | 5.18 |
| O=C(CC1)[C@2]([H])[C@@31][C@@H](C)[C@H](O)[C@](C)(C=O)C[C@@H](OC(C5(S(C4=NN=NN4CCN(C)C)=O)=O)[C@2](C)[C@H](C)CC3                                      | 5.17 |
| O=C1CC[C@2](CC[C@H]3C)[C@1]([H])[C@3](C)[C@H](OC(CN4CCN(C(NCC5=CC=CC(C)=O)CC4)=O)C[C@@]([C](C=C)[C@@H](O)[C@@H]2C                                     | 5.17 |
| N[C@@H](CC1=CC=CC=C1)C(N(C2)CCN2CC(O)[C@@H]([C@3](C)[C@H](C)CC4)C[C@@]([C](C=C)[C@@H](O)[C@H](C)[C@@]54[C@@]3([H])C(CC5)=O)=O)=O                      | 5.17 |
| O=C(CC1)[C@2]([H])[C@@31][C@@H](C)[C@H](O)[C@](C)(C=O)C[C@@H](OC(CSC(C)(O)CNC(CN4CCOCC4)=O)=O)[C@2](C)[C@H](C)CC3                                     | 5.17 |
| O=C(CC1)[C@2]([H])[C@@31][C@@H](C)[C@H](O)[C@](C)(C=O)C[C@@H](OC(CN4N=NC(C5=CC=C(CN(C)C)C=C5)=C4)=O)[C@2](C)[C@H](C)CC3                               | 5.17 |
| O=C(CC1)[C@2]([H])[C@@31][C@@H](C)[C@H](O)[C@](C)(C=O)C[C@@H](OC(CSC4=NN=C(NC(N5CCCC5)=O)S4)=O)[C@2](C)[C@H](C)CC3                                    | 5.17 |
| O=C(CC1)[C@2]([H])[C@@31][C@@H](C)[C@H](O)[C@](C)(C=O)C[C@@H](OC(CN4CCN(C(CNC5CCCC5)=O)CC4)=O)[C@2](C)[C@H](C)CC3                                     | 5.17 |
| N[C@@H](C1CCCC1)C(N(C2)CCN2CC(O)[C@@H]([C@3](C)[C@H](C)CC4)C[C@@]([C](C=C)[C@@H](O)[C@H](C)[C@@]54[C@@]3([H])C(CC5)=O)=O)=O                           | 5.17 |
| O=C1CC[C@2](CC[C@H]3C)[C@1]([H])[C@3](C)[C@H](OC(CN4CCN(C(NCC5=CC=CC(C)=O)CC4)=O)C[C@@]([C](C=C)[C@@H](O)[C@@H]2C                                     | 5.16 |
| O=C1CC[C@2](CC[C@H]3C)[C@1]([H])[C@3](C)[C@H](OC(CN4CCN(C(NCC5=CC=CC(C)=O)CC4)=O)C[C@@]([C](C=C)[C@@H](O)[C@@H]2C                                     | 5.16 |
| O=C(CC1)[C@2]([H])[C@@31][C@@H](C)[C@H](O)[C@](C)(C=O)C[C@@H](OC(CSC(C)(O)CNC(CN4CCCC4)=O)=O)[C@2](C)[C@H](C)CC3                                      | 5.16 |
| O=C(CC1)[C@2]([H])[C@@31][C@@H](C)[C@H](O)[C@](C)(C=O)C[C@@H](OC(CN4CCN(C(NC5=CC=NC(C)=O)CC4)=O)[C@2](C)[C@H](C)CC3                                   | 5.15 |
| N[C@@H](CC(C)C)C(N(C1)CCN1CC(O)[C@@H]([C@2](C)[C@H](C)CC3)C[C@@]([C](C=C)[C@@H](O)[C@H](C)[C@@]43[C@@]2([H])C(CC4)=O)=O)=O                            | 5.15 |
| O=C1CC[C@2](CC[C@H]3C)[C@1]([H])[C@3](C)[C@H](OC(CN4CCN(C(C(C)C(C)C)N)=O)CC4)=O)C[C@@]([C](C=C)[C@@H](O)[C@@H]2C                                      | 5.15 |
| O=C(CC1)[C@2]([H])[C@@31][C@@H](C)[C@H](O)[C@](C)(C=O)C[C@@H](OC(CN4CCN(C(CN5CCCC5)=O)CC4)=O)[C@2](C)[C@H](C)CC3                                      | 5.14 |
| O=C1CC[C@2](CC[C@H]3C)[C@1]([H])[C@3](C)[C@H](OC(CN4CCN(C([C@H]([C@@H](C)O)N)=O)CC4)=O)C[C@@]([C](C=C)[C@@H](O)[C@@H]2C                               | 5.14 |
| N[C@@H](C(C)C)C(N(C1)CCN1CC(O)[C@@H]([C@2](C)[C@H](C)CC3)C[C@@]([C](C=C)[C@@H](O)[C@H](C)[C@@]43[C@@]2([H])C(CC4)=O)=O)=O                             | 5.13 |
| O=C1CC[C@2](CC[C@H]3C)[C@1]([H])[C@3](C)[C@H](OC(CN4CCN(C5=CC=C(C)C=C5)CC4)=O)C[C@@]([C](C=C)[C@@H](O)[C@@H]2C                                        | 5.13 |
| O=C1CC[C@2](CC[C@H]3C)[C@1]([H])[C@3](C)[C@H](OC(CN4CCN(C5=CC=C(C)C=C5)CC4)=O)C[C@@]([C](C=C)[C@@H](O)[C@@H]2C                                        | 5.13 |
| O=C(CC1)[C@2]([H])[C@@31][C@@H](C)[C@H](O)[C@](C)(C=O)C[C@@H](OC(CN4N=NC(C5=CC=C(C)C=C5)CC4)=O)[C@2](C)[C@H](C)CC3                                    | 5.13 |
| O=C(CC1)[C@2]([H])[C@@31][C@@H](C)[C@H](O)[C@](C)(C=O)C[C@@H](OC(CNCC4=CC=C(F)C=C4)=O)[C@2](C)[C@H](C)CC3                                             | 5.08 |
| O=C(CC1)[C@2]([H])[C@@31][C@@H](C)[C@H](O)[C@](C)(C=O)C[C@@H](OC(CN4CCCC4)=O)[C@2](C)[C@H](C)CC3                                                      | 5.05 |
| O=C(CC1)[C@2]([H])[C@@31][C@@H](C)[C@H](O)[C@](C)(C=O)C[C@@H](OC(CNCCCC)=O)[C@2](C)[C@H](C)CC3                                                        | 5.04 |
| O=C(CC1)[C@2]([H])[C@@31][C@@H](C)[C@H](O)[C@](C)(C=O)C[C@@H](OC(CNC(C)CC)=O)[C@2](C)[C@H](C)CC3                                                      | 5.04 |
| O=C(CC1)[C@2]([H])[C@@31][C@@H](C)[C@H](O)[C@](C)(C=O)C[C@@H](OC(CO)O)C[C@@H](OC(CO)=O)[C@2](C)[C@H](C)CC3                                            | 5.01 |
| O=C(CC1)[C@2]([H])[C@@31][C@@H](C)[C@H](O)[C@](C)(C4CO4)C[C@@H](OC(CO)=O)[C@2](C)[C@H](C)CC3                                                          | 4.99 |
| O=C1CC[C@2](CC[C@H]3C)[C@1]([H])[C@3](C)[C@H](OC(CN4CCN(C([C@H](CCCCNC(OC(C)C)=O)NC(OC(C)C)=O)=O)CC4)=O)C[C@@]([C](C=C)[C@@H](O)[C@@H]2C              | 4.99 |
| O=C(CC1)[C@2]([H])[C@@31][C@@H](C)[C@H](O)[C@](C)(C=O)C[C@@H](OC(CSC4=CC(C(NC5=CC=C(S)=O)(NC6=NC(C)=CC(C)=N6)=O)C=C5)=O)=CC=C4)=O)[C@2](C)[C@H](C)CC3 | 4.99 |
| O=C(CC1)[C@2]([H])[C@@31][C@@H](C)[C@H](O)[C@](C)(C=O)C[C@@H](OC(CN4CCN(C(CN5N=NC(CN6CCN(C7=CC=CC=C7C1)CC6)=C5)=O)CC4)=O)[C@2](C)[C@H](C)CC3          | 4.98 |
| O=C(CC1)[C@2]([H])[C@@31][C@@H](C)[C@H](O)[C@](C)(C=O)C[C@@H](OC(CSC4=CC(C(NC5=CC=C(S)=O)(NC6=NOC(C)=C6)=O)C=C5)=O)=CC=C4)=O)[C@2](C)[C@H](C)CC3      | 4.97 |
| O=C(CC1)[C@2]([H])[C@@31][C@@H](C)[C@H](O)[C@](C)(C=O)C[C@@H](OC(CN4CCN(C(CN5N=NC(CN6CCN(C7=CC=CC=C7F)CC6)=C5)=O)CC4)=O)[C@2](C)[C@H](C)CC3           | 4.97 |
| O=C(CC1)[C@2]([H])[C@@31][C@@H](C)[C@H](O)[C@](C)(C=O)C[C@@H](OC(CN4CCN(C(CN5N=NC(CN6CCN(C7=CC=CC=C7O)CC6)=C5)=O)CC4)=O)[C@2](C)[C@H](C)CC3           | 4.97 |
| O=C(CC1)[C@2]([H])[C@@31][C@@H](C)[C@H](O)[C@](C)(C=O)C[C@@H](OC(CN4CCN(C(CN5N=NC(CN6CCN(C7=CC=C(C)C=C7)CC6)=C5)=O)CC4)=O)[C@2](C)[C@H](C)CC3         | 4.97 |
| O=C(CC1)[C@2]([H])[C@@31][C@@H](C)[C@H](O)[C@](C)(C=O)C[C@@H](OC(CSC4=C(NC(CN5CCN(C6=C(C1)C=CC=C6)CC5)=O)C=CC=C4)=O)[C@2](C)[C@H](C)CC3               | 4.96 |
| O=C(CC1)[C@2]([H])[C@@31][C@@H](C)[C@H](O)[C@](C)(C=O)C[C@@H](OC(CSC4=C(NC(CN5CCN(C6=CC(C)C=CC=C6)CC5)=O)C=CC=C4)=O)[C@2](C)[C@H](C)CC3               | 4.94 |
| O=C(N(C1)CCN1CC(O)[C@@H]([C@2](C)[C@H](C)CC3)C[C@@]([C](C=C)[C@@H](O)[C@H](C)[C@@]43[C@@]2([H])C(CC4)=O)=O)[C@H](C5CCCCC5)NC(OC(C)C)=O                | 4.93 |
| O=C(CC1)[C@2]([H])[C@@31][C@@H](C)[C@H](O)[C@](C)(C=O)C[C@@H](OC(CN4N=NC(C5=CC=CC(C6=CC=C(CN(C)C)C=C6)=C5)=C4)=O)[C@2](C)[C@H](C)CC3                  | 4.93 |

|                                                                                                                                                    |      |
|----------------------------------------------------------------------------------------------------------------------------------------------------|------|
|                                                                                                                                                    |      |
|                                                                                                                                                    |      |
|                                                                                                                                                    |      |
|                                                                                                                                                    |      |
|                                                                                                                                                    |      |
|                                                                                                                                                    |      |
|                                                                                                                                                    |      |
|                                                                                                                                                    |      |
|                                                                                                                                                    |      |
| O=C(CC1)[C@2]([H])[C@@31[C@@H](C)[C@H](O)[C@](C)(C=C)C[C@@H](OC(CSCC4=CSC(NC(CN(CCCC)CCCC)=O)=N4)=O)[C@2](C)[C@H](C)CC3                            | 4.93 |
| O=C(CC1)[C@2]([H])[C@@31[C@@H](C)[C@H](O)[C@](C)(C=C)C[C@@H](OC(N4CC5=C(C=CC=C5OCCCN6C7=CC=CN=C7N=C6)C4=O)=O)[C@2](C)[C@H](C)CC3                   | 4.92 |
| O=C(CC1)[C@2]([H])[C@@31[C@@H](C)[C@H](O)[C@](C)(C=C)C[C@@H](OC(CN4CCN(C(CN5N=NC(CN6CCN(C)CC6)=C5)=O)CC4)=O)[C@2](C)[C@H](C)CC3                    | 4.92 |
| O=C(CC1)[C@2]([H])[C@@31[C@@H](C)[C@H](O)[C@](C)(C=C)C[C@@H](OC(CN4CCN(C5=CC=C(C/C=C/C6=CC=CC(N)=C6)=O)C=C5)CC4)=O)[C@2](C)[C@H](C)CC3             | 4.92 |
| O=C(N(CC1)CCN1CC(O)[C@@H]([C@2](C)[C@H](C)CC3)C[C@@](C)(C=C)[C@@H](O)[C@H](C)[C@@43[C@@2]([H])C(CC4)=O)=O)[C@H](CC(C)C)NC(OC(C)C)C=O               | 4.92 |
| O=C(CC1)[C@2]([H])[C@@31[C@@H](C)[C@H](O)[C@](C)(C=C)C[C@@H](OC(CSC4=NN=C(NC(C5=CC(OC)=CC=C5)=O)S4)=O)[C@2](C)[C@H](C)CC3                          | 4.89 |
| O=C(CC1)[C@2]([H])[C@@31[C@@H](C)[C@H](O)[C@](C)(C=C)C[C@@H](OC(CSC4=NN=C(NC([C@H](C5=CC=CC=C5)C)=O)S4)=O)[C@2](C)[C@H](C)CC3                      | 4.89 |
| O=C(CC1)[C@2]([H])[C@@31[C@@H](C)[C@H](O)[C@](C)(C=C)C[C@@H](OC(CN4N=NC(C5=CC=C(C6=CC=C(OC)C=C6)C=C5)=C4)=O)[C@2](C)[C@H](C)CC3                    | 4.89 |
| O=C(CC1)[C@2]([H])[C@@31[C@@H](C)[C@H](O)[C@](C)(C=C)C[C@@H](OC(CN4N=NC(COCCN5C=NC6=C5N=CN=C6N)=C4)=O)[C@2](C)[C@H](C)CC3                          | 4.89 |
| O=C(CC1)[C@2]([H])[C@@31[C@@H](C)[C@H](O)[C@](C)(C=C)C[C@@H](OC(CSC4=NN=C(NC(N5CCN(C)CC5)=O)S4)=O)[C@2](C)[C@H](C)CC3                              | 4.89 |
| O=C(CC1)[C@2]([H])[C@@31[C@@H](C)[C@H](O)[C@](C)(C=C)C[C@@H](OC(CN4N=NC(CN5CCN(C6=CC=C(O)C=C6)CC5)=C4)=O)[C@2](C)[C@H](C)CC3                       | 4.89 |
| O=C(CC1)[C@2]([H])[C@@31[C@@H](C)[C@H](O)[C@](C)(C=C)C[C@@H](OC(CSCC4=CSC(NC(C5=CC=C5)=O)=N4)=O)[C@2](C)[C@H](C)CC3                                | 4.89 |
| O=C1CC[C@2](CC[C@H]3C)[C@1]([H])[C@3](C)[C@H](OC(CSC4=NC(O)=CC(NC([C@H]5NCCCC5)=O)=N4)=O)C[C@@](C)(C=C)[C@@H](O)[C@@H]2C                           | 4.89 |
| O=C(CC1)[C@2]([H])[C@@31[C@@H](C)[C@H](O)[C@](C)(C=C)C[C@@H](OC(CSC4=NC(N)=CC(NC([C@@H]5CCCCN5)=O)=N4)=O)[C@2](C)[C@H](C)CC3                       | 4.88 |
| O=C(CC1)[C@2]([H])[C@@31[C@@H](C)[C@H](O)[C@](C)(C=C)C[C@@H](OC(CN4N=NC=C4CCCN5C(N=CN=C6N)=C6N=C5)=O)[C@2](C)[C@H](C)CC3                           | 4.88 |
| O=C(CC1)[C@2]([H])[C@@31[C@@H](C)[C@H](O)[C@](C)(C=C)C[C@@H](OC(CSC(C)(C)CNC(C4=CC(Cl)=CC=C4)=O)=O)[C@2](C)[C@H](C)CC3                             | 4.88 |
| O=C1CC[C@2](CC[C@H]3C)[C@1]([H])[C@3](C)[C@H](OC(CN4CCN(C(NCC5=CC=C(N)C=C5)=O)CC4)=O)C[C@@](C)(C=C)[C@@H](O)[C@@H]2C                               | 4.87 |
| O=C(CC1)[C@2]([H])[C@@31[C@@H](C)[C@H](O)[C@](C)(C=C)C[C@@H](OC(CSC4=NN=C(NC(N(CC)CC)=O)S4)=O)[C@2](C)[C@H](C)CC3                                  | 4.87 |
| O=C(CC1)[C@2]([H])[C@@31[C@@H](C)[C@H](O)[C@](C)(C=C)C[C@@H](OC(CSC4=NN=C(NC([C@H](C)C)N)=O)S4)=O)[C@2](C)[C@H](C)CC3                              | 4.87 |
| O=C(CC1)[C@2]([H])[C@@31[C@@H](C)[C@H](O)[C@](C)(C=C)C[C@@H](OC(CN4CCN(C(CN(CCC)CCC)=O)CC4)=O)[C@2](C)[C@H](C)CC3                                  | 4.87 |
| O=C1CC[C@2](CC[C@H]3C)[C@1]([H])[C@3](C)[C@H](OC(CN4CCN(C(NC5=CC=C(N)=CC=C5)=O)CC4)=O)C[C@@](C)(C=C)[C@@H](O)[C@@H]2C                              | 4.86 |
| O=C1CC[C@2](CC[C@H]3C)[C@1]([H])[C@3](C)[C@H](OC(CN4CCN(C(NC5=CC=C(N)C=C5)=O)CC4)=O)C[C@@](C)(C=C)[C@@H](O)[C@@H]2C                                | 4.86 |
| O=C(CC1)[C@2]([H])[C@@31[C@@H](C)[C@H](O)[C@](C)(C=C)C[C@@H](OC(CN4N=NC(CN5CCCC(CCO)C5)=C4)=O)[C@2](C)[C@H](C)CC3                                  | 4.85 |
| O=C(CC1)[C@2]([H])[C@@31[C@@H](C)[C@H](O)[C@](C)(C=C)C[C@@H](OC(CN4CCN(C(CN(CC)CC)=O)CC4)=O)[C@2](C)[C@H](C)CC3                                    | 4.84 |
| O=C(CC1)[C@2]([H])[C@@31[C@@H](C)[C@H](O)[C@](C)(C=C)C[C@@H](OC(CN4N=NC(CN5CCCC(CO)C5)=C4)=O)[C@2](C)[C@H](C)CC3                                   | 4.84 |
| O=C(CC1)[C@2]([H])[C@@31[C@@H](C)[C@H](O)[C@](C)(C=C)C[C@@H](OC(CN4N=NC(CN5CCC(O)CC5)=C4)=O)[C@2](C)[C@H](C)CC3                                    | 4.83 |
| O=C(CC1)[C@2]([H])[C@@31[C@@H](C)[C@H](O)[C@](C)(C=C)C[C@@H](OC(CN4N=NC(CN5CCN(C)CC5)=C4)=O)[C@2](C)[C@H](C)CC3                                    | 4.83 |
| O=C(CC1)[C@2]([H])[C@@31[C@@H](C)[C@H](O)[C@](C)(C=C)C[C@@H](OC(CSC4=NC(C=CC(NC(C5=CC=C(C=C=CC6)N5)=O)=C7=C7N4)=O)[C@2](C)[C@H](C)CC3              | 4.83 |
| O=C(CC1)[C@2]([H])[C@@31[C@@H](C)[C@H](O)[C@](C)(C=C)C[C@@H](OC(CN4N=NC(CN5CCOCC5)=C4)=O)[C@2](C)[C@H](C)CC3                                       | 4.82 |
| O=C(CC1)[C@2]([H])[C@@31[C@@H](C)[C@H](O)[C@](C)(C=C)C[C@@H](OC(CN4N=NC(CN(CCO)CO)=C4)=O)[C@2](C)[C@H](C)CC3                                       | 4.81 |
| O=C(CC1)[C@2]([H])[C@@31[C@@H](C)[C@H](O)[C@](C)(C=C)C[C@@H](OC(CN4N=NC(CN(C)C)=C4)=O)[C@2](C)[C@H](C)CC3                                          | 4.78 |
| O=C(CC1)[C@2]([H])[C@@31[C@@H](C)[C@H](O)[C@](C)(C=C)C[C@@H](OC(CN(CC)CC)=O)[C@2](C)[C@H](C)CC3                                                    | 4.73 |
| O=C(CC1)[C@2]([H])[C@@31[C@@H](C)[C@H](O)[C@](C)(C=C)C[C@@H](OC(C[N+](CC)(CC)C)=O)[C@2](C)[C@H](C)CC3                                              | 4.70 |
| O=C(CC1)[C@2]([H])[C@@31[C@@H](C)[C@H](O)[C@](C)(C=C)C[C@@H](OC(CN4CCN(C(CN5N=NC(CN6CCN(N7CCC(CCO)CC7)CC6)=C5)=O)CC4)=O)[C@2](C)[C@H](C)CC3        | 4.69 |
| O=C(CC1)[C@2]([H])[C@@31[C@@H](C)[C@H](O)[C@](C)(C=C)C[C@@H](OC(CN4CCN(C(CN5N=NC(CN6CCN(N7CCCC(CO)C7)CC6)=C5)=O)CC4)=O)[C@2](C)[C@H](C)CC3         | 4.69 |
| O=C(CC1)[C@2]([H])[C@@31[C@@H](C)[C@H](O)[C@](C)(C=C)C[C@@H](OC(CSC4=CC(C(NC5=CC=C(S(=O)N)C6=CC(OC)=NC=N6)=O)C=C5)=O)=CC=C4)=O)[C@2](C)[C@H](C)CC3 | 4.69 |
| CC1C23C(C(C3)=O)C(C(C(C=C)C)C1O)OC(CO)=O)(C(C2)C)C                                                                                                 | 4.67 |
| O=C(CC1)[C@2]([H])[C@@31[C@@H](C)[C@H](O)[C@](C)(C=C)C[C@@H](OC(CN4CCN(C(CN5N=NC(CN6CCN(N7CCC(O)CC7)CC6)=C5)=O)CC4)=O)[C@2](C)[C@H](C)CC3          | 4.67 |
| O=C(CC1)[C@2]([H])[C@@31[C@@H](C)[C@H](O)[C@](C)(C=C)C[C@@H](OC(CSC4=C(NC(CN5CCN(C6=C(OC)C=CC=C6)CC5)=O)C=CC=C4)=O)[C@2](C)[C@H](C)CC3             | 4.65 |
| O=C(CC1)[C@2]([H])[C@@31[C@@H](C)[C@H](O)[C@](C)(C=C)C[C@@H](OC(CN4CCN(C5=CC=C(C/C=C/C6=CC=C(NC(C)=O)C=C6)=O)C=C5)CC4)=O)[C@2](C)[C@H](C)CC3       | 4.65 |
| O=C(CC1)[C@2]([H])[C@@31[C@@H](C)[C@H](O)[C@](C)(C=C)C[C@@H](OC(CSC4=C(NC(CN5CCN(C6=CC=C(C)C=C6)CC5)=O)C=CC=C4)=O)[C@2](C)[C@H](C)CC3              | 4.64 |
| O=C1CC[C@2](CC[C@H]3C)[C@1]([H])[C@3](C)[C@H](OC(CN4CCN(C(C(C5=CN)C6=C5C=CC=C6)N)=O)CC4)=O)C[C@@](C)(C=C)[C@@H](O)[C@@H]2C                         | 4.60 |
| O=C(CC1)[C@2]([H])[C@@31[C@@H](C)[C@H](O)[C@](C)(C=C)C[C@@H](OC(CN4N=NC(C5=CC=CC(C6=CC=C(OC)C=C6)=C5)=C4)=O)[C@2](C)[C@H](C)CC3                    | 4.59 |
| O=C(CC1)[C@2]([H])[C@@31[C@@H](C)[C@H](O)[C@](C)(C=C)C[C@@H](OC(CSC4=NN=C(C5=CC=C(Br)C=C5)O4)=O)[C@2](C)[C@H](C)CC3                                | 4.59 |
| O=C(CC1)[C@2]([H])[C@@31[C@@H](C)[C@H](O)[C@](C)(C=C)C[C@@H](OC(CSCC4=CSC(NC(CN5C=CC=C5)=O)=N4)=O)[C@2](C)[C@H](C)CC3                              | 4.58 |
| O=C(CC1)[C@2]([H])[C@@31[C@@H](C)[C@H](O)[C@](C)(C=C)C[C@@H](OC(CN4CCN(C(CNC5=CC=CC=C5)=O)CC4)=O)[C@2](C)[C@H](C)CC3                               | 4.56 |
| O=C1CC[C@2](CC[C@H]3C)[C@1]([H])[C@3](C)[C@H](OC(CN4CCN(C(NC5=CC=CC=C5)C)=O)CC4)=O)C[C@@](C)(C=C)[C@@H](O)[C@@H]2C                                 | 4.56 |
| O=C1CC[C@2](CC[C@H]3C)[C@1]([H])[C@3](C)[C@H](OC(CN4CCN(C([C@H](CCCCN)N)=O)CC4)=O)C[C@@](C)(C=C)[C@@H](O)[C@@H]2C                                  | 4.56 |
| O=C(CC1)[C@2]([H])[C@@31[C@@H](C)[C@H](O)[C@](C)(C=C)C[C@@H](OC(CN4CCN(C(CN5CCOCC5)=O)CC4)=O)[C@2](C)[C@H](C)CC3                                   | 4.55 |
| O=C(CC1)[C@2]([H])[C@@31[C@@H](C)[C@H](O)[C@](C)(C=C)C[C@@H](OC(CSC4=NN=C(C5=CC=CC=C5)O4)=O)[C@2](C)[C@H](C)CC3                                    | 4.55 |
| O=C(CC1)[C@2]([H])[C@@31[C@@H](C)[C@H](O)[C@](C)(C=C)C[C@@H](OC(CSC4=NN=C(C5=CC=C(C)C=C5)O4)=O)[C@2](C)[C@H](C)CC3                                 | 4.55 |
| O=C(CC1)[C@2]([H])[C@@31[C@@H](C)[C@H](O)[C@](C)(C=C)C[C@@H](OC(CN4CCN(C(CN5CCCC5)=O)CC4)=O)[C@2](C)[C@H](C)CC3                                    | 4.55 |
| O=C1CC[C@2](CC[C@H]3C)[C@1]([H])[C@3](C)[C@H](OC(CN4CCN(C(NC5=CC=NC=C5)=O)CC4)=O)C[C@@](C)(C=C)[C@@H](O)[C@@H]2C                                   | 4.55 |
| O=C(CC1)[C@2]([H])[C@@31[C@@H](C)[C@H](O)[C@](C)(C=C)C[C@@H](OC(CS(=C4=NC(O)=CC(O)=N4)=O)=O)[C@2](C)[C@H](C)CC3                                    | 4.54 |
| O=C(CC1)[C@2]([H])[C@@31[C@@H](C)[C@H](O)[C@](C)(C=C)C[C@@H](OC(CN4CCN(C(CN(C)C)=O)CC4)=O)[C@2](C)[C@H](C)CC3                                      | 4.52 |
| O=C(CC1)[C@2]([H])[C@@31[C@@H](C)[C@H](O)[C@](C)(C=C)C[C@@H](OC(CSC4=NC(C=CC(NC(C5=CC=CC(Cl)=C5)=O)=C6)=C6N4)=O)[C@2](C)[C@H](C)C                  | 4.52 |
| C3                                                                                                                                                 |      |

|                                                                                                                                                 |      |
|-------------------------------------------------------------------------------------------------------------------------------------------------|------|
| O=C(CC1)[C@]2([H])[C@@]31[C@@H](C)[C@H](O)[C@](C)(C=C)C[C@@H](OC(CSC4=NC(C=CC(NC(C5=CC=C(OC)C=C5)=O)=C6)=C6N4)=O)[C@]2(C)[C@H](C)CC3            | 4.52 |
| O=C(CC1)[C@]2([H])[C@@]31[C@@H](C)[C@H](O)[C@](C)(C=C)C[C@@H](OC(CNCCCCCCCC)=O)[C@]2(C)[C@H](C)CC3                                              | 4.49 |
| O=C(CC1)[C@]2([H])[C@@]31[C@@H](C)[C@H](O)[C@](C)(C=C)C[C@@H](OC(C[N+](4)(CCOCC4)C)=O)[C@]2(C)[C@H](C)CC3                                       | 4.46 |
| O=C(CC1)[C@]2([H])[C@@]31[C@@H](C)[C@H](O)[C@](C)(C=C)C[C@@H](OC(CSC4=NN=CO4)=O)[C@]2(C)[C@H](C)CC3                                             | 4.46 |
| O=C(CC1)[C@]2([H])[C@@]31[C@@H](C)[C@H](O)[C@](C)(C=C)C[C@@H](OC(C[N+](4)(CCCC4)C)=O)[C@]2(C)[C@H](C)CC3                                        | 4.46 |
| O=C(CC1)[C@]2([H])[C@@]31[C@@H](C)[C@H](O)[C@](C)(C=C)C[C@@H](OC(CSCCNC(C4=CC=CC(OC)=C4)=O)[C@]2(C)[C@H](C)CC3                                  | 4.36 |
| O=C(CC1)[C@]2([H])[C@@]31[C@@H](C)[C@H](O)[C@](C)(C=C)C[C@@H](OC(N4CC5=C(C=CC=C5OCCCN6C7=CC=CN=C7N=C6)C4=O)[C@]2(C)[C@H](C)CC3                  | 4.31 |
| O=C1CC[C@]2(CC[C@H]3C)[C@]1([H])[C@]3(C)[C@H](OC(CSC4=NC(O)=CC(NC(C5=CC=CC(Cl)=C5)=O)=N4)=O)C[C@@](C)(C=C)[C@@H](O)[C@@H]2C                     | 4.30 |
| O=C(CC1)[C@]2([H])[C@@]31[C@@H](C)[C@H](O)[C@](C)(C=C)C[C@@H](OC(CSC4=NC(N)=CC(NC(C5=CC(Cl)=CC=C5)=O)=N4)=O)[C@]2(C)[C@H](C)CC3                 | 4.30 |
| O=C(CC1)[C@]2([H])[C@@]31[C@@H](C)[C@H](O)[C@](C)(C=C)C[C@@H](OC(CSCC4=CSC(NC(CN5C=CN=N5)=O)=N4)=O)[C@]2(C)[C@H](C)CC3                          | 4.28 |
| O=C(CC1)[C@]2([H])[C@@]31[C@@H](C)[C@H](O)[C@](C)(C=C)C[C@@H](OC(CSCC4=CSC(NC(CN5C=CN=C5)=O)=N4)=O)[C@]2(C)[C@H](C)CC3                          | 4.28 |
| O=C(CC1)[C@]2([H])[C@@]31[C@@H](C)[C@H](O)[C@](C)(C=C)C[C@@H](OC(CNCCCCCCCCCCCCCCC)=O)[C@]2(C)[C@H](C)CC3                                       | 4.27 |
| O=C(CC1)[C@]2([H])[C@@]31[C@@H](C)[C@H](O)[C@](C)(C=C)C[C@@H](OC(CSC4=NN=C(NC([C@H](C(C)C)N)=O)S4)=O)[C@]2(C)[C@H](C)CC3                        | 4.27 |
| O=C(CC1)[C@]2([H])[C@@]31[C@@H](C)[C@H](O)[C@](C)(C=C)C[C@@H](OC(CN4CCN(C(CN5CCN(C)CC5)=O)CC4)=O)[C@]2(C)[C@H](C)CC3                            | 4.26 |
| O=C(CC1)[C@]2([H])[C@@]31[C@@H](C)[C@H](O)[C@](C)(C=C)C[C@@H](OC(CNCCCCCCCCCCCC)=O)[C@]2(C)[C@H](C)CC3                                          | 4.23 |
| O=C1CC[C@]2(CC[C@H]3C)[C@]1([H])[C@]3(C)[C@H](OC(CN4CCN(C(C5N(C(OC(C)C)C)=O)CC5)=O)CC4)=O)C[C@@](C)(C=C)[C@@H](O)[C@@H]2C                       | 4.23 |
| O=C(CC1)[C@]2([H])[C@@]31[C@@H](C)[C@H](O)[C@](C)(C=C)C[C@@H](OC(CS[C@H]4CC[C@H](C(O)=O)C[C@H]4N)=O)[C@]2(C)[C@H](C)CC3                         | 4.22 |
| O=C(CC1)[C@]2([H])[C@@]31[C@@H](C)[C@H](O)[C@](C)(C=C)C[C@@H](OC(CSCC4=CC(C(O)=CN4O)=O)[C@]2(C)[C@H](C)CC3                                      | 4.22 |
| O=C(CC1)[C@]2([H])[C@@]31[C@@H](C)[C@H](O)[C@](C)(C=C)C[C@@H](OC(CSC4=NC(C=CC(NC(C5=CC=CC=C5Cl)=O)=C6)=C6N4)=O)[C@]2(C)[C@H](C)CC3              | 4.22 |
| O=C(CC1)[C@]2([H])[C@@]31[C@@H](C)[C@H](O)[C@](C)(C=C)C[C@@H](OC(CSC4=NC(C=CC(NC(C5=CC=C(C)C=C5)=O)=C6)=C6N4)=O)[C@]2(C)[C@H](C)CC3             | 4.22 |
| O=C(CC1)[C@]2([H])[C@@]31[C@@H](C)[C@H](O)[C@](C)(C=C)C[C@@H](OC(CSC4=NC(C=CC(NC(C5=CC=CC=C5OC)=O)=C6)=C6N4)=O)[C@]2(C)[C@H](C)CC3              | 4.22 |
| O=C(CC1)[C@]2([H])[C@@]31[C@@H](C)[C@H](O)[C@](C)(C=C)C[C@@H](OC(CSC4=NC(C=CC(NC(C5=CC=CC(OC)=C5)=O)=C6)=C6N4)=O)[C@]2(C)[C@H](C)CC3            | 4.22 |
| O=C(CC1)[C@]2([H])[C@@]31[C@@H](C)[C@H](O)[C@](C)(C=C)C[C@@H](OC(CSC4=NC(C=CC(NC(C5=CC=CC=C5C)=O)=C6)=C6N4)=O)[C@]2(C)[C@H](C)CC3               | 4.21 |
| O=C(CC1)[C@]2([H])[C@@]31[C@@H](C)[C@H](O)[C@](C)(C=C)C[C@@H](OC(CSC4=NC(C=CC(NC(C5=CC=CC(C)C=C5)=O)=C6)=C6N4)=O)[C@]2(C)[C@H](C)CC3            | 4.21 |
| O=C(CC1)[C@]2([H])[C@@]31[C@@H](C)[C@H](O)[C@](C)(C=C)C[C@@H](OC(CSC4=NC(C=CC(NC(C5=CC=C(C)C=C5)=O)=C6)=C6N4)=O)[C@]2(C)[C@H](C)CC3             | 4.21 |
| O=C(CC1)[C@]2([H])[C@@]31[C@@H](C)[C@H](O)[C@](C)(C=C)C[C@@H](OC(CSC4=NC(C=CC(NC(C5=CC=C(C)C=C5)=O)=C6)=C6N4)=O)[C@]2(C)[C@H](C)CC3             | 4.21 |
| O=C(CC1)[C@]2([H])[C@@]31[C@@H](C)[C@H](O)[C@](C)(C=C)C[C@@H](OC(CN4CCN(C(CO)=O)CC4)=O)[C@]2(C)[C@H](C)CC3                                      | 4.20 |
| O=C(CC1)[C@]2([H])[C@@]31[C@@H](C)[C@H](O)[C@](C)(C=C)C[C@@H](OC(CNC(C)(C)C)=O)[C@]2(C)[C@H](C)CC3                                              | 4.13 |
| O=C(CC1)[C@]2([H])[C@@]31[C@@H](C)[C@H](O)[C@](C)(C=C)C[C@@H](OC(CS[C@H]4CC[C@H](C(OC)=O)C[C@H]4NS(=O)C5=CC=C(C(F)F)C=C5)=O)[C@]2(C)[C@H](C)CC3 | 4.08 |
| O=C(CC1)[C@]2([H])[C@@]31[C@@H](C)[C@H](O)[C@](C)(C=C)C[C@@H](OC(CN4CCN(CC(NC5=CC=C(NCC6=CC=CC=C6)C=C5C)=O)CC4)=O)[C@]2(C)[C@H](C)CC3           | 4.04 |
| O=C(CC1)[C@]2([H])[C@@]31[C@@H](C)[C@H](O)[C@](C)(C=C)C[C@@H](OC(CN4CCN(CC(NC5=CC=C(NCCC)C=C5C)=O)CC4)=O)[C@]2(C)[C@H](C)CC3                    | 4.01 |
| O=C(CC1)[C@]2([H])[C@@]31[C@@H](C)[C@H](O)[C@](C)(C=C)C[C@@H](OC(CN4CCN(CC(NC5=CC=C(NC(C)C=C5C)=O)CC4)=O)[C@]2(C)[C@H](C)CC3                    | 4.01 |
| O=C(CC1)[C@]2([H])[C@@]31[C@@H](C)[C@H](O)[C@](C)(C=C)C[C@@H](OC(CN4CCN(C(CN5CCN(C(CCl)=O)CC5)=O)CC4)=O)[C@]2(C)[C@H](C)CC3                     | 4.01 |
| O=C(CC1)[C@]2([H])[C@@]31[C@@H](C)[C@H](O)[C@](C)(C=C)C[C@@H](OC(CN4CCN(CC(NC5=CC=C(NCC=C)C=C5C)=O)CC4)=O)[C@]2(C)[C@H](C)CC3                   | 4.01 |
| O=C(CC1)[C@]2([H])[C@@]31[C@@H](C)[C@H](O)[C@](C)(C=C)C[C@@H](OC(CN4CCN(CC(NC5=CC=C([N+](O-)=O)C=C5C)=O)CC4)=O)[C@]2(C)[C@H](C)CC3              | 4.00 |
| O=C(CC1)[C@]2([H])[C@@]31[C@@H](C)[C@H](O)[C@](C)(C=C)C[C@@H](OC(CN4CCN(CC(NC5=CC=C(NCC)C=C5C)=O)CC4)=O)[C@]2(C)[C@H](C)CC3                     | 4.00 |
| O=C(CC1)[C@]2([H])[C@@]31[C@@H](C)[C@H](O)[C@](C)(C=C)C[C@@H](OC(CN4CCN(CC(NC5=CC=C(NC)C=C5C)=O)CC4)=O)[C@]2(C)[C@H](C)CC3                      | 3.99 |
| O=C(CC1)[C@]2([H])[C@@]31[C@@H](C)[C@H](O)[C@](C)(C=C)C[C@@H](OC(CN4CCN(CC(NC5=CC=C(N)C=C5C)=O)CC4)=O)[C@]2(C)[C@H](C)CC3                       | 3.98 |
| CC1C23C(C(CC3)=O)C(C(C(C=C)C)C1O)OC(CN4CCN(C(CCl)=O)CC4)=O)(C(CC2)C)C                                                                           | 3.91 |
| O=C(CC1)[C@]2([H])[C@@]31[C@@H](C)[C@H](O)[C@](C)(C=C)C[C@@H](OC(CN4CCN(C5=CC=C(C/C=C/C6=CC=C(C=C6)OC)=O)C=C5)CC4)=O)[C@]2(C)[C@H](C)CC3        | 3.73 |
| O=C(CC1)[C@]2([H])[C@@]31[C@@H](C)[C@H](O)[C@](C)(C=C)C[C@@H](OC(CN4CCN(C5=CC=C(C/C=C/C6=CC=C56)=O)C=C5)CC4)=O)[C@]2(C)[C@H](C)CC3              | 3.71 |
| O=C(CC1)[C@]2([H])[C@@]31[C@@H](C)[C@H](O)[C@](C)(C=C)C[C@@H](OC(CN4CCN(C5=CC=C(C/C=C/C6=CC=CC=C6)=O)C=C5)CC4)=O)[C@]2(C)[C@H](C)CC3            | 3.71 |
| O=C(CC1)[C@]2([H])[C@@]31[C@@H](C)[C@H](O)[C@](C)(C=C)C[C@@H](OC(CN4CCN(C5=CC=C(C/C=C/C6=CC=CO6)=O)C=C5)CC4)=O)[C@]2(C)[C@H](C)CC3              | 3.70 |
| O=C(CC1)[C@]2([H])[C@@]31[C@@H](C)[C@H](O)[C@](C)(C=C)C[C@@H](OC(CNCCCCCCCCCCCCCCC)=O)[C@]2(C)[C@H](C)CC3                                       | 3.67 |
| O=C(CC1)[C@]2([H])[C@@]31[C@@H](C)[C@H](O)[C@](C)(C=C)C[C@@H](OC(CN4CCN(C(CN5CCNCC5)=O)CC4)=O)[C@]2(C)[C@H](C)CC3                               | 3.65 |
| O=C1CC[C@]2(CC[C@H]3C)[C@]1([H])[C@]3(C)[C@H](OC(CN4CCN(C5=CC=CC=C5OC)CC4)=O)C[C@@](C)(C=C)[C@@H](O)[C@@H]2C                                    | 3.64 |
| O=C(CC1)[C@]2([H])[C@@]31[C@@H](C)[C@H](O)[C@](C)(C=C)C[C@@H](OC(CNCCCCCCCCCCCC)=O)[C@]2(C)[C@H](C)CC3                                          | 3.63 |
| O=C(CC1)[C@]2([H])[C@@]31[C@@H](C)[C@H](O)[C@](C)(C=C)C[C@@H](OC(CS(S(C4=NNC(N)=N4)=O)=O)[C@]2(C)[C@H](C)CC3                                    | 3.63 |
| O=C1CC[C@]2(CC[C@H]3C)[C@]1([H])[C@]3(C)[C@H](OC(CN4CCN(C5=CC=CC=C5C)CC4)=O)C[C@@](C)(C=C)[C@@H](O)[C@@H]2C                                     | 3.62 |
| O=C(CC1)[C@]2([H])[C@@]31[C@@H](C)[C@H](O)[C@](C)(C=C)C[C@@H](OC(CS(S(C4=NNC=N4)=O)=O)[C@]2(C)[C@H](C)CC3                                       | 3.61 |
| O=C(CC1)[C@]2([H])[C@@]31[C@@H](C)[C@H](O)[C@](C)(C=C)C[C@@H](OC(CN(CC(C)C)CC(C)C)=O)[C@]2(C)[C@H](C)CC3                                        | 3.58 |
| O=C(CC1)[C@]2([H])[C@@]31[C@@H](C)[C@H](O)[C@](C)(C=C)C[C@@H](OC(CNCCCCCCCC)=O)[C@]2(C)[C@H](C)CC3                                              | 3.58 |

Table S3. Summary of 51 compounds for 3D-QSAR model construction.

| SMILES                                                                                                                                                                       | pMIC | 3D-QSAR Set |
|------------------------------------------------------------------------------------------------------------------------------------------------------------------------------|------|-------------|
| <chem>O=C(CC1)[C@]2([H])[C@@]31[C@@H](C)[C@H](O)[C@](C)(C=C)C[C@@H](OC(CSCC4=CSC(NC(C5=CC=NC=C5)=O)=N4)=O)[C@]2(C)[C@H](C)CC3</chem>                                         | 8.2  | Training    |
| <chem>O=C(CC1)[C@]2([H])[C@@]31[C@@H](C)[C@H](O)[C@](C)(C=C)C[C@@H](OC(CSCC4=CSC(NC(C5=CC=CC(N)=C5)=O)=N4)=O)[C@]2(C)[C@H](C)CC3</chem>                                      | 7.9  | Test        |
| <chem>O=C(CC1)[C@]2([H])[C@@]31[C@@H](C)[C@H](O)[C@](C)(C=C)C[C@@H](OC(CN4CCN(C5=CC=C(Cl)C=C5)CC4)=O)[C@]2(C)[C@H](C)CC3</chem>                                              | 7.57 | Test        |
| <chem>O=C(CC1)[C@]2([H])[C@@]31[C@@H](C)[C@H](O)[C@](C)(C=C)C[C@@H](OC(CN4N=NC(C5=CC=C(CN6C7=NC=NC(N)=C7N=C6)C=C5)=C4)=O)[C@]2(C)[C@H](C)CC3</chem>                          | 7.34 | Training    |
| <chem>O=C(CC1)[C@]2([H])[C@@]31[C@@H](C)[C@H](O)[C@](C)(C=C)C[C@@H](OC(CN4CCN(C5=CC=CC(Cl)=C5)CC4)=O)[C@]2(C)[C@H](C)CC3</chem>                                              | 7.27 | Training    |
| <chem>O=C(CC1)[C@]2([H])[C@@]31[C@@H](C)[C@H](O)[C@](C)(C=C)C[C@@H](OC(CSC4=CC(CO)=CN=C4)=O)[C@]2(C)[C@H](C)CC3</chem>                                                       | 7.03 | Test        |
| <chem>O=C1CC[C@]2(CC[C@H]3C)[C@]1([H])[C@]3(C)[C@H](OC(CSC4=NC(NC=C5)=C5C(NC(CN6CCCC6)=O)=N4)=O)C[C@@](C)(C=C)[C@@H](O)[C@@H]2C</chem>                                       | 7.01 | Training    |
| <chem>O=C(CC1)[C@]2([H])[C@@]31[C@@H](C)[C@H](O)[C@](C)(C=C)C[C@@H](OC(CSC4=NN=C(C5=CC=CC(Cl)=C5)N4)=O)[C@]2(C)[C@H](C)CC3</chem>                                            | 6.96 | Training    |
| <chem>O=C(CC1)[C@]2([H])[C@@]31[C@@H](C)[C@H](O)[C@](C)(C=C)C[C@@H](OC(CS(SC4=NN=C(C)S4)=O)=O)[C@]2(C)[C@H](C)CC3</chem>                                                     | 6.95 | Training    |
| <chem>O=C(CC1)[C@]2([H])[C@@]31[C@@H](C)[C@H](O)[C@](C)(C=C)C[C@@H](OC(CN4CCN(C5=CC=CC=C5)CC4)=O)[C@]2(C)[C@H](C)CC3</chem>                                                  | 6.93 | Training    |
| <chem>O=C(CC1)[C@]2([H])[C@@]31[C@@H](C)[C@H](O)[C@](C)(C=C)C[C@@H](OC(CSC4=CC(NC(CN5CC(CO)CCC5)=O)=CN=C4)=O)[C@]2(C)[C@H](C)CC3</chem>                                      | 6.83 | Test        |
| <chem>O=C(CC1)[C@]2([H])[C@@]31[C@@H](C)[C@H](O)[C@](C)(C=C)C[C@@H](OC(CSC4CCN(C(CCN5C=NC6=C5N=C(N)N=C6N)=O)CC4)=O)[C@]2(C)[C@H](C)CC3</chem>                                | 6.83 | Training    |
| <chem>O=C(CC1)[C@]2([H])[C@@]31[C@@H](C)[C@H](O)[C@](C)(C=C)C[C@@H](OC(CSC4=C(NC(CN5N=NC(CN6CCN(C7=CC=C([N+])([O-])=O)C=C7)CC6)=C5)=O)C=CC=C4)=O)[C@]2(C)[C@H](C)CC3</chem>  | 6.81 | Training    |
| <chem>O=C(CC1)[C@]2([H])[C@@]31[C@@H](C)[C@H](O)[C@](C)(C=C)C[C@@H](OC(CSC4=C(NC(CN5N=NC(CN6CCN(C7=CC=CC([N+])([O-])=O)C=C7)CC6)=C5)=O)C=CC=C4)=O)[C@]2(C)[C@H](C)CC3</chem> | 6.81 | Training    |
| <chem>O=C(CC1)[C@]2([H])[C@@]31[C@@H](C)[C@H](O)[C@](C)(C=C)C[C@@H](OC(N4C(C(C=C(N)C=C5)=C5C4)=O)=O)[C@]2(C)[C@H](C)CC3</chem>                                               | 6.72 | Training    |
| <chem>O=C(CC1)[C@]2([H])[C@@]31[C@@H](C)[C@H](O)[C@](C)(C=C)C[C@@H](OC(CSC4=NN=C(C5=CC=C([N+])([O-])=O)C=C5)N4)=O)[C@]2(C)[C@H](C)CC3</chem>                                 | 6.67 | Training    |
| <chem>O=C(CC1)[C@]2([H])[C@@]31[C@@H](C)[C@H](O)[C@](C)(C=C)C[C@@H](OC(CSC4=NN=C(C5=CC=C(O)C=C5)O4)=O)[C@]2(C)[C@H](C)CC3</chem>                                             | 6.65 | Training    |
| <chem>O=C(CC1)[C@]2([H])[C@@]31[C@@H](C)[C@H](O)[C@](C)(C=C)C[C@@H](OC(CN4CCN(C5=CC=C(C)C=C5)CC4)=O)[C@]2(C)[C@H](C)CC3</chem>                                               | 6.63 | Training    |
| <chem>O=C(CC1)[C@]2([H])[C@@]31[C@@H](C)[C@H](O)[C@](C)(C=C)C[C@@H](OC(CSC4=NC=NC5=C4C=NN5)=O)[C@]2(C)[C@H](C)CC3</chem>                                                     | 6.61 | Training    |
| <chem>O=C(CC1)[C@]2([H])[C@@]31[C@@H](C)[C@H](O)[C@](C)(C=C)C[C@@H](OC(CNC4=CC=CC(Cl)=C4)=O)[C@]2(C)[C@H](C)CC3</chem>                                                       | 6.61 | Training    |
| <chem>O=C(CC1)[C@]2([H])[C@@]31[C@@H](C)[C@H](O)[C@](C)(C=C)C[C@@H](OC(CSC4=C([N+])([O-])=O)C=CC=N4)=O)[C@]2(C)[C@H](C)CC3</chem>                                            | 6.52 | Training    |
| <chem>O=C(CC1)[C@]2([H])[C@@]31[C@@H](C)[C@H](O)[C@](C)(C=C)C[C@@H](OC(CSC4=CC(NC([C@H]5CCCN5)=O)=CN=C4)=O)[C@]2(C)[C@H](C)CC3</chem>                                        | 6.49 | Training    |
| <chem>O=C1CC[C@]2(CC[C@H]3C)[C@]1([H])[C@]3(C)[C@H](OC(CSC4=NC(NC=C5)=C5C(NC(CN6CCC(CO)CC6)=O)=N4)=O)C[C@@](C)(C=C)[C@@H](O)[C@@H]2C</chem>                                  | 6.44 | Training    |
| <chem>O=C(CC1)[C@]2([H])[C@@]31[C@@H](C)[C@H](O)[C@](C)(C=C)C[C@@H](OC(CSC4=NN(C(C5=CC=C(OC)C=C5)=O)C(N)=N4)=O)[C@]2(C)[C@H](C)CC3</chem>                                    | 6.39 | Training    |
| <chem>O=C1CC[C@]2(CC[C@H]3C)[C@]1([H])[C@]3(C)[C@H](OC(CSC4=NC(N(C)C)=CC(C)=N4)=O)C[C@@](C)(C=C)[C@@H](O)[C@@H]2C</chem>                                                     | 6.34 | Training    |
| <chem>O=C(CC1)[C@]2([H])[C@@]31[C@@H](C)[C@H](O)[C@](C)(C=C)C[C@@H](OC(CSC4=C(NC(CN5N=NC(CN6CCOCC6)=C5)=O)C=CC=C4)=O)[C@]2(C)[C@H](C)CC3</chem>                              | 6.14 | Training    |
| <chem>O=C(CC1)[C@]2([H])[C@@]31[C@@H](C)[C@H](O)[C@](C)(C=C)C[C@@H](OC(CSCC4=CSC(NC(CN(CCC)CCC)=O)=N4)=O)[C@]2(C)[C@H](C)CC3</chem>                                          | 6.11 | Training    |
| <chem>O=C(CC1)[C@]2([H])[C@@]31[C@@H](C)[C@H](O)[C@](C)(C=C)C[C@@H](OC(N(CC4)C(C5=C4C=C(OCCN6CCCCC6)C=C5)=O)=O)[C@]2(C)[C@H](C)CC3</chem>                                    | 6.09 | Training    |
| <chem>O=C1CC[C@]2(CC[C@H]3C)[C@]1([H])[C@]3(C)[C@H](OC(CSCC(NC4=CC=C(NCC=C)C=C4C)=O)=O)C[C@@](C)(C=C)[C@@H](O)[C@@H]2C</chem>                                                | 6.08 | Test        |
| <chem>O=C(CC1)[C@]2([H])[C@@]31[C@@H](C)[C@H](O)[C@](C)(C=C)C[C@@H](OC(CS[C@H]4CC[C@H](C(OCC)=O)C[C@H]4NS)=O)(C5=CC=C(C#N)C=C5)=O)[C@]2(C)[C@H](C)CC3</chem>                 | 5.86 | Training    |

|                                                                                                                                                              |      |          |
|--------------------------------------------------------------------------------------------------------------------------------------------------------------|------|----------|
| <chem>O=C(CC1)[C@]2([H])[C@@]31[C@@H](C)[C@H](O)[C@](C)(C=C)C[C@@H](OC(CS[C@H]4CC[C@H](C(OCC)=O)C[C@H]4NS(=O)(C5=CC=C(C#N)C=C5)=O)[C@]2(C)[C@H](C)CC3</chem> | 5.86 | Training |
| <chem>O=C(CC1)[C@]2([H])[C@@]31[C@@H](C)[C@H](O)[C@](C)(C=C)C[C@@H](OC(CN4CCN(C(NC5=CC=CC6=C5C=CC=N6)=O)CC4)=O)[C@]2(C)[C@H](C)CC3</chem>                    | 5.79 | Training |
| <chem>O=C(CC1)[C@]2([H])[C@@]31[C@@H](C)[C@H](O)[C@](C)(C=C)C[C@@H](OC(N4C(C(C=C(NC(C(O)=O)C(C)C)C=C5)=C5C4)=O)[C@]2(C)[C@H](C)CC3</chem>                    | 5.77 | Test     |
| <chem>O=C(CC1)[C@]2([H])[C@@]31[C@@H](C)[C@H](O)[C@](C)(C=C)C[C@@H](OC(CS[C@H]4CC[C@H](C(OCC)=O)C[C@H]4N)=O)[C@]2(C)[C@H](C)CC3</chem>                       | 5.75 | Test     |
| <chem>O=C(CC1)[C@]2([H])[C@@]31[C@@H](C)[C@H](O)[C@](C)(C=C)C[C@@H](OC(CN4N=NC(CCCN5C(N=CN=C6N)=C6N=C5)=C4)=O)[C@]2(C)[C@H](C)CC3</chem>                     | 5.48 | Training |
| <chem>O=C1CC[C@]2(CC[C@H]3C)[C@]1([H])[C@]3(C)[C@H](OC(CSC4=NC(O)=CC(NC([C@H](C)C(C)C)=O)=N4)=O)C[C@@](C)(C=C)[C@H](O)[C@@H]2C</chem>                        | 5.48 | Training |
| <chem>O=C1CC[C@]2(CC[C@H]3C)[C@]1([H])[C@]3(C)[C@H](OC(CSC4=NC(N)=CC(N4C)=O)=O)C[C@@](C)(C=C)[C@H](O)[C@@H]2C</chem>                                         | 5.41 | Training |
| <chem>O=C(CC1)[C@]2([H])[C@@]31[C@@H](C)[C@H](O)[C@](C)(C=C)C[C@@H](OC(CNCC(C)C)=O)[C@]2(C)[C@H](C)CC3</chem>                                                | 5.34 | Test     |
| <chem>O=C(CC1)[C@]2([H])[C@@]31[C@@H](C)[C@H](O)[C@](C)(C=C)C[C@@H](OC(CSC4CCN(C(CCN5C=NC6=C5N=C(N)N=C6N7CC(CNC)CC7)=O)CC4)=O)[C@]2(C)[C@H](C)CC3</chem>     | 5.29 | Training |
| <chem>O=C(CC1)[C@]2([H])[C@@]31[C@@H](C)[C@H](O)[C@](C)(C=C)C[C@@H](OC(CN4CCN(C(CN5N=NC(CN6CCN(C7=CC(C)=CC=C7)CC6)=C5)=O)CC4)=O)[C@]2(C)[C@H](C)CC3</chem>   | 5.27 | Training |
| <chem>O=C1CC[C@]2(CC[C@H]3C)[C@]1([H])[C@]3(C)[C@H](OC(CSC4=NC(O)=CC(NC([C@@H]5NCCCC5)=O)=N4)=O)C[C@@](C)(C=C)[C@H](O)[C@@H]2C</chem>                        | 5.19 | Test     |
| <chem>O=C(CC1)[C@]2([H])[C@@]31[C@@H](C)[C@H](O)[C@](C)(C=C)C[C@@H](OC(CSC4=NN=C(NC(C5=CC=CC=C5N)=O)S4)=O)[C@]2(C)[C@H](C)CC3</chem>                         | 5.19 | Test     |
| <chem>O=C(CC1)[C@]2([H])[C@@]31[C@@H](C)[C@H](O)[C@](C)(C=C)C[C@@H](OC(CN4CCCC4)=O)[C@]2(C)[C@H](C)CC3</chem>                                                | 5.05 | Training |
| <chem>O=C(CC1)[C@]2([H])[C@@]31[C@@H](C)[C@H](O)[C@](C)(C=C)C[C@@H](OC(CN4CCN(C(CN5N=NC(CN6CCN(C7=CC=C(C)C=C7)CC6)=C5)=O)CC4)=O)[C@]2(C)[C@H](C)CC3</chem>   | 4.97 | Test     |
| <chem>O=C(CC1)[C@]2([H])[C@@]31[C@@H](C)[C@H](O)[C@](C)(C=C)C[C@@H](OC(CN4CCN(C(CN5N=NC(CN6CCN(C)CC6)=C5)=O)CC4)=O)[C@]2(C)[C@H](C)CC3</chem>                | 4.92 | Training |
| <chem>O=C(CC1)[C@]2([H])[C@@]31[C@@H](C)[C@H](O)[C@](C)(C=C)C[C@@H](OC(CSC(C)(C)CNC(C4=CC(Cl)=CC=C4)=O)=O)[C@]2(C)[C@H](C)CC3</chem>                         | 4.88 | Training |
| <chem>O=C(CC1)[C@]2([H])[C@@]31[C@@H](C)[C@H](O)[C@](C)(C=C)C[C@@H](OC(CN(CC)CC)=O)[C@]2(C)[C@H](C)CC3</chem>                                                | 4.73 | Test     |
| <chem>O=C(CC1)[C@]2([H])[C@@]31[C@@H](C)[C@H](O)[C@](C)(C=C)C[C@@H](OC(CN4CCN(C(CN5N=NC(CN6CCN(N7CCC(O)CC7)CC6)=C5)=O)CC4)=O)[C@]2(C)[C@H](C)CC3</chem>      | 4.67 | Test     |
| <chem>O=C1CC[C@]2(CC[C@H]3C)[C@]1([H])[C@]3(C)[C@H](OC(CSC4=NC(O)=CC(NC(C5=CC=CC(Cl)=C5)=O)=N4)=O)C[C@@](C)(C=C)[C@H](O)[C@@H]2C</chem>                      | 4.3  | Training |
| <chem>O=C(CC1)[C@]2([H])[C@@]31[C@@H](C)[C@H](O)[C@](C)(C=C)C[C@@H](OC(CSCC4=CSC(NC(CN5C=CN=N5)=O)=N4)=O)[C@]2(C)[C@H](C)CC3</chem>                          | 4.28 | Test     |
| <chem>O=C(CC1)[C@]2([H])[C@@]31[C@@H](C)[C@H](O)[C@](C)(C=C)C[C@@H](OC(CNCCCCCCCCCCC)=O)[C@]2(C)[C@H](C)CC3</chem>                                           | 4.23 | Test     |

**Table S4.** Summary of experimental versus predictive activity(3D-QSAR).

| Name    | Type     | Experimental Activity | Predictive Activity | Residual |
|---------|----------|-----------------------|---------------------|----------|
| molec1  | Training | 8.2                   | 8.28                | -0.08    |
| molec2  | Test     | 7.9                   | 7.87                | 0.03     |
| molec3  | Training | 7.27                  | 7.16                | 0.11     |
| molec4  | Training | 6.95                  | 6.98                | -0.03    |
| molec5  | Training | 6.96                  | 7.08                | -0.12    |
| molec6  | Training | 7.01                  | 7.02                | -0.01    |
| molec7  | Training | 6.72                  | 6.74                | -0.02    |
| molec8  | Training | 6.83                  | 6.97                | -0.14    |
| molec9  | Test     | 6.83                  | 7.20                | -0.37    |
| molec10 | Training | 6.61                  | 6.73                | -0.12    |
| molec11 | Training | 6.65                  | 6.51                | 0.14     |
| molec12 | Training | 6.61                  | 6.75                | -0.14    |
| molec13 | Training | 6.81                  | 6.74                | 0.07     |
| molec14 | Training | 6.81                  | 6.71                | 0.10     |
| molec15 | Training | 6.67                  | 6.58                | 0.09     |
| molec16 | Training | 6.63                  | 6.64                | -0.01    |
| molec17 | Training | 6.52                  | 6.53                | -0.01    |

---

|         |          |      |      |       |
|---------|----------|------|------|-------|
| molec18 | Training | 6.49 | 6.62 | -0.13 |
| molec19 | Training | 6.34 | 6.27 | 0.07  |
| molec20 | Training | 6.44 | 6.46 | -0.02 |
| molec21 | Training | 6.11 | 6.12 | -0.01 |
| molec22 | Training | 6.14 | 6.10 | 0.04  |
| molec23 | Training | 5.86 | 5.91 | -0.05 |
| molec24 | Training | 5.86 | 5.72 | 0.14  |
| molec25 | Test     | 5.77 | 6.46 | -0.69 |
| molec26 | Training | 5.48 | 5.39 | 0.09  |
| molec27 | Training | 5.41 | 5.44 | -0.03 |
| molec28 | Training | 5.05 | 5.30 | -0.25 |
| molec29 | Training | 5.29 | 5.23 | 0.06  |
| molec30 | Training | 5.27 | 5.29 | -0.02 |
| molec31 | Test     | 4.97 | 5.67 | -0.70 |
| molec32 | Training | 4.92 | 5.03 | -0.11 |
| molec33 | Test     | 4.73 | 5.07 | -0.34 |
| molec34 | Training | 6.39 | 6.33 | 0.06  |
| molec35 | Test     | 4.28 | 4.78 | -0.50 |
| molec36 | Training | 4.3  | 4.46 | -0.16 |
| molec37 | Test     | 7.57 | 7.17 | 0.40  |
| molec38 | Training | 7.34 | 7.32 | 0.02  |
| molec39 | Test     | 7.03 | 6.73 | 0.30  |
| molec40 | Training | 6.93 | 6.73 | 0.20  |
| molec41 | Test     | 6.08 | 6.24 | -0.16 |
| molec42 | Training | 6.09 | 5.96 | 0.13  |
| molec43 | Test     | 5.75 | 5.85 | -0.10 |
| molec44 | Training | 5.79 | 5.85 | -0.06 |
| molec45 | Training | 5.48 | 5.34 | 0.14  |
| molec46 | Test     | 5.34 | 6.37 | -1.03 |
| molec47 | Test     | 5.19 | 6.29 | -1.10 |
| molec48 | Test     | 5.19 | 5.84 | -0.65 |
| molec49 | Training | 4.88 | 4.80 | 0.08  |
| molec50 | Test     | 4.67 | 5.22 | -0.55 |
| molec51 | Test     | 4.23 | 5.45 | -1.22 |
